# Supplementary material
Source: publisher figshare collection journal article supplement (https://gsapubs.figshare.com/ndownloader/files/23299373)
Supplement: Supplementary file 1 [file 23299373]

## Sheet: Feldspar
Electron microprobe analyses of feldspars from volcanic ash beds in the Morrison Formation (wt%)											End Members
Sample #	Grain	SiO2	Al2O3	Fe2O3	CaO	BaO	Na2O	K2O	Total		Albite	Anorthite	Orthoclase	Celsian
LCM-1	10a	64.831	22.83	0.258943	3.29	0.144	8.875	1.164	101.393		0.774499	0.158663	0.0668375	0.00253301
LCM-1	10b	64.711	22.559	0.291172	3.236	0.098	8.909	1.179	100.983		0.776516	0.155868	0.0676161	0.00172315
LCM-1	11b	65.695	21.874	0.196708	2.315	0.05	9.469	1.401	101.001		0.811386	0.109623	0.0789908	0.00086505
LCM-1	1a	57.233	26.684	0.18226	8.176	0.056	6.539	0.431	99.3013		0.57659	0.398404	0.0250062	0.000996859
LCM-1	1b	58.116	26.437	0.214489	7.819	0.005	6.755	0.447	99.7935		0.594104	0.380028	0.0258678	8.88571e-05
LCM-1	2a	59.164	24.91	0.28117	6.756	0.024	7.197	0.504	98.8362		0.639044	0.33151	0.0294459	0.000430454
LCM-1	2b	59.362	25.232	0.325624	6.633	0	7.142	0.555	99.2496		0.639236	0.328079	0.032685	0
LCM-1	3a	65.302	18.447	0.450095	0.358	0.132	2.788	11.864	99.3411		0.258336	0.0183317	0.723332	0.00246557
LCM-1	4a	59.425	25.154	0.263389	6.748	0.032	7.253	0.789	99.6644		0.630628	0.324234	0.0451385	0.000561933
LCM-1	4b	59.613	25.626	0.246718	6.716	0.032	7.03	0.766	100.03		0.625143	0.330037	0.0448196	0.000574709
LCM-1	5a	58.232	26.205	0.335626	7.772	0.012	6.81	0.609	99.9756		0.591881	0.373291	0.0348273	0.000210718
LCM-1	5b	60.063	25.756	0.218935	6.974	0.008	6.701	0.675	100.396		0.609231	0.35039	0.0403795	0.000146957
LCM-1	6a	67.453	18.936	0.196708	0.223	0.109	5.15	8.941	101.009		0.461624	0.0110462	0.52733	0.00197049
LCM-1	6b	66.901	19.354	0.138918	0.37	0.069	5.524	7.929	100.286		0.504677	0.0186805	0.476643	0.00127227
LCM-1	7a	59.096	25.928	0.286727	7.241	0.041	6.723	0.74	100.056		0.599655	0.356915	0.0434295	0.000738457
LCM-1	7b	58.543	25.48	0.282281	7.343	0.021	6.801	0.764	99.2343		0.598595	0.357159	0.0442455	0.000373372
LCM-1	9a	66.117	18.704	0.378968	0.36	0.029	4.382	9.498	99.469		0.404599	0.0183689	0.577032	0.000540803
LCM-1	9b	66.81	19.172	0.491214	0.518	0.082	6.372	6.561	100.006		0.580577	0.026082	0.393341	0.00150753
LCM-1.5	1	64.83	18.808	0.712372	0.503	0.192	3.692	10.196	98.9334		0.345733	0.02603	0.628237	0.00362017
LCM-1.5	1	65.126	19.385	0.367855	0.68	0.171	5.193	8.166	99.0889		0.474599	0.0343435	0.491058	0.00314817
LCM-1.5	2	62.459	23.338	0.256721	4.407	0.183	8.376	0.868	99.8877		0.735864	0.21396	0.0501759	0.00323837
LCM-1.5	2	62.558	23.552	0.215601	4.606	0.137	8.364	0.879	100.312		0.728081	0.221573	0.0503465	0.00240416
LCM-1.5	2	62.106	23.745	0.292284	4.636	0.13	8.303	0.866	100.078		0.726119	0.224049	0.0498317	0.00229215
LCM-1.5	3	61.687	23.25	0.351185	4.329	0.181	8.509	0.818	99.1252		0.743824	0.209126	0.04705	0.00318719
LCM-1.5	3	63.24	23.414	0.157811	4.346	0.13	8.388	0.798	100.474		0.741332	0.212262	0.0464058	0.0023164
LCM-1.5	3	62.401	23.601	0.211155	4.427	0.109	8.364	0.8	99.9132		0.737772	0.215797	0.0464315	0.00193917
LCM-1.5	4	62.736	22.768	0.180038	3.911	0.23	8.705	0.945	99.475		0.757741	0.188134	0.0541251	0.00402949
LCM-1.5	4	62.822	22.968	0.24783	4.017	0.183	8.428	0.948	99.6138		0.747717	0.196944	0.0553395	0.00327013
LCM-1.5	4	62.05	23.196	0.197819	4.401	0.166	8.527	0.929	99.4668		0.73697	0.2102	0.0528304	0.00289086
LCM-1.5	5	59.067	26.272	0.274502	7.538	0.054	6.921	0.481	100.608		0.606938	0.365308	0.0277546	0.000956042
LCM-1.5	5	58.467	26.054	0.296729	7.407	0.058	6.743	0.525	99.5507		0.603039	0.366068	0.0308934	0.0010471
LCM-1.5	5	58.38	26.23	0.310065	7.569	0.039	6.874	0.457	99.8591		0.605239	0.368285	0.0264758	0.000693433
LCM-1.5	6	58.958	26.138	0.400084	7.476	0	6.86	0.419	100.251		0.608853	0.366678	0.024469	0
LCM-1.5	6	57.476	26.455	0.382303	8.062	0.046	6.57	0.382	99.3733		0.582623	0.395087	0.0222895	0.000823656
LCM-1.5	6	57.643	26.314	0.310065	8.166	0.094	6.574	0.392	99.4931		0.579481	0.397783	0.0227358	0.00167161
LCM-1.5	7	62.576	23.913	0.252275	4.638	0.112	8.265	0.82	100.576		0.727066	0.22547	0.0474635	0.00198705
LCM-1.5	7	61.831	23.687	0.320067	4.686	0.136	8.247	0.851	99.7581		0.723642	0.227226	0.0491328	0.00240571
LCM-1.5	7	62.389	23.78	0.360076	4.696	0.179	8.215	0.857	100.476		0.722261	0.228162	0.0495772	0.00317018
LCM-1.5	8	57.229	27.066	0.373412	8.588	0.06	6.201	0.409	99.9264		0.55287	0.423137	0.0239938	0.00107986
LCM-1.5	8	57.092	26.922	0.296729	8.634	0.069	6.2	0.432	99.6457		0.550838	0.423908	0.025254	0.00123728
LCM-1.5	8	56.855	27.188	0.278947	8.731	0.03	6.103	0.406	99.5919		0.54515	0.430987	0.0238624	0.000541231
LCM-1.5	9	62.242	23.509	0.287838	4.57	0.19	8.259	0.818	99.8758		0.729419	0.223045	0.0475355	0.00337953
LCM-1.5	9	62.209	23.338	0.270057	4.556	0.103	8.257	0.77	99.5031		0.731913	0.223177	0.04491	0.00184161
LCM-1.5	9	62.428	23.594	0.153366	4.734	0.149	8.262	0.833	100.153		0.723074	0.228957	0.0479687	0.00262824
LCM-1.5	10	60.481	25.481	0.30562	6.418	0.107	7.414	0.565	100.772		0.654226	0.31297	0.0328048	0.00190438
LCM-1.5	10	60.446	25.187	0.265611	6.429	0.082	7.366	0.539	100.315		0.653393	0.315148	0.0314591	0.00146772
LCM-1.5	10	60.11	25.49	0.310065	6.494	0.091	7.279	0.549	100.323		0.648235	0.319595	0.0321697	0.00163499
LCM-1.5	11	62.435	23.721	0.188929	4.539	0.147	8.33	0.806	100.167		0.732715	0.220637	0.0466487	0.00260614
LCM-1.5	11	62.395	23.744	0.20671	4.64	0.067	8.315	0.806	100.174		0.728779	0.224739	0.0464818	0.00118527
LCM-1.5	11	62.245	23.87	0.265611	4.8	0.108	8.09	0.753	100.132		0.719876	0.236036	0.0440879	0.00193827
LCM-1.5	12	64.656	20.08	0.341183	1.314	0.277	5.072	7.878	99.6182		0.461858	0.0661229	0.472019	0.00507136
LCM-1.5	12	64.817	20.901	0.373412	2.235	0.15	6.84	4.858	100.174		0.606835	0.109577	0.283587	0.00268203
LCM-1.5	13	64.107	19.058	0	0	0.002	0.547	16.264	99.978		0.048629	0	0.951371	3.59291e-05
LCM-1.5	13	64.378	19.129	0	0.014	0.033	0.582	16.032	100.168		0.0522511	0.000694589	0.947054	0.000598343
LCM-1.5	13	64.088	18.923	0	0.166	0.051	0.619	16.019	99.866		0.0550175	0.00815353	0.936829	0.000915179
LCM-1.5	14	58.054	25.956	0.184483	7.319	0.035	7.11	0.446	99.1045		0.621064	0.353302	0.025634	0.000617433
LCM-1.5	14	57.974	26.471	0.215601	7.496	0.078	6.978	0.414	99.6266		0.612489	0.363601	0.0239102	0.00138161
LCM-1.5	14	57.56	26.966	0.130027	8.16	0.066	6.543	0.352	99.777		0.579848	0.399627	0.0205255	0.00118057
LCM-5	2	66.66	17.792	0.202265	0.085	0.047	3.391	11.152	99.3293		0.314687	0.0043591	0.680954	0.000880621
LCM-5	2	65.446	19.515	0.337849	0.593	0	5.483	8.083	99.4578		0.492669	0.0294455	0.477886	0
LCM-5	3	64.527	19.478	0.912414	1.356	0.181	8.01	4.808	99.2724		0.671814	0.0628498	0.265336	0.00305836
LCM-5	4	65.779	18.992	0.552338	0.263	0.701	7.679	5.308	99.2743		0.678542	0.0128427	0.308615	0.0123626
LCM-5	4	65.953	18.886	0.273391	0.395	0.179	5.196	8.776	99.6584		0.464395	0.0195094	0.516095	0.0032225
LCM-5	5	65.151	21.973	0.0900189	2.47	0.003	10.182	0.248	100.117		0.869502	0.116563	0.0139349	5.17678e-05
LCM-5	5	63.464	23.752	0.287838	3.85	0	9.433	0.135	100.922		0.80974	0.182635	0.00762508	0
LCM-5	5	62.8	23.2	0.140029	4.332	0	9.427	0.117	100.016		0.792322	0.201208	0.00647037	0
LCM-5	7	55.28	27.617	0.256721	9.802	0.06	5.803	0.436	99.2547		0.504316	0.470752	0.0249317	0.00105261
LCM-5	7	54.404	28.001	0.426756	10.374	0.038	5.432	0.38	99.0558		0.475868	0.502228	0.0219041	0.000672267
LCM-5	8	66.112	18.953	0.30562	0.483	0.133	4.587	9.834	100.408		0.40505	0.0235697	0.57138	0.0023677
LCM-5	9	67.676	19.97	0.198931	0.02	0.022	11.895	0.052	99.8339		0.996209	0.000925643	0.00286552	0.000372195
LCM-5	9	67.804	19.842	0.0633466	0.024	0	11.936	0.058	99.7273		0.99571	0.0011064	0.00318359	0
LCM-5	9	67.31	19.614	0.207821	0.032	0	11.869	0.03	99.0628		0.996857	0.00148524	0.00165789	0
LCM-5	10	64.043	19.415	0.444538	1.148	0.165	4.063	9.76	99.0385		0.3654	0.0570547	0.577545	0.00298971
LCM-5	11	65.555	20.931	0.378968	1.98	0.084	9.937	0.9	99.766		0.854915	0.094137	0.0509477	0.00145827
LCM-5	12	65.4	19.148	0.498994	0.468	0.161	5.616	8.269	99.561		0.496311	0.022856	0.480833	0.00286701
LCM-5		60.813	24.224	0.260055	6.317	0.138	7.02	0.827	99.5991		0.635003	0.315775	0.049222	0.00251621
LCM-5		60.905	24.399	0.29784	6.436	0.144	7.071	0.929	100.182		0.629152	0.31646	0.0543883	0.00258248
LCM-5		60.997	25.018	0.286727	6.639	0.169	6.98	0.847	100.937		0.622871	0.327396	0.0497326	0.00303831
LCM-5		60.083	24.864	0.290061	7.077	0.139	6.728	0.818	99.9991		0.601943	0.349902	0.0481546	0.00250679
LCM-5		59.866	25.056	0.256721	6.951	0.193	6.579	0.764	99.6657		0.602309	0.351669	0.0460222	0.00355789
LCM-5		59.998	24.999	0.316733	7.137	0.132	6.658	0.785	100.026		0.598818	0.354727	0.0464553	0.00239336
LCM-5		59.762	24.998	0.33896	7.053	0.154	6.512	0.8	99.618		0.595463	0.356404	0.0481333	0.0028376
LCM-5		59.587	25.616	0.427868	7.572	0.136	6.442	0.666	100.447		0.582214	0.378181	0.0396051	0.00247769
LCM-5		58.861	25.16	0.356742	7.749	0.179	6.548	0.677	99.5307		0.580717	0.379777	0.0395056	0.00319773
LCM-5		59.666	25.777	0.331181	7.731	0.112	6.541	0.659	100.817		0.581581	0.379865	0.0385537	0.00200833
LCM-5		58.462	25.211	0.350074	7.841	0.06	6.572	0.677	99.1731		0.579002	0.381752	0.0392452	0.00106707
LCM-5		59.135	25.706	0.30562	7.846	0.098	6.559	0.62	100.27		0.580298	0.383609	0.0360927	0.00174905
LCM-5		58.814	25.541	0.327847	7.839	0.106	6.512	0.634	99.7738		0.578271	0.384685	0.0370443	0.00189855
LCM-5		59.089	25.605	0.3723	7.822	0.075	6.444	0.633	100.04		0.576226	0.38653	0.037244	0.00135342
LCM-5		58.577	25.498	0.304508	7.892	0.154	6.355	0.663	99.4435		0.569826	0.391058	0.039116	0.00278266
LCM-5		58.435	25.959	0.290061	8.044	0.075	6.443	0.603	99.8491		0.570932	0.393909	0.0351584	0.00134122
LCM-5		58.771	25.71	0.327847	8.045	0.063	6.401	0.639	99.9568		0.568105	0.394579	0.0373161	0.00112864
LCM-5		57.87	26.493	0.312288	8.317	0.107	6.167	0.6	99.8663		0.552701	0.411917	0.035382	0.00193412
LCM-5		58.723	26.248	0.364521	8.309	0.072	6.148	0.593	100.458		0.552385	0.412558	0.0350572	0.00130556
LCM-5		58.175	26.124	0.405641	8.474	0.106	6.184	0.547	100.016		0.550823	0.417118	0.0320586	0.00190434
LCM-5		57.943	26.329	0.260055	8.469	0.097	6.065	0.561	99.7241		0.545694	0.421093	0.0332121	0.00176055
LCM-5		58.003	26.349	0.361187	8.517	0.045	6.058	0.595	99.9282		0.543018	0.42189	0.0350927	0.000814454
LCM-5		57.733	25.967	0.364521	8.581	0.044	6.115	0.573	99.3775		0.544326	0.422113	0.0335608	0.000790853
LCM-5		57.594	26.361	0.356742	8.702	0.081	5.966	0.558	99.6187		0.535448	0.4316	0.0329521	0.00146692
LCM-5		57.505	26.48	0.312288	8.816	0.045	5.958	0.537	99.6533		0.532761	0.435644	0.0315952	0.000812485
LCM-5		58.242	26.487	0.408975	8.865	0.099	5.922	0.532	100.556		0.530121	0.438544	0.0313352	0.00178767
LCM-5		57.434	26.417	0.361187	8.917	0.089	5.915	0.51	99.6432		0.52915	0.44083	0.0300199	0.00160635
LCM-5		57.073	26.819	0.435647	9.26	0.082	5.762	0.509	99.9406		0.513813	0.456321	0.0298652	0.00147546
LCM-5		56.697	27.157	0.316733	9.513	0.109	5.57	0.421	99.7837		0.501617	0.473437	0.0249467	0.00197973
LCM-5		57.182	27.424	0.242273	9.629	0.099	5.506	0.462	100.544		0.494647	0.478044	0.0273096	0.00179406
LCM-6	2	59.326	24.852	0.382302	6.475	0.1	6.861	0.726	98.7223		0.628474	0.327769	0.0437574	0.00184765
LCM-6	11	57.291	26.54	0.390082	8.619	0.094	6.062	0.561	99.5571		0.541532	0.425493	0.0329751	0.00169404
LCM-6	1	60.454	24.894	0.428979	6.311	0.125	7.09	0.759	100.062		0.640065	0.31485	0.0450852	0.00227521
LCM-6	1	60.073	24.797	0.326735	6.46	0.081	7.217	0.781	99.7357		0.638626	0.3159	0.0454732	0.00144634
LCM-6	1	60.682	25.229	0.374523	6.425	0.108	7.002	0.753	100.574		0.633777	0.321377	0.044846	0.00197153
LCM-6	2	59.566	24.842	0.280059	6.571	0.1	6.979	0.786	99.1241		0.627188	0.326335	0.0464774	0.00181276
LCM-6	2	58.724	25.008	0.351185	6.553	0.131	6.93	0.758	98.4552		0.627145	0.32772	0.0451355	0.00238996
LCM-6	3	57.243	27.331	0.448983	8.814	0.069	5.892	0.546	100.344		0.529758	0.437941	0.0323014	0.00125211
LCM-6	3	56.322	26.684	0.467876	9.021	0.088	5.694	0.546	98.8229		0.515833	0.451621	0.0325461	0.00160842
LCM-6	3	56.651	27.471	0.452317	9.084	0.088	5.745	0.525	100.016		0.517081	0.451828	0.0310915	0.00159801
LCM-6	4	60.671	24.585	0.334515	6.319	0.122	7.106	0.813	99.9505		0.638285	0.313665	0.0480502	0.00220959
LCM-6	4	60.321	24.543	0.385637	6.289	0.12	6.942	0.814	99.4146		0.633797	0.317303	0.0488995	0.00220907
LCM-6	4	60.37	24.601	0.346739	6.403	0.122	7.042	0.782	99.6667		0.634702	0.318922	0.0463762	0.00221714
LCM-6	5	57.358	26.248	0.323401	8.378	0.122	6.254	0.599	99.2824		0.554531	0.410522	0.034947	0.00218124
LCM-6	5	56.533	26.037	0.405641	8.51	0.084	6.236	0.565	98.3706		0.551343	0.415789	0.0328684	0.00149854
LCM-6	6	60.019	24.544	0.377857	6.069	0.109	7.339	0.81	99.2679		0.65376	0.298763	0.0474768	0.00195831
LCM-6	6	60.019	24.544	0.377857	6.069	0.109	7.339	0.81	99.2679		0.65376	0.298763	0.0474768	0.00195831
LCM-6	6	60.261	24.845	0.323401	6.395	0.186	7.258	0.769	100.037		0.642414	0.3128	0.0447857	0.00331583
LCM-6	7	60.205	24.331	0.425645	6.192	0.111	7.274	0.831	99.3696		0.647003	0.304363	0.0486349	0.00199119
LCM-6	7	60.272	25.221	0.41342	6.577	0.158	7.063	0.735	100.439		0.631685	0.325062	0.0432527	0.00284743
LCM-6	8	59.366	24.505	0.33896	6.165	0.146	7.164	0.793	98.478		0.645831	0.307131	0.0470382	0.00265269
LCM-6	8	58.029	25.502	0.362298	7.176	0.067	6.722	0.668	98.5263		0.604108	0.356391	0.0395009	0.00121531
LCM-6	9	60.394	22.932	0.390082	5.3	0.132	7.871	1.015	98.0341		0.68636	0.255403	0.0582375	0.00232065
LCM-6	9	61.125	23.649	0.287838	5.429	0.252	7.467	1.001	99.2108		0.671141	0.269659	0.0591993	0.00455626
LCM-6	10	60.381	23.629	0.370078	5.589	0.138	7.506	0.931	98.5441		0.669749	0.275591	0.0546598	0.00248214
LCM-6	10	60.57	24.162	0.323401	5.679	0.176	7.421	0.949	99.2804		0.663551	0.280615	0.0558333	0.00317007
LCM-6	11	56.873	26.485	0.405641	8.963	0.074	6.024	0.524	99.3486		0.532065	0.437482	0.0304527	0.00131905
LCM-6	12	62.959	23.047	0.255609	3.969	0.335	8.146	1.402	100.114		0.723327	0.19476	0.0819131	0.00597525
LCM-6	12	62.225	22.945	0.24783	4.289	0.252	7.896	1.305	99.1598		0.709762	0.213054	0.0771846	0.00455665
LCM-9	1	55.698	28.242	0.22338	10.836	0	5.448	0.281	100.728		0.468803	0.515287	0.0159101	0
LCM-9	1	52.84	29.801	0.330069	13.156	0	4.566	0.172	100.865		0.382109	0.60842	0.00947098	0
LCM-9	1	51.973	30.437	0.255609	13.944	0.006	3.985	0.17	100.771		0.337637	0.652885	0.00947732	0.000102719
LCM-9	2	58.88	25.319	0.416754	7.717	0.092	7.193	0.471	100.089		0.61126	0.362403	0.0263361	0.0015774
LCM-9	2	58.032	24.915	0.357853	7.897	0.106	6.932	0.451	98.6909		0.597957	0.376445	0.0255978	0.00184433
LCM-9	2	57.58	25.053	0.31451	7.928	0.15	6.898	0.461	98.3845		0.595553	0.378258	0.0261886	0.00261022
LCM-9	3	58.092	25.609	0.330069	8.455	0.099	6.645	0.468	99.6981		0.571596	0.401916	0.0264883	0.00171793
LCM-9	3	58	26.433	0.57012	8.827	0.094	5.996	0.461	100.381		0.536444	0.436418	0.027138	0.00169659
LCM-9	4	59.441	24.841	0.440092	7.446	0.071	6.925	0.568	99.7321		0.606735	0.36052	0.0327448	0.0012555
LCM-9	4	59.151	25.54	0.368966	7.56	0.116	6.732	0.558	100.026		0.596969	0.370473	0.0325579	0.00207437
LCM-9	4	58.268	26.786	0.444538	8.916	0.137	5.882	0.439	100.873		0.530004	0.443968	0.0260276	0.00248838
LCM-9	5	56.655	26.005	0.416754	8.999	0.08	6.485	0.413	99.0538		0.552866	0.423967	0.0231673	0.00137634
LCM-9	5	56.493	26.391	0.345628	9.359	0.049	6.319	0.408	99.3646		0.537356	0.439815	0.0228291	0.000841332
LCM-9	6	51.938	29.466	0.690145	13.452	0.032	4.372	0.198	100.148		0.366283	0.622803	0.0109148	0.00054147
LCM-9	6	52.109	29.733	0.737933	13.844	0.033	3.692	0.178	100.327		0.322175	0.667605	0.0102203	0.000581587
LCM-9	7	56.589	26.207	0.455651	9.343	0.115	6.302	0.398	99.4097		0.537392	0.440277	0.0223311	0.00197776
LCM-9	7	56.287	26.095	0.534557	9.504	0.054	6.243	0.365	99.0826		0.531986	0.447549	0.0204651	0.00092901
LCM-9	8	58.229	26.443	0.420088	8.795	0.106	6.558	0.437	100.988		0.560233	0.415203	0.0245637	0.00182655
LCM-9	8	57.621	26.456	0.401195	9.037	0.154	6.407	0.434	100.51		0.548235	0.42733	0.0244352	0.00265583
LCM-9	10	56.778	26.937	0.534557	9.61	0	6.059	0.382	100.301		0.521382	0.456989	0.0216288	0
LCM-9	10	55.924	27.911	0.455651	10.4	0.054	5.773	0.317	100.835		0.492205	0.490011	0.0177836	0.000929519
LCM-9	11	59.846	24.415	0.424534	6.448	0.219	7.392	0.689	99.4335		0.647929	0.312333	0.0397374	0.00386413
LCM-9		63.228	18.745	0.00444538	0	0.252	0.851	16.045	99.1254		0.0745946	0	0.925405	0.00444393
LCM-9		64.729	18.906	0	0.009	0.225	0.63	16.14	100.639		0.055976	0.000441908	0.943582	0.00402362
LCM-9		60.544	24.763	0.345628	5.746	0.162	7.655	0.876	100.092		0.671094	0.278376	0.0505309	0.00286175
LCM-9		60.176	24.673	0.404529	5.777	0.13	7.684	0.89	99.7345		0.670383	0.278526	0.0510905	0.0022867
LCM-10	10a	57.478	27.444	0.348962	9.125	0.08	6.042	0.326	100.844		0.534729	0.446287	0.0189839	0.00142872
LCM-10	10b	57.116	27.382	0.291172	9.011	0.023	6.03	0.298	100.151		0.538117	0.444385	0.0174981	0.000414601
LCM-10	10c	56.648	26.898	0.43009	9.031	0.041	6.116	0.328	99.4921		0.540161	0.440778	0.019061	0.000731216
LCM-10	11a	60.921	25.039	0.31451	5.971	0.007	8.023	0.219	100.495		0.699672	0.287761	0.0125666	0.000123346
LCM-10	11b	60.755	25.235	0.20671	6.183	0.072	7.937	0.182	100.571		0.691761	0.297801	0.0104372	0.0012665
LCM-10	11c	60.345	25.351	0.296729	6.635	0.004	7.621	0.278	100.531		0.664396	0.319657	0.0159468	7.04641e-05
LCM-10	2a	66.247	20.003	0.726819	1.071	0.094	9.34	1.833	99.3148		0.838575	0.0531389	0.108286	0.00170258
LCM-10	2b	66.275	20.027	0.304508	1.129	0.085	9.552	1.991	99.3635		0.831624	0.0543193	0.114056	0.00149323
LCM-10	2c	67.406	19.733	0.341183	0.992	0.135	9.85	1.666	100.123		0.856939	0.0476928	0.0953682	0.00236778
LCM-10	3a	52.228	30.348	0.657916	12.355	0.001	3.999	0.387	99.9759		0.360879	0.616142	0.0229793	1.82358e-05
LCM-10	3a	52.803	30.414	0.82684	12.382	0	3.959	0.363	100.748		0.358592	0.619774	0.021634	0
LCM-10	3b	50.252	31.194	0.777941	13.68	0	3.292	0.276	99.4719		0.298365	0.685176	0.0164593	0
LCM-10	4a	53.809	29.309	0.308954	11.148	0	4.768	0.199	99.542		0.43112	0.55704	0.0118394	0
LCM-10	4b	54.827	29.359	0.313399	10.959	0	4.873	0.213	100.544		0.440226	0.547113	0.0126611	0
LCM-10	4c	55.151	28.387	0.371189	10.362	0.036	5.325	0.225	99.8572		0.475476	0.511305	0.0132192	0.000649162
LCM-10	5a	56.651	26.974	0.242273	8.78	0.059	6.158	0.343	99.2073		0.548074	0.431839	0.0200867	0.00106002
LCM-10	5c	55.557	27.628	0.403418	9.534	0.042	5.797	0.268	99.2294		0.515654	0.46866	0.0156857	0.000754398
LCM-10	6a	65.882	19.065	0.116691	0.03	0.039	4.804	9.907	99.8437		0.423662	0.00146206	0.574876	0.00069455
LCM-10	6b	64.998	18.988	0	0.005	0.047	1.669	14.762	100.469		0.146598	0.000242699	0.85316	0.000833546
LCM-10	6c	65.818	19.661	0.121137	0.013	0.05	4.62	10.434	100.717		0.401999	0.000625106	0.597376	0.000878404
LCM-10	7a	55.636	28.361	0.304508	9.807	0.015	5.518	0.25	99.8915		0.497025	0.488158	0.0148167	0.000272956
LCM-10	7b	56.619	28.27	0.348962	9.503	0.054	5.755	0.238	100.788		0.515535	0.470437	0.0140283	0.000976575
LCM-10	7c	55.658	27.851	0.335626	9.88	0.05	5.764	0.254	99.7926		0.506012	0.479316	0.0146719	0.000886228
LCM-10	8a	55.624	27.686	0.447872	9.762	0.023	5.767	0.25	99.5599		0.509174	0.476302	0.0145235	0.000410194
LCM-10	8b	56.55	27.652	0.447872	9.436	0.023	5.817	0.27	100.196		0.518949	0.465202	0.0158491	0.000414474
LCM-10	8c	55.926	27.585	0.313399	9.541	0.082	5.701	0.283	99.4314		0.510853	0.472461	0.0166858	0.00148265
LCM-10	9a	69.253	20.289	0	0.07	0	11.757	0.096	101.465		0.991411	0.00326199	0.00532652	0
LCM-10	9b	68.536	20.078	0.0811281	0.11	0	11.859	0.057	100.721		0.99178	0.00508379	0.00313658	0
LCM-10	9c	68.582	19.868	0.112246	0.083	0.138	11.638	0.109	100.53		0.989997	0.00390177	0.00610094	0.00236662
LCM-12	1	58.563	26.135	0.485658	7.988	0.046	6.577	0.753	100.548		0.57257	0.384297	0.0431331	0.000808595
LCM-12	1	56.479	27.099	0.674586	9.265	0.034	5.992	0.531	100.075		0.522797	0.446719	0.0304839	0.000599106
LCM-12	1	56.074	27.643	0.692368	9.389	0.098	5.932	0.54	100.368		0.516911	0.452128	0.0309616	0.00172272
LCM-12	1	59.262	25.982	0.311176	7.759	0.074	6.767	0.552	100.707		0.592661	0.375529	0.03181	0.00130797
LCM-12	2	54.913	28.551	0.669029	10.527	0.053	5.191	0.363	100.267		0.461533	0.517231	0.021236	0.000951345
LCM-12	2	54.28	28.818	0.589013	11.041	0.013	4.914	0.325	99.98		0.437604	0.543353	0.0190434	0.00023389
LCM-12	2	54.4	29.16	0.710149	11.222	0.039	4.906	0.31	100.747		0.433718	0.548249	0.0180325	0.000696251
LCM-12	2	60.308	24.703	0.423422	6.633	0.086	7.32	0.861	100.334		0.633653	0.317306	0.0490409	0.00150214
LCM-12	2	56.311	27.569	0.554561	10.155	0.018	5.618	0.456	100.682		0.487254	0.486723	0.0260228	0.000315379
LCM-12	2	54.686	28.656	0.460097	11.418	0	5.192	0.337	100.749		0.442869	0.538217	0.0189141	0
LCM-12	2	53.936	29.418	0.483435	12.417	0.025	4.633	0.266	101.178		0.397004	0.587999	0.0149978	0.000432721
LCM-12	3	62.124	23.011	0.310065	3.978	0.187	8.593	1.258	99.4611		0.73956	0.1892	0.07124	0.00324178
LCM-12	3	61.693	23.265	0.292284	4.179	0.172	8.364	1.188	99.1533		0.730156	0.201605	0.068239	0.00302509
LCM-12	3	62.04	23.889	0.310065	4.612	0.15	8.22	1.046	100.267		0.717469	0.222458	0.0600728	0.00263875
LCM-12	4	55.105	28.817	0.646802	10.689	0.008	5.118	0.418	100.802		0.45292	0.52274	0.0243395	0.000143045
LCM-12	4	53.55	29.647	0.633466	11.723	0.042	4.495	0.344	100.434		0.401349	0.578441	0.02021	0.000757245
LCM-12	4	51.127	30.662	0.664584	12.929	0.016	3.929	0.246	99.5736		0.349689	0.635905	0.0144062	0.000287686
LCM-12	4	59.343	25.049	0.438981	7.277	0.09	7.238	0.798	100.234		0.614197	0.341247	0.044556	0.00154094
LCM-12	5	68.047	19.939	0	0.099	0	11.842	0.029	99.956		0.993807	0.00459134	0.00160136	0
LCM-12	5	67.47	20.277	0.0544559	0.118	0.03	11.715	0.044	99.7085		0.992026	0.00552193	0.00245159	0.000513101
LCM-12	6	55.822	27.713	0.467876	9.775	0.016	5.509	0.431	99.7339		0.492118	0.482549	0.0253331	0.000288745
LCM-12	6	55.766	27.827	0.526777	9.684	0.026	5.454	0.43	99.7138		0.49186	0.482624	0.0255158	0.000473606
LCM-12	6	55.137	27.872	0.544559	9.89	0.017	5.513	0.414	99.3876		0.490008	0.48578	0.024212	0.00030525
LCM-12	6	59.567	25.616	0.407863	7.604	0.132	7.067	0.715	101.109		0.60198	0.357945	0.0400745	0.00226704
LCM-12	7	58.331	25.765	0.51233	7.593	0.047	6.615	0.635	99.4983		0.589106	0.373684	0.0372094	0.000845119
LCM-12	7	55.269	27.704	0.404529	9.719	0.031	5.599	0.429	99.1555		0.497592	0.477322	0.0250862	0.000556424
LCM-12	7	55.379	27.802	0.602349	9.815	0.035	5.603	0.445	99.6813		0.494974	0.479159	0.0258664	0.000624428
LCM-12	8	54.837	28.076	0.642357	10.234	0.044	5.329	0.407	99.5694		0.473591	0.50261	0.0237994	0.00078957
LCM-12	8	53.848	28.783	0.733487	10.672	0.014	5.056	0.36	99.4665		0.451814	0.527019	0.0211675	0.000252752
LCM-12	8	54.023	28.847	0.66125	10.962	0.032	4.863	0.317	99.7052		0.43695	0.544308	0.0187414	0.000580696
LCM-12	9	56.692	27.442	0.507884	9.095	0.058	5.897	0.48	100.172		0.524694	0.447204	0.0281016	0.00104178
LCM-12	9	56.027	27.212	0.540113	9.382	0.03	5.78	0.477	99.4481		0.512477	0.459695	0.0278279	0.000537227
LCM-12	9	55.751	28.077	0.549004	9.913	0.065	5.615	0.43	100.4		0.49358	0.481549	0.0248709	0.0011533
LCM-12	10	57.397	26.33	0.589013	8.191	0.092	6.35	0.608	99.557		0.563114	0.401409	0.0354765	0.00164596
LCM-12	10	54.582	28.334	0.476767	10.362	0.044	5.373	0.373	99.5448		0.473614	0.504753	0.0216337	0.000783147
LCM-12	10	54.221	28.839	0.404529	10.697	0.072	5.14	0.339	99.7125		0.455898	0.524318	0.0197842	0.00128884
LCM-12	11	55.858	27.039	0.531223	9.101	0.047	6.076	0.572	99.2242		0.529187	0.438034	0.0327795	0.00082652
LCM-12	11	55.993	27.787	0.589013	9.365	0.063	5.794	0.471	100.062		0.513689	0.458835	0.0274762	0.00112745
LCM-12	11	54.687	28.354	0.60346	10.154	0.069	5.395	0.419	99.6815		0.478195	0.497368	0.0244367	0.00123438
LCM-12	12	60.283	24.664	0.410086	5.91	0.11	7.523	0.848	99.7481		0.662997	0.28783	0.0491735	0.00195518
LCM-12	12	60.459	24.893	0.311176	6.079	0.11	7.609	0.802	100.263		0.661877	0.29222	0.0459028	0.00192987
LCM-12	12	59.638	24.825	0.364521	6.319	0.171	7.535	0.747	99.5995		0.654164	0.303165	0.0426715	0.00299104
LCM-12	13	57.857	26.16	0.382303	8.019	0.056	6.49	0.512	99.4763		0.576461	0.393616	0.0299233	0.00100415
LCM-12	13	58.029	26.776	0.346739	8.072	0.121	6.477	0.487	100.309		0.575314	0.396223	0.0284626	0.00216719
LCM-12	13	57.133	27.171	0.368966	8.572	0.081	6.322	0.465	100.113		0.556268	0.416811	0.0269214	0.00143818
LCM-13	2	61.204	24.927	0.334	5.655	0.127	7.265	0.812	100.324		0.665028	0.286065	0.0489074	0.00234376
LCM-13	5	59.091	25.226	0.205	6.574	0.144	7.088	0.677	99.005		0.634762	0.325345	0.0398924	0.00259922
LCM-13	7	63.079	22.388	0.287	3.242	0.357	8.204	1.554	99.111		0.744593	0.162605	0.0928023	0.00650505
LCM-13	10a	62.604	24.13	0.277836	4.777	0.173	8.104	1.005	101.071		0.710557	0.231463	0.0579802	0.0030559
LCM-13	10b	62.215	23.773	0.326735	4.559	0.197	8.223	1.003	100.297		0.721167	0.220954	0.057879	0.00347922
LCM-13	10c	62.992	24.164	0.246718	4.668	0.179	7.977	1.026	101.253		0.71022	0.229674	0.0601057	0.00321021
LCM-13	11a	62.614	23.939	0.308954	4.785	0.194	8.014	1.017	100.872		0.707484	0.233441	0.0590749	0.00344899
LCM-13	11b	62.649	23.785	0.326735	4.717	0.216	8.111	1.049	100.854		0.710996	0.2285	0.0605038	0.00381164
LCM-13	11c	62.365	23.975	0.282281	4.859	0.204	8.142	0.998	100.825		0.708995	0.233823	0.0571818	0.00357692
LCM-13	12a	61.624	24.948	0.224492	5.73	0.118	7.8	0.754	101.198		0.680472	0.276247	0.0432814	0.00207596
LCM-13	12b	60.964	24.817	0.3723	5.593	0.142	7.785	0.758	100.431		0.684422	0.27173	0.0438479	0.00251642
LCM-13	12c	62.262	24.192	0.354519	5.035	0.137	7.824	0.895	100.7		0.698862	0.248536	0.0526018	0.0024668
LCM-13	14a	64.857	21.69	0.326735	2.478	0.3	8.775	1.967	100.394		0.767136	0.119717	0.113147	0.00527199
LCM-13	14a	65.06	21.792	0.174481	2.502	0.343	8.672	1.971	100.514		0.763949	0.121804	0.114247	0.00606903
LCM-13	14a	64.533	22.154	0.353408	2.8	0.277	8.579	1.812	100.508		0.757956	0.136708	0.105337	0.00492116
LCM-13	1a	63.978	22.814	0.313399	3.427	0.237	8.627	1.487	100.883		0.750223	0.164692	0.0850856	0.0041476
LCM-13	1b	63.872	22.676	0.251164	3.395	0.221	8.451	1.494	100.36		0.747203	0.165882	0.0869152	0.0039331
LCM-13	1c	64.609	22.806	0.295618	3.116	0.218	8.566	1.634	101.245		0.753843	0.15154	0.0946171	0.00386191
LCM-13	2a	64.595	19.893	0.248941	0.324	2.047	4.614	8.994	100.716		0.430774	0.0167165	0.552509	0.037184
LCM-13	2b	64.852	19.709	0.364521	0.322	1.899	4.74	9.014	100.901		0.436907	0.0164019	0.546692	0.0341635
LCM-13	2c	64.682	19.708	0.293395	0.273	1.822	4.503	9.252	100.533		0.419214	0.0140451	0.566741	0.0331413
LCM-13	3b	63.794	22.373	0.277836	3.202	0.114	9.027	1.013	99.8008		0.787488	0.154365	0.0581466	0.00200566
LCM-13	4a	64.796	20.094	0.17337	0.422	1.915	4.955	8.611	100.966		0.45651	0.0214855	0.522005	0.0344258
LCM-13	4b	65.153	20.214	0.213378	0.421	1.996	4.693	8.719	101.409		0.440136	0.0218196	0.538044	0.0364498
LCM-13	4c	64.563	19.461	0.17337	0.364	1.55	4.906	8.867	99.8844		0.448385	0.0183845	0.53323	0.0278305
LCM-13	5a	65.846	20.76	0.367855	1.974	0.089	9.02	1.77	99.8269		0.799964	0.0967473	0.103289	0.00159252
LCM-13	5b	64.478	22.807	0.502328	3.488	0.107	8.462	1.202	101.046		0.756858	0.172403	0.0707392	0.00193023
LCM-13	6a	63.413	23.64	0.282281	4.116	0.206	8.265	1.101	101.023		0.733752	0.201934	0.0643144	0.00368209
LCM-13	6b	62.603	23.761	0.326735	4.366	0.2	8.258	1.115	100.63		0.724107	0.211563	0.0643306	0.00353138
LCM-13	7a	65.804	20.05	1.05355	1.398	0.144	9.433	1.717	99.5996		0.832178	0.0681555	0.0996669	0.00256058
LCM-13	7b	66.009	20.206	0.846844	1.421	0.095	9.56	1.54	99.6778		0.841655	0.069135	0.0892096	0.00168729
LCM-13	7c	65.905	20.68	0.667918	1.508	0.081	9.261	1.61	99.7129		0.830307	0.0747153	0.0949776	0.00146539
LCM-13	8a	64.884	21.825	0.447872	2.504	0.207	8.56	1.99	100.418		0.760676	0.122967	0.116357	0.00370347
LCM-13	8a	64.213	21.94	0.220046	2.79	0.289	8.472	1.988	99.912		0.748285	0.13618	0.115535	0.00513178
LCM-13	9a	63.412	22.716	0.233382	3.376	0.28	8.467	1.543	100.027		0.746128	0.164405	0.0894673	0.00496141
LCM-13	9a	63.783	22.576	0.192263	3.463	0.276	8.348	1.43	100.068		0.745181	0.170828	0.0839905	0.00495399
LCM-13	9c	64.294	22.675	0.313399	3.523	0.287	8.427	1.524	101.043		0.740728	0.17113	0.0881425	0.00507204
LCM-14	feld-1 ore	60.918	24.533	0.220046	6.074	0.018	7.368	0.644	99.775		0.660904	0.301087	0.0380093	0.000326169
LCM-14	feld2edge	59.094	25.687	0.365632	7.216	0.062	6.899	0.45	99.7736		0.616929	0.356593	0.0264775	0.00111912
LCM-14	feld2enter	56.045	27.291	0.417866	9.496	0.061	5.868	0.305	99.4839		0.518541	0.463725	0.017734	0.00108811
LCM-14	feld3edge	59.48	25.881	0.480101	7.344	0.038	6.895	0.537	100.655		0.609811	0.358939	0.03125	0.000678692
LCM-14	feld3enter	59.45	25.658	0.330069	7.195	0.085	6.783	0.565	100.066		0.609386	0.357215	0.033399	0.00154079
LCM-14	feld4enter	58.11	25.913	0.361187	7.075	0.087	7.016	0.559	99.1212		0.621236	0.346195	0.0325682	0.0015543
LCM-14	feld5edge	60.409	24.267	0.307842	5.385	0.096	8.066	0.779	99.3098		0.698087	0.257552	0.0443612	0.00167617
LCM-14	feld6edge	53.856	29.408	0.523443	11.41	0.033	4.657	0.24	100.127		0.418783	0.567017	0.0142007	0.000599321
LCM-14	feld6enter	54.147	28.957	0.611239	11.178	0.042	4.923	0.272	100.13		0.436468	0.547664	0.0158674	0.000751915
LCM-14	feld7enter	58.074	26.711	0.386748	7.947	0.044	6.693	0.471	100.327		0.587384	0.385418	0.027198	0.00077972
LCM-14	feld8edge	61.417	24.277	0.228937	5.361	0.08	7.893	0.005	99.2619		0.72687	0.272827	0.00030297	0.00148656
LCM-14	feld8enter	58.316	26.382	0.118914	7.671	0.064	6.723	0.472	99.7469		0.596395	0.376054	0.0275504	0.00114598
LCM-15	5	62.895	23.204	0.261166	4.537	0.212	8.217	0.999	100.325		0.721957	0.22029	0.0577535	0.00374995
LCM-15	11a	54.179	28.627	0.92575	11.339	0	4.689	0.343	100.103		0.419377	0.560437	0.0201852	0
LCM-15	11b	53.645	29.754	0.862403	12.295	0.002	4.306	0.328	101.192		0.380513	0.600415	0.0190715	3.57136e-05
LCM-15	12a	59.755	26.389	0.296729	7.875	0.031	6.714	0.589	101.65		0.586199	0.379964	0.0338372	0.000546653
LCM-15	12b	60.923	25.597	0.320067	7.024	0.045	7.291	0.706	101.906		0.626528	0.333554	0.0399184	0.000780819
LCM-15	13a	64.193	22.732	0.265611	3.625	0.201	8.455	1.327	100.799		0.746157	0.176788	0.0770552	0.00357176
LCM-15	5b	63.045	23.273	0.368966	4.487	0.2	8.181	0.995	100.55		0.723003	0.219138	0.0578591	0.00355909
LCM-15	7a	53.74	29.1	0.637912	11.656	0.055	4.669	0.293	100.151		0.413071	0.569873	0.0170562	0.000982336
LCM-15	7b	57.771	26.624	0.507884	9.102	0.1	5.858	0.464	100.427		0.523351	0.449374	0.0272757	0.00180212
LCM-17		62.471	23.602	0.23116	4.919	0.132	7.942	0.9	100.197		0.705797	0.241576	0.0526268	0.00236493
LCM-17		59.886	25.479	0.308954	7.143	0.046	7.012	0.487	100.362		0.621642	0.34995	0.0284081	0.000823421
LCM-17		59.14	25.656	0.327847	7.422	0.114	6.463	0.886	100.009		0.57977	0.367934	0.0522962	0.00206231
LCM-17		59.612	25.831	0.275613	7.769	0.025	6.558	0.436	100.507		0.588785	0.385459	0.0257565	0.000453369
LCM-17		59.27	25.659	0.383414	7.842	0.053	6.486	0.441	100.134		0.583808	0.390074	0.0261184	0.000963105
LCM-17		58.657	26.074	0.402307	7.972	0.049	6.505	0.42	100.079		0.581486	0.39381	0.0247034	0.000884357
LCM-17		58.592	25.708	0.391193	8.05	0.085	6.569	0.38	99.7752		0.582997	0.394812	0.0221904	0.00152212
LCM-17		58.918	26.091	0.250053	8.212	0.049	6.48	0.44	100.44		0.573064	0.401333	0.0256033	0.000874918
LCM-17		58.631	25.609	0.33896	8.251	0.03	6.529	0.405	99.794		0.574981	0.401551	0.023468	0.000533605
LCM-17		58.171	25.917	0.38008	8.324	0.087	6.324	0.403	99.6061		0.565189	0.411113	0.0236985	0.00156878
LCM-17		57.982	26.437	0.402307	8.471	0.011	6.263	0.365	99.9313		0.559975	0.418551	0.0214731	0.000198709
LCM-17		58.358	26.442	0.517887	8.638	0.074	6.242	0.371	100.643		0.554369	0.423951	0.0216802	0.00132634
LCM-17		58.11	26.331	0.410086	8.7	0.008	6.246	0.362	100.167		0.553135	0.425771	0.0210937	0.000143146
LCM-17		57.528	26.301	0.410086	8.699	0.051	6.196	0.373	99.5581		0.55082	0.427361	0.0218184	0.000915365
LCM-17		58.541	26.421	0.465653	8.749	0.059	6.208	0.384	100.828		0.549597	0.428034	0.0223686	0.00105441
LCM-17		58.078	26.446	0.391193	8.752	0.05	6.194	0.384	100.295		0.548957	0.42865	0.0223931	0.000894689
LCM-17		57.775	26.259	0.324513	8.831	0.097	6.202	0.393	99.8815		0.546876	0.430323	0.0228015	0.00172545
LCM-17		58.499	26.74	0.327847	8.842	0.04	6.155	0.382	100.986		0.545046	0.432696	0.0222578	0.000715283
LCM-17		58.254	26.576	0.525666	8.794	0.05	6.116	0.368	100.684		0.545201	0.433214	0.021585	0.000899894
LCM-17		57.159	26.67	0.394527	8.857	0.082	6.141	0.361	99.6645		0.544748	0.434181	0.0210707	0.00146776
LCM-17		57.638	26.518	0.3723	8.779	0.057	6.076	0.368	99.8083		0.543977	0.434345	0.0216783	0.00103018
LCM-17		57.953	26.329	0.291172	8.858	0.068	6.094	0.372	99.9652		0.542466	0.435746	0.0217885	0.00122172
LCM-17		57.595	26.674	0.428979	8.958	0.028	6.162	0.377	100.223		0.542409	0.435756	0.0218354	0.000497817
LCM-17		57.967	26.315	0.417866	8.92	0.065	6.101	0.36	100.146		0.541481	0.437496	0.0210232	0.00116443
LCM-17		58.687	26.975	0.476767	8.821	0.085	6.025	0.351	101.421		0.541299	0.437951	0.0207492	0.00154082
LCM-17		57.818	26.695	0.351185	8.905	0.031	6.08	0.349	100.229		0.541372	0.438181	0.0204471	0.000557487
LCM-17		57.797	26.523	0.294506	8.947	0	6.091	0.346	99.9985		0.540799	0.438988	0.0202133	0
LCM-17		57.526	26.944	0.427868	8.925	0.01	6.05	0.383	100.266		0.538536	0.439031	0.0224323	0.000179848
LCM-17		57.775	26.554	0.387859	8.951	0.05	6.018	0.347	100.083		0.537665	0.441936	0.0203988	0.000901907
LCM-17		57.92	26.524	0.357853	9.037	0.082	6.058	0.352	100.331		0.536883	0.442591	0.0205262	0.00146639
LCM-17		57.407	26.766	0.410086	9.089	0.032	6.025	0.365	100.094		0.533756	0.444968	0.0212761	0.000572546
LCM-17		57.519	26.591	0.432313	8.991	0.066	5.954	0.353	99.9063		0.533757	0.445421	0.0208221	0.00119422
LCM-17		57.941	26.753	0.302286	9.064	0.082	5.991	0.351	100.484		0.533438	0.445998	0.020564	0.00147327
LCM-17		57.438	26.922	0.451206	9.077	0.016	5.987	0.362	100.253		0.532588	0.446223	0.0211888	0.000287542
LCM-17		57.301	26.657	0.462319	9.117	0.043	5.992	0.329	99.9013		0.532777	0.447975	0.019248	0.000772023
LCM-17		57.452	26.597	0.402307	9.074	0.05	5.933	0.345	99.8533		0.530941	0.448744	0.0203145	0.000903386
LCM-17		57.548	26.776	0.350074	9.056	0.048	5.91	0.346	100.034		0.530416	0.449152	0.0204324	0.000869793
LCM-17		57.693	26.882	0.424534	9.221	0.023	5.986	0.325	100.555		0.529943	0.451126	0.0189317	0.000411306
LCM-17		57.056	26.988	0.432313	9.277	0.04	5.971	0.333	100.097		0.527624	0.453015	0.0193614	0.000713757
LCM-17		57.462	27.09	0.410086	9.325	0.005	5.879	0.345	100.516		0.522151	0.457687	0.0201617	8.97319e-05
LCM-17		56.873	27.327	0.473433	9.536	0.032	5.668	0.332	100.241		0.508056	0.472363	0.019581	0.0005793
LCM-17		57.137	27.612	0.551227	9.574	0	5.591	0.311	100.776		0.50431	0.477232	0.0184579	0
LCM-17		56.336	27.517	0.468987	10.011	0.008	5.679	0.31	100.33		0.497492	0.48464	0.0178686	0.000141601
LCM-17		56.301	27.488	0.387859	9.928	0.008	5.586	0.304	100.003		0.495544	0.486711	0.0177448	0.000143395
LCM-17		56.491	27.632	0.45454	9.925	0.081	5.564	0.295	100.443		0.494891	0.487844	0.0172647	0.00145378
LCM-17		56.077	27.981	0.410086	9.925	0.01	5.499	0.291	100.193		0.49207	0.490796	0.0171337	0.000180796
LCM-17		56.37	27.397	0.33896	10.031	0.063	5.44	0.303	99.943		0.486465	0.495707	0.0178283	0.00113716
LCM-17		56.017	27.632	0.361187	10.101	0.02	5.429	0.281	99.8412		0.484909	0.498577	0.0165143	0.000360858
LCM-17		54.904	28.383	0.480101	11.107	0.033	5.051	0.223	100.181		0.445584	0.541472	0.0129441	0.000587941
LCM-17		54.755	28.287	0.432313	11.207	0	5.078	0.24	99.9993		0.444303	0.54188	0.013817	0
LCM-18	1	60.875	24.705	0.174481	6.742	0.055	7.047	0.741	100.339		0.625825	0.330876	0.0432994	0.000986067
LCM-18	1	60.796	25.026	0.255609	6.76	0.011	6.986	0.745	100.58		0.623087	0.333192	0.0437211	0.000198221
LCM-18	1	60.581	25.041	0.242273	7.073	0.041	6.818	0.7	100.496		0.609442	0.349387	0.0411707	0.000740051
LCM-18	2	54.099	28.5	0.486769	11.581	0.024	4.787	0.326	99.8038		0.41986	0.561326	0.0188137	0.000425198
LCM-18	2	51.518	30.089	0.594569	13.444	0	3.497	0.19	99.3326		0.316429	0.672259	0.0113122	0
LCM-18	2	51.306	30.72	0.473433	13.768	0.006	3.417	0.171	99.8614		0.306787	0.683111	0.0101019	0.000108848
LCM-18	3	58.33	26.266	0.236716	8.658	0.032	6.204	0.521	100.248		0.547505	0.422242	0.030253	0.000570351
LCM-18	3	57.363	26.659	0.375634	9.277	0.025	5.791	0.425	99.9156		0.517178	0.457848	0.0249741	0.000450976
LCM-18	3	57.57	26.789	0.304508	9.383	0.021	5.788	0.429	100.285		0.514237	0.460685	0.0250788	0.000376889
LCM-18	4	60.817	24.629	0.233382	6.556	0.041	7.225	0.816	100.317		0.634613	0.318227	0.0471602	0.000727214
LCM-18	4	60.676	24.671	0.187817	7.062	0.087	7.042	0.684	100.41		0.618008	0.342494	0.0394974	0.00154053
LCM-18	4	60.645	25.149	0.291172	7.08	0.025	6.816	0.693	100.699		0.609413	0.349818	0.040769	0.000451491
LCM-18	5	61.948	23.92	0.161145	5.679	0	7.49	0.863	100.061		0.668978	0.280304	0.0507173	0
LCM-18	5	61.889	24.109	0.218935	5.944	0.038	7.598	0.881	100.678		0.662859	0.286568	0.0505723	0.000669481
LCM-18	5	62.183	23.863	0.183372	5.99	0.059	7.559	0.855	100.692		0.661227	0.289561	0.0492116	0.00104186
LCM-18	6	63.923	22.918	0.251164	4.335	0.207	8.626	0.864	101.124		0.744255	0.206695	0.0490502	0.00359618
LCM-18	6	63.212	23.326	0.251164	4.737	0.199	8.402	0.759	100.886		0.729392	0.227253	0.0433546	0.0034789
LCM-18	6	63.161	23.746	0.192263	5.121	0.133	8.23	0.713	101.296		0.713845	0.245463	0.0406919	0.00232578
LCM-18	7	62.571	23.456	0.161145	5.395	0.013	7.816	0.966	100.378		0.683635	0.260771	0.0555945	0.000229724
LCM-18	7	62.017	23.866	0.152254	5.582	0.006	7.545	0.928	100.096		0.671243	0.274434	0.0543229	0.000107857
LCM-18	7	61.915	23.825	0.103355	5.821	0.043	7.649	0.876	100.232		0.66849	0.281135	0.0503743	0.000758844
LCM-18	8	64.753	22.061	0.313399	3.407	0.342	8.854	1.141	100.871		0.770748	0.163898	0.0653542	0.00598023
LCM-18	8	64.848	22.263	0.147809	3.533	0.25	8.724	1.103	100.869		0.765118	0.171232	0.0636506	0.00441119
LCM-18	8	64.36	22.198	0.233382	3.703	0.237	8.925	1.038	100.694		0.765809	0.175587	0.0586036	0.00409263
LCM-18	9	57.078	26.772	0.251164	9.257	0.018	5.809	0.459	99.6442		0.51743	0.455668	0.0269016	0.000323896
LCM-18	9	57.301	26.959	0.388971	9.366	0.088	5.839	0.444	100.386		0.516406	0.457757	0.0258375	0.00157028
LCM-18	9	54.771	28.824	0.523443	11.409	0.049	4.649	0.309	100.534		0.416683	0.565094	0.018223	0.000886707
LCM-18	10	61.766	24.235	0.183372	5.933	0.051	7.628	0.798	100.594		0.667263	0.286806	0.0459308	0.000900718
LCM-18	10	61.968	24.082	0.2645	6.018	0.042	7.388	0.858	100.62		0.655068	0.294876	0.0500566	0.000751978
LCM-18	10	61.337	24.124	0.286727	6.257	0.03	7.414	0.825	100.274		0.64952	0.302924	0.0475563	0.000530828
LCM-18	11	51.965	30.514	0.563452	13.578	0	3.639	0.27	100.529		0.321462	0.662844	0.0156937	0
LCM-18	11	52.075	30.375	0.576788	13.483	0.018	3.569	0.282	100.379		0.318503	0.664938	0.0165589	0.000324506
LCM-18	11	50.935	31.106	0.491214	14.329	0.066	3.366	0.225	100.518		0.294422	0.692628	0.0129495	0.00116525
LCM-20	8	61.412	24.097	0.216	5.571	0	7.328	0.935	99.559		0.66486	0.279322	0.0558176	0
LCM-20	1	54.959	28.61	0.307	10.248	0	5.185	0.423	99.732		0.466001	0.508985	0.0250146	0
LCM-20	2	53.703	28.835	0.42	11.169	0.015	4.801	0.313	99.256		0.429459	0.552118	0.0184225	0.000271074
LCM-20	2	52.382	29.756	0.302	12.213	0.046	4.221	0.241	99.161		0.379288	0.606463	0.014249	0.000834589
LCM-20	4	55.025	28.458	0.334	10.176	0.018	5.173	0.432	99.616		0.466847	0.507501	0.0256525	0.00032816
LCM-20	6	60.164	25.045	0.146	6.381	0.065	7.077	0.796	99.674		0.636019	0.316911	0.0470705	0.00117909
LCM-20	6	57.96	25.933	0.216	7.641	0.057	6.471	0.618	98.896		0.582962	0.380405	0.0366329	0.00103661
LCM-20	7	60.035	24.294	0.279	5.629	0.09	7.541	0.583	98.451		0.683352	0.281887	0.0347615	0.00164538
LCM-20	8	58.299	26.239	0.276	7.603	0.033	6.487	0.608	99.545		0.585013	0.378909	0.0360778	0.000601033
LCM-20	9	59.879	24.743	0.165	6.254	0.037	7.205	0.467	98.75		0.656889	0.315096	0.0280149	0.00068122
LCM-20	9	59.709	25.014	0.228	6.361	0.079	7.333	0.45	99.174		0.658004	0.315428	0.0265689	0.00143046
LCM-20	10	54.657	26.078	0.366	8.774	0	5.893	0.314	96.082		0.538257	0.442872	0.0188711	0
LCM-22	10a	60.378	23.922	0.273391	5.126	0.144	8.254	0.979	99.0764		0.703612	0.241476	0.0549118	0.00247445
LCM-22	10b	60.301	24.387	0.398973	5.724	0.12	7.883	0.799	99.613		0.681217	0.273351	0.0454313	0.00209117
LCM-22	11a	59.69	25.434	0.47121	6.833	0.113	6.967	0.763	100.271		0.619559	0.335796	0.0446453	0.00202655
LCM-22	11b	60.19	25.076	0.462319	6.584	0.111	7.073	0.79	100.286		0.62976	0.323958	0.0462821	0.0019932
LCM-22	12a	63.506	19.776	0.244496	0.306	2.799	3.968	9.647	100.246		0.378458	0.0161285	0.605414	0.0511862
LCM-22	12b	63.684	19.818	0.18226	0.282	2.687	3.935	9.838	100.426		0.372489	0.0147518	0.612759	0.0488868
LCM-22	13a	59.001	25.684	0.350074	6.973	0.068	7.034	0.684	99.7941		0.62042	0.339884	0.0396967	0.00121057
LCM-22	13b	59.407	25.836	0.341183	6.958	0.089	7.051	0.71	100.392		0.620506	0.338382	0.041112	0.00158024
LCM-22	14a	62.129	23.922	0.287838	4.758	0.122	8.045	1.009	100.273		0.709543	0.231902	0.0585543	0.00216967
LCM-22	14b	61.318	24.41	0.398973	5.243	0.139	8.022	0.893	100.424		0.697143	0.251795	0.0510629	0.00243511
LCM-22	6a	62.706	23.595	0.178926	4.428	0.154	8.175	1.21	100.447		0.715964	0.214308	0.0697274	0.0027181
LCM-22	6b	62.754	23.246	0.291172	4.401	0.239	8.14	1.224	100.295		0.71545	0.213764	0.0707866	0.00422704
LCM-22	7a	63.822	23.15	0.246718	3.807	0.203	8.296	1.382	100.907		0.733565	0.186029	0.0804067	0.00361424
LCM-22	7b	62.231	23.691	0.286727	4.446	0.171	8.179	1.143	100.148		0.71821	0.215749	0.0660408	0.00302521
LCM-22	8a	61.067	24.922	0.178926	5.785	0.166	7.662	0.867	100.648		0.670377	0.27971	0.0499127	0.00292642
LCM-22	8b	62.398	23.665	0.327847	4.517	0.144	7.988	1.216	100.256		0.707886	0.221209	0.0709045	0.00257213
LCM-22	9a	62.978	23.47	0.313399	4.393	0.149	8.278	1.179	100.76		0.720991	0.211443	0.0675667	0.00261563
LCM-22	9b	62.568	23.683	0.336737	4.531	0.171	8.204	1.111	100.605		0.717199	0.218895	0.0639062	0.00301178
LCM-22		57.893	25.827	0.469769	7.632	0.085	7.149	0.787	99.8428		0.601543	0.354885	0.0435723	0.00144323
LCM-22		60.464	23.773	0.39129	5.691	0.161	8.037	1.264	99.7813		0.668989	0.261783	0.0692287	0.00270084
LCM-22		59.971	24.89	0.460926	6.451	0.144	7.549	0.806	100.272		0.6483	0.306155	0.0455446	0.00249281
LCM-22		59.233	25.298	0.365867	7.137	0.199	7.491	0.679	100.403		0.630459	0.33194	0.0376012	0.00337307
LCM-22		63.396	22.513	0.274124	3.704	0.137	8.897	1.396	100.317		0.750013	0.172554	0.0774329	0.0023284
LCM-22		62.417	23.251	0.291809	4.529	0.097	8.434	1.16	100.18		0.72085	0.213915	0.0652355	0.00167255
LCM-22		61.952	24.119	0.278545	4.959	0.13	8.57	1.023	101.032		0.715146	0.228684	0.05617	0.00218741
LCM-22		61.492	23.263	0.426661	4.704	0.273	8.409	1.252	99.8197		0.71068	0.219697	0.0696224	0.00464083
LCM-22		62.047	23.403	0.330496	4.738	0.245	8.265	1.152	100.18		0.709971	0.224916	0.0651126	0.00423491
LCM-22		58.72	25.298	0.339339	7.054	0.065	7.48	0.788	99.7443		0.628747	0.32767	0.0435828	0.00110289
LCM-22		60.765	24.242	0.426661	5.706	0.166	7.903	1.065	100.274		0.672195	0.268202	0.0596029	0.0028451
LCM-22		62.047	23.46	0.413396	4.555	0.163	8.722	1.144	100.504		0.727323	0.209907	0.06277	0.00273925
LCM-22		61.793	23.044	0.296231	4.665	0.135	8.384	1.085	99.4022		0.718061	0.220795	0.0611441	0.00233106
LCM-22		62.612	23.727	0.291809	4.553	0.141	8.468	1.118	100.911		0.722544	0.214688	0.0627682	0.00242533
LCM-22		61.952	22.832	0.348182	4.325	0.166	8.763	1.113	99.4992		0.73729	0.201094	0.0616162	0.00281445
LCM-23	2	60.747	24.364	0.232271	5.715	0.053	7.615	0.618	99.3443		0.681135	0.282493	0.036372	0.000957077
LCM-23	2	60.748	24.181	0.161145	5.845	0.073	7.441	0.619	99.0681		0.67167	0.291566	0.0367646	0.00132982
LCM-23	3	61.196	23.885	0.256721	5.016	0.119	7.837	0.753	99.0627		0.705756	0.249626	0.0446184	0.0021609
LCM-23	3	61.502	23.909	0.185595	5.02	0.177	7.757	0.76	99.3106		0.703186	0.251482	0.045332	0.00323197
LCM-23	6	58.417	26.194	0.287838	7.935	0.072	6.518	0.424	99.8478		0.582899	0.392151	0.0249494	0.00129948
LCM-23	7	61.495	23.652	0.114468	5.422	0.067	7.699	0.663	99.1125		0.691637	0.269173	0.0391897	0.00121483
LCM-23	7	61.538	23.886	0.161145	5.554	0.029	7.735	0.661	99.5641		0.688217	0.273085	0.0386974	0.000521147
LCM-23	7	61.204	24.552	0.188929	5.657	0.084	7.677	0.618	99.9809		0.684846	0.278879	0.0362748	0.00151198
LCM-23		67.042	19.195	0.448983	0.153	0	6.745	6.597	100.181		0.603835	0.0075693	0.388595	0
LCM-23		66.136	19.084	0.41342	0.159	0.006	6.896	6.706	99.4004		0.605109	0.00771011	0.387181	0.000106381	0.692628
LCM-26	1	61.352	24.072	0.183372	5.586	0.085	7.396	1.038	99.7124		0.662372	0.276461	0.061167	0.00153596
LCM-26	1	60.337	24.613	0.362298	6.908	0.1	6.933	0.811	100.064		0.614403	0.338308	0.0472898	0.00178763
LCM-26	1	59.705	24.838	0.268945	7.103	0.084	6.842	0.803	99.6439		0.605721	0.347503	0.0467756	0.00150051
LCM-26	2	61.567	23.578	0.416754	5.936	0.114	7.483	1.011	100.106		0.654762	0.287031	0.0582068	0.00201169
LCM-26	2	61.612	23.956	0.22338	6.085	0.18	7.603	0.94	100.599		0.656325	0.290283	0.053392	0.00313017
LCM-26	2	61.357	23.872	0.483435	6.029	0.139	7.404	1.049	100.333		0.647997	0.291595	0.0604083	0.00245233
LCM-26	3	61.313	23.334	0.362298	5.851	0.117	7.441	1.075	99.4933		0.653768	0.284086	0.0621463	0.002073
LCM-26	3	61.778	23.971	0.381191	5.959	0.138	7.471	1.001	100.699		0.654048	0.288291	0.0576607	0.00243542
LCM-26	3	60.865	23.611	0.308954	6.043	0.088	7.253	1.01	99.179		0.644307	0.296658	0.0590352	0.00157723
LCM-26	4	63.38	22.912	0.434536	4.498	0.154	8.338	0.989	100.706		0.726659	0.216629	0.0567126	0.00270481
LCM-26	4	62.706	23.183	0.376746	5.07	0.105	8.25	0.841	100.532		0.710891	0.241426	0.0476826	0.00182502
LCM-26	4	62.371	23.314	0.201153	5.106	0.109	8.087	0.842	100.03		0.705505	0.246162	0.0483325	0.00191791
LCM-26	5	62.293	23.398	0.304508	5.249	0.167	8.378	0.832	100.622		0.70843	0.245279	0.0462908	0.0028455
LCM-26	5	62.325	23.8	0.2645	5.324	0.175	8.056	0.792	100.736		0.699349	0.255411	0.0452392	0.00306059
LCM-26	5	62.125	23.777	0.174481	5.569	0.128	7.788	0.762	100.323		0.685145	0.270746	0.0441089	0.0022704
LCM-26	6	62.546	23.464	0.300063	5.292	0.132	7.784	0.865	100.383		0.690216	0.259316	0.0504676	0.00235968
LCM-26	6	62.14	23.799	0.348962	5.551	0.051	7.965	0.856	100.711		0.686885	0.264543	0.0485721	0.000887985
LCM-26	6	61.896	24.353	0.291172	6.067	0.095	7.631	0.677	101.01		0.667675	0.29335	0.0389751	0.00167688
LCM-26	7	62.513	23.531	0.317845	5.34	0.138	7.832	1.236	100.908		0.67539	0.254478	0.0701318	0.00239906
LCM-26	7	62.482	23.665	0.295618	5.277	0.14	7.666	1.26	100.786		0.671794	0.255553	0.0726528	0.00247311
LCM-26	7	61.979	23.563	0.398973	5.554	0.15	7.52	1.239	100.404		0.659389	0.269127	0.0714842	0.00265085
LCM-26	8	61.945	23.702	0.366744	5.5	0.174	7.72	1.161	100.569		0.669945	0.263762	0.0662932	0.00304209
LCM-26	8	62.086	23.363	0.326735	5.601	0.116	7.584	1.135	100.212		0.663747	0.270893	0.0653604	0.00204737
LCM-26	8	62.188	23.721	0.313399	5.557	0.144	7.428	1.124	100.475		0.660943	0.27325	0.0658071	0.00258259
LCM-26	9	58.039	27.06	0.492326	9.185	0.071	6.115	0.551	101.513		0.529283	0.439337	0.0313803	0.00124032
LCM-26	9	57.469	26.712	0.443426	9.165	0.081	5.801	0.503	100.174		0.518097	0.452344	0.0295591	0.00145976
LCM-26	9	56.883	27.267	0.388971	9.517	0.018	5.748	0.481	100.303		0.507604	0.464447	0.0279491	0.000321118
LCM-26	10	62.61	23.388	0.326735	4.819	0.199	8.057	0.99	100.39		0.708527	0.234189	0.0572839	0.00352392
LCM-26	10	62.848	22.894	0.187817	4.8	0.188	7.982	1.032	99.9318		0.705521	0.234459	0.0600196	0.00334675
LCM-26	10	62.685	22.889	0.335626	4.946	0.159	7.863	0.998	99.8756		0.698751	0.242894	0.0583552	0.00284719
LCM-26	11	64.703	18.927	0.160034	0.264	1.961	3.923	10.149	100.087		0.36504	0.0135754	0.621384	0.0355629
LCM-26	11	63.78	18.939	0.266723	0.295	2.329	3.832	10.003	99.4447		0.362301	0.0154132	0.622285	0.042602
LCM-26	11	64.231	21.628	0.210044	3.291	0.15	8.376	1.407	99.293		0.753206	0.163543	0.0832504	0.00271838
LCM-27	10a	60.903	25.439	0.337849	5.926	0.129	7.882	0.688	101.305		0.678925	0.282082	0.0389932	0.0022404
LCM-27	10b	60.045	26.17	0.216712	6.935	0.118	7.423	0.564	101.472		0.638454	0.329628	0.0319186	0.00204675
LCM-27	11a	67.767	19.217	0.662361	0.093	0	7.549	6.306	101.594		0.642488	0.00437407	0.353138	0
LCM-27	11b	68.003	19.095	0.550116	0.123	0.051	7.641	5.823	101.286		0.662108	0.00588995	0.332002	0.000892246
LCM-27	1a	57.88	27.35	0.24783	8.456	0.111	6.576	0.408	101.029		0.570961	0.40573	0.0233088	0.00194378
LCM-27	1b	60.46	25.862	0.216712	6.447	0.098	7.647	0.601	101.332		0.658929	0.306996	0.0340751	0.00170356
LCM-27	4a	65.048	22.377	0.28895	2.915	0.157	9.235	1.49	101.511		0.780888	0.136213	0.0828996	0.00267554
LCM-27	4b	65.042	21.718	0.252275	2.738	0.072	9.018	1.592	100.432		0.778852	0.130679	0.0904695	0.00125503
LCM-27	5a	63.029	22.941	0.29784	4.04	0.141	8.606	1.038	100.093		0.746946	0.193775	0.0592789	0.00246694
LCM-27	5b	63.452	22.998	0.243384	4.108	0.162	8.731	1.009	100.703		0.748474	0.194612	0.0569139	0.00279856
LCM-27	6a	67.652	19.396	0.351185	0.22	0.137	7.453	6.324	101.533		0.635073	0.0103596	0.354568	0.00235349
LCM-27	7a	60.059	25.669	0.35563	6.702	0.128	7.274	0.76	100.948		0.633749	0.322683	0.0435684	0.00224853
LCM-27	7b	59.453	25.712	0.324513	7.105	0.087	7.068	0.732	100.482		0.615893	0.342137	0.0419696	0.00152963
LCM-27	8a	67.862	19.375	0.333403	0.26	0.004	7.724	5.878	101.436		0.658185	0.0122435	0.329572	6.88746e-05
LCM-27	8b	67.393	19.685	0.280059	0.254	0.038	7.901	5.932	101.483		0.661475	0.0117515	0.326774	0.000642479
LCM-27	9a	64.79	21.777	0.212267	2.684	0.122	9.125	1.585	100.295		0.783185	0.127304	0.0895108	0.00211153
LCM-27		68.171	18.744	0.457874	0.161	0	6.775	6.658	100.967		0.602499	0.00791227	0.389588	0
LCM-27		67.807	18.74	0.447872	0.171	0	7.029	6.148	100.343		0.629344	0.00846093	0.362195	0
LCM-27		67.901	18.588	0.431202	0.176	0.005	6.971	6.525	100.597		0.613558	0.00856053	0.377882	8.89233e-05
LCM-27		67.608	18.67	0.427868	0.175	0.008	6.887	6.492	100.268		0.611888	0.00859226	0.37952	0.000143613
LCM-27		68.692	18.836	0.365632	0.181	0.008	6.62	6.597	101.3		0.598513	0.0090432	0.392443	0.000146139
LCM-27		67.568	18.568	0.357853	0.189	0	7.256	6.092	100.031		0.638234	0.00918696	0.352579	0
LCM-27		67.595	18.579	0.345628	0.187	0.055	6.7	6.701	100.163		0.597548	0.00921653	0.393235	0.000990271
LCM-27		67.613	18.572	0.424534	0.191	0.017	6.724	6.679	100.221		0.599062	0.00940383	0.391534	0.000305973
LCM-27		67.147	18.891	0.33896	0.201	0	6.92	6.527	100.025		0.610998	0.00980748	0.379194	0
LCM-27		67.757	18.698	0.375634	0.208	0.017	6.954	6.396	100.406		0.616631	0.0101925	0.373176	0.000304531
LCM-27		67.446	18.868	0.220046	0.297	0.182	6.768	6.474	100.255		0.604722	0.0146649	0.380613	0.00327541
LCM-27		65.527	21.226	0.256721	2.486	0.123	8.702	1.811	100.132		0.772315	0.121928	0.105757	0.00220114
LCM-27		65.537	21.191	0.275613	2.496	0.14	8.736	1.802	100.178		0.773027	0.122055	0.104918	0.00249717
LCM-27		65.352	21.352	0.208933	2.506	0.138	8.749	1.808	100.114		0.772641	0.1223	0.105059	0.00245671
LCM-27		65.788	20.967	0.175592	2.508	0.126	8.612	1.856	100.033		0.767613	0.123536	0.108851	0.00226437
LCM-27		65.458	21.363	0.261166	2.586	0.114	8.676	1.808	100.266		0.768147	0.126526	0.105327	0.00203549
LCM-27		64.074	22.118	0.197819	3.788	0.037	8.533	0.984	99.7318		0.756889	0.185681	0.0574302	0.000662777
LCM-27		63.749	22.069	0.343405	3.791	0.125	8.302	1.113	99.4924		0.745957	0.18824	0.0658023	0.00226454
LCM-27		64.046	22.56	0.320067	3.973	0.083	8.485	1.076	100.543		0.745046	0.192787	0.0621668	0.0014706
LCM-27		63.236	22.594	0.220046	4.064	0.11	8.291	1.018	99.533		0.739827	0.200403	0.0597703	0.00197961
LCM-27		62.667	22.765	0.301174	4.372	0.122	8.191	0.911	99.3292		0.730916	0.215595	0.0534889	0.00219513
LCM-27		63.214	22.978	0.250053	4.372	0.17	8.079	1.05	100.113		0.722246	0.215991	0.0617634	0.00306174
LCM-27		63.411	22.904	0.212267	4.474	0.173	8.146	0.947	100.267		0.724634	0.219937	0.0554292	0.00310024
LCM-27		63.242	23.381	0.283393	4.572	0.162	8.164	0.937	100.741		0.722023	0.223451	0.0545259	0.0028869
LCM-27		62.452	22.829	0.375634	4.621	0.15	8.098	0.89	99.4156		0.720638	0.227249	0.0521127	0.0026902
LCM-27		62.681	23.085	0.308954	4.684	0.183	8.033	0.893	99.868		0.716653	0.230927	0.05242	0.00328833
LCM-27		63.238	23.432	0.204487	4.698	0.138	8.001	0.932	100.643		0.713709	0.231589	0.0547025	0.00248142
LCM-27		62.727	22.952	0.316733	4.669	0.167	7.942	0.909	99.6827		0.71419	0.232025	0.0537851	0.00302557
LCM-27		63.175	23.438	0.208933	4.7	0.107	7.834	0.953	100.416		0.708422	0.234874	0.0567043	0.0019515
LCM-27		63.83	23.481	0.313399	4.74	0.117	7.843	0.854	101.178		0.711426	0.237604	0.0509706	0.00214006
LCM-27		63.998	23.491	0.208933	4.727	0.1	7.732	0.868	101.125		0.708359	0.239318	0.0523234	0.00184791
LCM-27		63.192	23.386	0.257832	4.94	0.123	7.916	0.813	100.628		0.707994	0.244162	0.0478442	0.00221813
LCM-27		63.394	23.878	0.253387	5.029	0.143	7.617	0.839	101.153		0.695732	0.253844	0.0504237	0.00263253
LCM-27		62.307	23.501	0.350074	5.26	0.113	7.755	0.894	100.18		0.689332	0.258381	0.0522876	0.00202567
LCM-27		61.87	23.593	0.250053	5.292	0.147	7.659	0.748	99.5591		0.691517	0.264045	0.0444373	0.00267491
LCM-27		61.723	23.564	0.331181	5.468	0.119	7.739	0.796	99.7402		0.685809	0.267778	0.0464137	0.00212649
LCM-27		61.579	24.005	0.22338	5.461	0.098	7.689	0.73	99.7854		0.687304	0.269761	0.0429355	0.0017671
LCM-27		61.671	24.08	0.226714	5.567	0.1	7.542	0.729	99.9157		0.679575	0.277204	0.0432208	0.00181754
LCM-27		61.412	23.965	0.316733	5.608	0.106	7.427	0.757	99.5917		0.6737	0.281118	0.0451818	0.00193928
LCM-27		60.169	24.537	0.178926	6.554	0.133	7.426	0.573	99.5709		0.649984	0.317016	0.0330002	0.00234694
LCM-27		60.471	24.645	0.391193	6.446	0.146	7.206	0.636	99.9412		0.644159	0.318432	0.0374085	0.00263046
LCM-27		59.695	25.03	0.301174	6.858	0.091	7.025	0.579	99.5792		0.627465	0.338507	0.034028	0.00163982
LCM-27		59.278	25.078	0.45454	7.37	0.115	6.719	0.608	99.6225		0.600346	0.363909	0.035745	0.00207213
LCM-27		59.247	25.789	0.226714	7.883	0	6.481	0.45	100.077		0.582122	0.391283	0.0265949	0
LCM-27		57.736	26.266	0.242273	8.605	0.094	6.177	0.369	99.4893		0.552747	0.425527	0.0217265	0.00169692
LCM-27		56.505	27.172	0.2645	9.216	0.072	5.835	0.351	99.4155		0.522901	0.456403	0.0206966	0.00130217
LCM-27		55.991	28.019	0.29784	10.027	0.049	5.366	0.294	100.044		0.483398	0.499175	0.0174267	0.000891224
LCM-27		55.787	27.773	0.513441	10.193	0.046	5.259	0.294	99.8654		0.474411	0.508138	0.0174507	0.000837856
LCM-29	1	66.817	19.668	0.0722374	0.298	0	11.624	0.156	98.6352		0.977519	0.0138488	0.00863195	0
LCM-29	1	67.006	20.365	0.00444538	0.463	0.019	11.626	0.11	99.5934		0.972542	0.0214036	0.0060546	0.000321082
LCM-29	1	67.696	20.704	0	0.468	0.03	11.614	0.111	100.623		0.972236	0.0216503	0.00611403	0.000507241
LCM-29	2	68.005	19.727	0.157811	0.084	0	11.849	0.075	99.8978		0.991982	0.00388624	0.00413141	0
LCM-29	2	67.355	20.041	0.0989097	0.239	0.001	11.8	0.094	99.6289		0.983831	0.0110119	0.00515681	1.68482e-05
LCM-29	3	68.161	20.092	0.0944643	0.039	0	11.863	0.072	100.321		0.994223	0.00180627	0.00397042	0
LCM-29	3	67.976	19.79	0.0589013	0.04	0.035	11.975	0.138	100.013		0.99066	0.00182867	0.00751178	0.000584772
LCM-29	3	67.791	19.677	0.0500105	0.044	0.136	11.86	0.11	99.668		0.991913	0.00203362	0.00605336	0.00229326
LCM-29	4	68.382	19.704	0	0.02	0	11.799	0.125	100.03		0.992155	0.000929377	0.00691606	0
LCM-29	4	67.635	20.179	0	0.113	0	11.675	0.077	99.679		0.990405	0.00529739	0.00429795	0
LCM-29	4	67.227	19.99	0.0411197	0.158	0.008	11.755	0.312	99.4911		0.975713	0.00724743	0.01704	0.00013417
LCM-29	5	68.141	19.879	0.203376	0.027	0.004	12.006	0.109	100.369		0.992835	0.00123387	0.00593089	6.68395e-05
LCM-29	5	67.587	19.815	0.067792	0.051	0.046	11.843	0.033	99.4428		0.995804	0.00236979	0.00182575	0.000781006
LCM-29	5	67.031	19.694	0.270057	0.488	0.12	11.723	0.055	99.3811		0.974572	0.0224193	0.00300852	0.0020119
LCM-29	6	67.438	19.387	0.306731	0.06	0.682	11.518	0.344	99.7357		0.977966	0.00281531	0.0192185	0.0115665
LCM-29	7	67.813	19.913	0.0633466	0.396	0.003	11.763	0.083	100.034		0.977281	0.0181813	0.00453727	5.03645e-05
LCM-29	7	67.284	20.009	0.0766828	0.602	0.033	11.539	0.157	99.7007		0.963592	0.0277811	0.0086266	0.000556571
LCM-29	7	67.591	19.541	0.0811281	0.632	0.045	11.804	0.122	99.8161		0.964889	0.0285491	0.0065618	0.000742782
LCM-29	8	63.361	18.793	0	0	0.322	0.451	16.374	99.301		0.0401788	0	0.959821	0.00576355
LCM-29	8	68.283	20.166	0.0177815	0.055	0	11.858	0.077	100.457		0.993211	0.00254578	0.00424361	0
LCM-29	8	67.386	20	0	0.065	0.047	11.959	0.083	99.54		0.992487	0.00298106	0.00453234	0.000787606
LCM-29	9	65.95	20.337	0.153366	1.09	0.02	10.592	0.863	99.0054		0.900512	0.0512113	0.0482766	0.000343491
LCM-29	9	66.319	20.496	0.140029	1.281	0.002	10.428	0.789	99.455		0.894719	0.0607383	0.0445428	3.46756e-05
LCM-29	10	65.048	19.338	0.296729	0.311	0.624	3.77	11.174	100.562		0.333801	0.0152172	0.650982	0.0110416
LCM-29	10	64.509	19.458	0.171147	0.368	0.714	3.764	10.996	99.9801		0.335995	0.0181534	0.645852	0.0127159
LCM-29	10	64.78	19.653	0.202265	0.389	0.743	3.748	11.014	100.529		0.334344	0.0191766	0.646479	0.0132169
LCM-29		59.698	25.064	0.243174	6.086	0.136	8.094	0.631	99.9522		0.681747	0.283282	0.0349707	0.0023095
LCM-29		59.943	25.488	0.321653	6.412	0.136	7.644	0.599	100.544		0.660016	0.305953	0.034031	0.00236737
LCM-29		58.416	26.052	0.303968	7.554	0.004	7.221	0.488	100.039		0.616305	0.35629	0.0274052	6.89846e-05
LCM-29		57.755	26.656	0.361446	8.177	0.083	6.921	0.422	100.375		0.590657	0.385646	0.023697	0.00142938
LCM-29		58.442	26.447	0.400132	7.91	0.078	6.919	0.601	100.797		0.592092	0.374068	0.0338404	0.00134703
LCM-29		59.205	25.011	0.334917	6.59	0.078	7.785	0.778	99.7819		0.652082	0.30504	0.0428783	0.00131853
LCM-29		60.16	25.34	0.269703	6.223	0.101	7.783	0.618	100.495		0.669298	0.295733	0.0349684	0.00175209
LCM-29		59.381	25.478	0.265281	6.464	0.106	7.984	0.603	100.281		0.667955	0.298851	0.0331939	0.00178887
LCM-29		55.796	27.616	0.238753	8.933	0.029	6.234	0.448	99.2948		0.543726	0.430564	0.0257102	0.000510873
LCM-29		57.042	27.456	0.312811	8.889	0.035	6.195	0.372	100.302		0.545718	0.43272	0.0215618	0.000622656
LCM-29		57.972	26.485	0.300652	7.342	0.03	7.039	0.471	99.6397		0.617118	0.355712	0.0271702	0.000531216
LCM-29		58.674	25.965	0.434398	7.181	0.108	7.324	0.535	100.221		0.628972	0.340797	0.0302309	0.00187076
LCM-29		58.791	26.184	0.373604	7.375	0.065	7.21	0.51	100.509		0.62042	0.350704	0.0288759	0.00112901
LCM-29		59.824	25.22	0.274124	6.284	0.103	7.717	0.605	100.027		0.665962	0.299685	0.0343535	0.00179301
LCM-29		55.271	27.755	0.339339	9.099	0.02	6.376	0.364	99.2243		0.547587	0.431843	0.0205694	0.000346983
LCM-29		56.228	27.095	0.308389	8.907	0.021	6.346	0.344	99.2494		0.552088	0.42822	0.0196916	0.000369055
LCM-29		58.745	25.835	0.204488	6.806	0.067	7.472	0.54	99.6695		0.64478	0.324559	0.0306608	0.00116699
LCM-29		59.125	25.326	0.173538	6.918	0.062	7.362	0.508	99.4745		0.639102	0.331881	0.029017	0.00108647
LCM-31	10a	60.767	25.2	0.268945	6.084	0.079	7.662	0.548	100.609		0.673007	0.295321	0.0316718	0.0014003
LCM-31	10b	60.527	25.989	0.376746	6.783	0.052	7.254	0.48	101.462		0.640911	0.331184	0.0279046	0.000927564
LCM-31	11a	59.525	25.945	0.202265	7.133	0.049	7.255	0.453	100.562		0.631149	0.342921	0.0259303	0.000860676
LCM-31	11b	58.66	26.653	0.215601	7.655	0	6.9	0.419	100.503		0.604944	0.370885	0.024171	0
LCM-31	1a	58.209	26.678	0.308954	7.847	0.041	6.63	0.431	100.145		0.589333	0.385459	0.025208	0.000735927
LCM-31	1b	58.537	26.746	0.214489	7.948	0.088	6.667	0.456	100.656		0.586921	0.386665	0.0264137	0.00156306
LCM-31	2a	60.693	25.465	0.2645	6.292	0.038	7.661	0.513	100.926		0.667588	0.302998	0.0294141	0.000668713
LCM-31	2b	60.688	25.418	0.228937	6.176	0.052	7.709	0.543	100.815		0.671558	0.297317	0.0311243	0.000914566
LCM-31	3a	60.162	25.851	0.178926	6.785	0.074	7.251	0.454	100.756		0.641723	0.331839	0.0264375	0.00132169
LCM-31	3b	59.545	25.505	0.228937	6.799	0.066	7.303	0.44	99.8869		0.643448	0.331043	0.0255082	0.00117373
LCM-31	feld4a	65.022	19.349	0.0400084	0.01	0.127	1.192	15.069	100.809		0.107265	0.000497289	0.892238	0.00230413
LCM-31		57.848	25.554	0.408975	7.747	0.206	7.167	0.679	99.61		0.602526	0.359915	0.0375597	0.00348748
LCM-31		58.558	25.907	0.364762	7.519	0.144	7.113	0.66	100.266		0.607823	0.355068	0.0371093	0.00248046
LCM-31		61.46	23.481	0.321653	4.671	0.213	8.604	0.991	99.7417		0.726852	0.218063	0.055085	0.00362303
LCM-31		59.879	25.372	0.282967	6.749	0.06	7.459	0.75	100.552		0.638497	0.31926	0.0422429	0.00103682
LCM-31		59.717	25.325	0.330496	6.751	0.048	7.703	0.775	100.649		0.644943	0.312361	0.0426951	0.000811473
LCM-31		66.329	19.193	0.426661	0.188	0	7.492	6.498	100.127		0.631093	0.00875147	0.360155	0
LCM-31		66.547	19.138	0.469769	0.157	0.048	6.998	6.832	100.19		0.604312	0.0074923	0.388195	0.000836929
LCM-31		61.481	24.062	0.39129	5.268	0.074	8.016	0.798	100.09		0.699948	0.254203	0.0458486	0.00130406
LCM-31		61.282	24.072	0.37471	4.963	0.207	8.503	0.973	100.375		0.715387	0.230749	0.0538637	0.00350701
LCM-31		61.691	22.855	0.282967	4.166	0.172	8.861	1.114	99.142		0.744859	0.193525	0.0616157	0.00291324
LCM-31		61.081	23.172	0.318337	4.532	0.181	8.702	1.059	99.0453		0.731059	0.210402	0.0585388	0.00306339
LCM-31		61.117	23.501	0.361446	5.049	0.099	8.396	0.89	99.4134		0.713231	0.237023	0.0497465	0.0016966
LCM-32	1a	63.201	20.471	0.13225	0.594	2.722	3.948	9.773	100.841		0.36874	0.030659	0.600601	0.0488649
LCM-32	1b	63.294	20.197	0.124471	0.615	2.908	3.892	9.704	100.734		0.366584	0.0320113	0.601404	0.0524472
LCM-32	4b	63.981	20.166	0.157811	0.653	1.308	4.273	9.936	100.475		0.382488	0.0323018	0.58521	0.0231132
LCM-32	5b	57.727	27.085	0.397861	8.169	0.332	6.194	0.791	100.696		0.551616	0.402033	0.0463507	0.00593937
LCM-32	5c	58.402	27.056	0.402307	7.854	0.249	6.219	0.794	100.976		0.561194	0.391662	0.0471441	0.0045201
LCM-32	10a	64.458	20.139	0.14892	0.543	1.34	4.199	9.886	100.714		0.381592	0.0272697	0.591138	0.0240173
LCM-32	10b	64.247	20.101	0.1567	0.594	1.369	4.146	9.704	100.318		0.381792	0.0302281	0.58798	0.0248427
LCM-32	10c	64.257	19.771	0.13225	0.58	1.326	4.053	9.832	99.9512		0.373796	0.0295606	0.596643	0.024117
LCM-32	1c	62.658	20.173	0.176704	0.598	2.713	4.034	9.504	99.8567		0.379923	0.0311235	0.588953	0.0490985
LCM-32	2a	59.897	25.313	0.366744	6.371	0.099	7.411	0.579	100.037		0.655103	0.31122	0.0336764	0.00176532
LCM-32	2b	60.692	25.424	0.326735	6.279	0.077	7.279	0.585	100.663		0.653773	0.311655	0.0345721	0.00139561
LCM-32	3a	58.355	25.932	0.315622	7.141	0.052	6.957	0.591	99.3436		0.616092	0.34947	0.0344371	0.000929708
LCM-32	3b	59.454	26.204	0.306731	7.003	0.128	6.966	0.599	100.661		0.620295	0.344609	0.0350959	0.002298
LCM-32	4a	64.038	20.212	0.0911302	0.672	1.49	4.234	9.677	100.414		0.385868	0.0338442	0.580288	0.026708
LCM-32	4c	63.857	20.264	0.113357	0.723	1.401	4.241	9.553	100.152		0.388148	0.0365674	0.575285	0.0252569
LCM-32	5a	58.02	26.781	0.365632	7.721	0.325	6.242	0.831	100.286		0.564602	0.38594	0.0494578	0.00590545
LCM-32	6a	66.41	19.352	0.0889076	0.237	0.131	4.117	10.506	100.842		0.368882	0.011735	0.619383	0.00236632
LCM-32	6b	65.061	19.044	0.123359	0.211	0.079	4.044	10.716	99.2784		0.360699	0.0104003	0.6289	0.00142189
LCM-32	7a	62.448	23.86	0.257832	4.776	0.085	7.428	1.748	100.603		0.662181	0.235286	0.102532	0.00152891
LCM-32	7b	61.024	23.923	0.243384	4.94	0.114	7.411	1.737	99.3924		0.656778	0.241934	0.101288	0.00203744
LCM-32	8a	63.892	19.928	0.116691	0.643	1.08	4.214	9.643	99.5167		0.3861	0.032557	0.581343	0.0196044
LCM-32	8b	63.412	19.71	0.153366	0.677	1.072	4.456	9.83	99.3104		0.394403	0.0331139	0.572483	0.0188133
LCM-32	9a	64.11	20.268	0.108912	0.671	2.039	4.121	9.521	100.839		0.383118	0.0344731	0.582408	0.0368931
LCM-32	9b	63.804	20.243	0.118914	0.679	2.104	4.111	9.33	100.39		0.38691	0.035315	0.577775	0.0384762
LCM-32	9c	64.184	20.493	0.138918	0.737	1.999	4.147	9.712	101.411		0.378908	0.037213	0.583879	0.0355955
LCM-34		59.881	24.512	0.312288	5.913	0.107	7.703	0.738	99.1663		0.672385	0.285229	0.0423866	0.00188385
LCM-34		60.467	24.667	0.290061	5.925	0.132	7.571	0.716	99.7681		0.669029	0.28934	0.0416313	0.00235162
LCM-34		59.602	24.622	0.334515	6.077	0.11	7.597	0.726	99.0685		0.664481	0.293736	0.0417823	0.0019405
LCM-34		61.02	23.829	0.462319	5.144	0.199	7.89	0.834	99.3783		0.699379	0.251979	0.0486425	0.00355195
LCM-34		60.737	24.476	0.312288	5.939	0.125	7.246	0.739	99.5743		0.657874	0.297979	0.0441472	0.00228814
LCM-34		60.952	25.32	0.392305	5.97	0.099	7.346	0.744	100.823		0.65974	0.296295	0.0439653	0.0017935
LCM-34		60.132	24.504	0.502328	5.863	0.16	7.544	0.731	99.4363		0.669685	0.287618	0.0426973	0.00286199
LCM-34		59.984	24.623	0.387859	6.077	0.139	7.746	0.704	99.6609		0.669635	0.29032	0.040045	0.0024224
LCM-34		61.869	24.169	0.316733	5.038	0.143	7.947	0.891	100.374		0.702195	0.246003	0.051802	0.00254687
LCM-34		61.632	24.646	0.475655	5.652	0.165	7.649	0.759	100.979		0.678595	0.277099	0.044306	0.00294938
LCM-34		60.869	23.964	0.378968	5.334	0.121	8.04	0.844	99.551		0.696525	0.255365	0.0481103	0.00211383
LCM-34		59.31	24.668	0.365632	6.121	0.122	7.819	0.722	99.1276		0.669627	0.289689	0.0406849	0.00210692
LCM-35	11a	63.733	23.655	0.174481	3.975	0.118	8.364	1.108	101.127		0.740851	0.194573	0.0645761	0.00210769
LCM-35	1a	60.494	25.597	0.357853	6.235	0.205	7.126	0.793	100.808		0.642365	0.310599	0.0470353	0.00372045
LCM-35	2b	64.32	22.485	0.302286	2.956	0.133	8.985	1.362	100.543		0.780305	0.141866	0.0778284	0.00232868
LCM-35	5a	66.853	19.382	0.32229	0.183	0.143	5.081	9.159	101.123		0.453313	0.00902251	0.537665	0.00257152
LCM-35	5b	66.535	19.206	0.353408	0.164	0.064	5.126	9.171	100.619		0.455604	0.00805528	0.53634	0.00114819
LCM-35	6a	61.644	24.259	0.275613	4.934	0.139	8.119	0.827	100.198		0.712832	0.239393	0.0477754	0.0024601
LCM-35	8b	62.422	24.026	0.416754	4.54	0.352	7.76	1.285	100.802		0.698193	0.225734	0.0760732	0.0063593
LCM-35	9a	59.713	26.077	0.41342	7.003	0.075	6.771	0.777	100.829		0.607142	0.347015	0.045843	0.00135716
LCM-35	9b	58.154	26.492	0.395639	7.629	0.135	6.628	0.71	100.144		0.585972	0.372726	0.0413017	0.00240606
LCM-35	10a	64.059	22.399	0.344517	2.601	0.695	8.205	2.29	100.594		0.735931	0.128922	0.135148	0.0124403
LCM-35	10b	64.085	22.737	0.45454	3.16	0.307	8.248	1.618	100.61		0.745825	0.157907	0.0962679	0.00557854
LCM-35	10c	64.628	21.777	0.330069	2.145	0.526	7.789	3.237	100.432		0.701442	0.106749	0.191808	0.00948161
LCM-35	11b	63.139	23.389	0.280059	3.869	0.05	8.393	1.167	100.287		0.742812	0.189229	0.067959	0.000893443
LCM-35	1b	59.934	26.01	0.377857	7.075	0.091	6.818	0.644	100.95		0.611396	0.350606	0.0379984	0.00164632
LCM-35	1c	60.642	25.988	0.431202	6.606	0.143	6.972	0.7	101.482		0.62906	0.329383	0.0415573	0.00260054
LCM-35	2a	63.662	22.541	0.327847	3.238	0.139	8.839	1.337	100.084		0.768067	0.155489	0.0764438	0.00243487
LCM-35	2c	64.22	22.209	0.348962	2.817	0.17	9.053	1.459	100.277		0.782473	0.134552	0.0829749	0.00296048
LCM-35	3a	65.657	21.551	0.275613	1.822	0.379	7.268	4.233	101.186		0.657136	0.0910366	0.251828	0.00687711
LCM-35	3c	64.588	21.326	0.274502	1.775	0.381	7.458	4.019	99.8215		0.672902	0.0885025	0.238595	0.00689877
LCM-35	6b	61.764	24.016	0.332292	4.788	0.108	8.189	0.868	100.065		0.71795	0.231977	0.0500724	0.00190977
LCM-35	7a	64.479	23.098	0.2645	3.549	0.149	8.221	1.549	101.309		0.733922	0.175089	0.0909895	0.00268083
LCM-35	8a	62.458	24.087	0.353408	4.573	0.433	7.721	1.257	100.882		0.697142	0.228179	0.0746788	0.00783865
LCM-35		63.376	22.199	0.174481	3.303	0.01	9.16	1.534	99.7565		0.763674	0.152177	0.0841497	0.000168447
LCM-35		60.988	23.937	0.278947	4.95	0.134	7.726	1.611	99.6249		0.670573	0.237424	0.0920029	0.00234477
LCM-35		60.853	24.051	0.23116	5.18	0.203	7.705	1.696	99.9192		0.659476	0.24501	0.095514	0.00349884
LCM-35		65.909	18.696	0.440092	0.177	0	6.96	7.155	99.3371		0.591551	0.0083135	0.400136	0
LCM-35		65.384	18.484	0.514552	0.153	0.053	7.042	7.063	98.6936		0.598103	0.00718124	0.394715	0.000908834
LCM-35		66.525	19.266	0.317845	0.235	0.037	7.104	7.004	100.489		0.599879	0.0109662	0.389154	0.000630975
LCM-35		65.796	19.123	0.31451	0.213	0.021	6.933	6.933	99.3335		0.597029	0.0101363	0.392835	0.000365307
LCM-35		63.841	19.891	0.130027	0.729	1.122	4.563	9.669	99.945		0.402811	0.0355636	0.561626	0.0196228
LCM-35		63.352	19.861	0.18226	0.622	1.741	4.241	9.637	99.6363		0.388167	0.0314607	0.580372	0.0311967
LCM-35		64.523	19.709	0.0911302	0.619	0.599	4.541	9.748	99.8301		0.401962	0.0302797	0.567758	0.0106012
LCM-35		64.003	19.5	0.138918	0.618	0.614	4.568	9.815	99.2569		0.401843	0.0300432	0.568114	0.0107971
LCM-35		64.742	19.861	0.152254	0.637	0.565	4.584	9.71	100.251		0.404767	0.0310833	0.56415	0.00998104
LCM-35		63.994	20.092	0.195597	0.666	1.137	4.494	9.834	100.413		0.396553	0.0324766	0.57097	0.0198717
LCM-35		62.979	19.5	0.138918	0.608	1.626	4.237	9.871	98.9599		0.382817	0.0303574	0.586825	0.0288318
LCM-35		65.734	18.855	0.362298	0.235	0.028	6.883	7.001	99.0983		0.592371	0.0111766	0.396452	0.000486728
LCM-35		65.994	19.042	0.435647	0.21	0.022	6.918	7.044	99.6656		0.592859	0.00994529	0.397196	0.000380848
LCM-36	1	61.988	22.901	0.354519	4.163	0.857	7.887	1.089	99.2395		0.723306	0.210981	0.0657132	0.015634
LCM-36	1	61.614	23.483	0.461208	4.823	0.276	7.922	0.996	99.5752		0.704639	0.23707	0.0582915	0.00493645
LCM-36	1	60.588	25.019	0.323401	6.164	0.095	7.341	0.545	100.075		0.660997	0.306714	0.032289	0.0017256
LCM-36	1	60.366	25.746	0.493437	6.562	0.073	7.292	0.534	101.066		0.647047	0.321775	0.0311778	0.00130728
LCM-36	1	61.024	25.575	0.444538	6.57	0.05	6.995	0.539	101.198		0.637046	0.330656	0.0322988	0.000919342
LCM-36	2	60.391	25.871	0.521221	6.981	0.074	6.976	0.494	101.308		0.625152	0.34572	0.0291287	0.0013383
LCM-36	2	59.732	26.144	0.57901	7.255	0.073	6.808	0.46	101.051		0.612234	0.360548	0.0272189	0.00132485
LCM-36	2	58.796	25.835	0.527889	7.481	0.149	6.212	1.026	100.027		0.563638	0.375108	0.0612535	0.00272455
LCM-36	3	63.014	20.997	0.207821	2.731	2.808	9.049	0.441	99.2478		0.834134	0.139118	0.0267478	0.0497065
LCM-36	3	65.054	22.521	0.358964	3.034	0.403	8.283	1.497	101.151		0.756808	0.153194	0.0899983	0.00738596
LCM-36	3	63.897	22.739	0.336737	3.377	0.297	8.697	1.406	100.75		0.757029	0.162443	0.0805273	0.00519709
LCM-36	3	64.008	22.729	0.301174	3.488	0.36	8.468	1.359	100.713		0.750061	0.170734	0.0792045	0.00640254
LCM-36	3	61.477	24.663	0.291172	5.75	0.114	7.617	0.668	100.58		0.678025	0.282851	0.0391248	0.00204645
LCM-36	3	61.15	24.26	0.394527	5.869	0.107	7.505	0.66	99.9455		0.671132	0.290034	0.0388343	0.00192986
LCM-36	4	64.479	22.523	0.4212	2.779	0.584	8.453	1.773	101.012		0.757754	0.137668	0.104578	0.0104685
LCM-36	4	61.258	23.76	0.43787	5.274	0.182	7.592	0.746	99.2499		0.690346	0.26502	0.0446338	0.00333316
LCM-36	4	61.218	25.044	0.41342	5.604	0.363	7.691	0.643	100.976		0.686024	0.276237	0.0377383	0.00650061
LCM-36	4	60.581	24.868	0.282281	5.726	0.396	7.62	0.668	100.141		0.678912	0.281927	0.0391606	0.00707932
LCM-36	5	61.802	25.172	0.385637	5.739	0.187	7.364	0.851	101.501		0.663696	0.285838	0.0504661	0.00339425
LCM-36	5	60.539	25.05	0.394527	5.902	0.203	7.393	0.851	100.333		0.659235	0.290835	0.0499303	0.00364463
LCM-36	5	61.167	24.878	0.426756	5.972	0.171	7.329	0.815	100.759		0.656396	0.295576	0.0480279	0.00308531
LCM-36	5	60.515	24.366	0.480101	6.026	0.138	7.331	0.639	99.4951		0.66155	0.300508	0.0379416	0.00251021
LCM-36	5	60.651	24.94	0.41342	6.343	0.096	7.153	0.655	100.251		0.645039	0.316097	0.0388645	0.00174636
LCM-36	6	62.284	24.107	0.345628	5.06	0.147	7.833	0.782	100.559		0.702902	0.250925	0.046173	0.00265859
LCM-36	6	61.769	24.443	0.408975	5.272	0.173	8.003	0.763	100.832		0.700883	0.25515	0.0439675	0.00305235
LCM-36	6	62.95	24.38	0.30562	5.025	0.207	7.593	0.775	101.236		0.697895	0.255235	0.0468698	0.00383005
LCM-36	6	61.302	23.935	0.382302	5.556	0.143	7.416	0.751	99.4853		0.675379	0.279619	0.045002	0.0026248
LCM-36	6	60.222	24.055	0.464542	6.065	0.171	7.441	0.654	99.0725		0.663015	0.298642	0.0383429	0.00306956
LCM-36	6	60.941	24.624	0.456763	6.157	0.16	7.284	0.648	100.271		0.655457	0.306176	0.0383675	0.00290105
LCM-36	7	62.623	24.073	0.417866	4.818	0.165	8.131	0.834	101.062		0.716875	0.234744	0.0483816	0.00293111
LCM-36	7	62.52	24.321	0.31451	5.084	0.13	7.91	0.801	101.081		0.703325	0.249812	0.0468627	0.00233042
LCM-36	7	62.205	24.13	0.47121	5.287	0.162	7.913	0.737	100.905		0.69905	0.25811	0.04284	0.00288371
LCM-36	8	63.247	23.287	0.422311	4.369	0.169	8.255	0.978	100.727		0.729697	0.21342	0.0568826	0.00300972
LCM-36	8	63.032	23.542	0.358964	4.564	0.228	8.197	0.949	100.871		0.722611	0.222343	0.0550466	0.00404527
LCM-36	8	62.738	23.889	0.45454	4.637	0.195	7.993	0.961	100.868		0.714437	0.229044	0.0565187	0.00350982
LCM-36	8	60.222	25.03	0.382302	6.711	0.077	6.923	0.537	99.8823		0.630224	0.33761	0.0321655	0.00141449
LCM-36	8	59.429	25.35	0.405641	7.007	0.075	6.889	0.524	99.6796		0.620295	0.34866	0.0310448	0.00136281
LCM-36	8	59.838	25.331	0.540113	7.141	0.079	6.703	0.496	100.128		0.610717	0.359548	0.0297349	0.00145241
LCM-36	9	59.358	26.5	0.422311	7.368	0.085	6.935	0.432	101.1		0.614208	0.360617	0.0251749	0.00151898
LCM-36	9	58.97	26.625	0.377857	7.6	0.071	6.643	0.437	100.724		0.596831	0.377336	0.0258335	0.00128739
LCM-36	9	59.254	26.586	0.382303	7.678	0.035	6.704	0.412	101.051		0.597605	0.37823	0.0241653	0.000630083
LCM-36	9	58.338	25.55	0.461208	7.992	0.08	6.48	0.417	99.3182		0.580077	0.395361	0.0245619	0.00144509
LCM-36	10	63.759	23.079	0.270057	3.794	0.001	8.437	1.252	100.592		0.742861	0.184605	0.0725335	1.77924e-05
LCM-36	10	64.173	23.248	0.171147	3.793	0.033	8.274	1.253	100.945		0.73911	0.187242	0.0736477	0.00059535
LCM-36	10	62.927	22.737	0.402307	4.275	0.238	8.07	1.157	99.8063		0.720939	0.211051	0.06801	0.00427822
LCM-36	10	63.201	23.769	0.188929	4.663	0.048	8.183	0.978	101.031		0.717594	0.225974	0.0564313	0.000849888
LCM-36	11	69.242	20.17	0.243384	0.013	0	11.473	0.149	101.29		0.990912	0.000620482	0.00846757	0
LCM-36	11	67.795	19.873	0.508996	0.026	0.01	11.465	0.078	99.756		0.994303	0.00124608	0.00445096	0.000175223
LCM-36	11	68.83	19.846	0.687922	0.026	0	11.321	0.146	100.857		0.990339	0.0012569	0.00840363	0
LCM-36	12	60.539	25.447	0.574565	6.187	0.117	7.39	0.57	100.825		0.660758	0.305707	0.0335342	0.00210955
LCM-36	12	60.456	25.782	0.493437	6.78	0.075	7.143	0.545	101.274		0.635025	0.333095	0.0318802	0.00134558
LCM-36	12	59.486	26.161	0.508996	7.413	0.096	6.958	0.431	101.054		0.613679	0.361309	0.025012	0.00170808
LCM-36		66.491	19.078	0.418977	0.222	0	6.945	7.006	100.161		0.594733	0.0105058	0.394761	0
LCM-36		66.573	19.241	0.405641	0.168	0.052	6.941	7.32	100.701		0.585725	0.00783445	0.406441	0.000885959
LCM-36		67.106	19.3	0.414531	0.168	0	6.753	7.121	100.863		0.585622	0.00805114	0.406327	0
LCM-36		63.474	19.908	0.18226	0.636	1.788	4.344	9.597	99.9293		0.394546	0.0319222	0.573532	0.0317742
LCM-36		63.525	19.587	0.243384	0.639	1.435	4.34	9.81	99.5794		0.38931	0.0316763	0.579014	0.0253529
LCM-36		66.154	19.254	0.331181	0.308	0.052	6.943	6.931	99.9732		0.594756	0.0145804	0.390663	0.000899348
LCM-36		67.324	19.314	0.401195	0.219	0	7.004	6.595	100.857		0.610934	0.0105565	0.37851	0
LCM-36		66.812	19.401	0.388971	0.215	0.034	7.238	6.921	101.01		0.607688	0.00997535	0.382336	0.00057652
LCM-36		67.043	19.491	0.371189	0.239	0	7.126	6.76	101.03		0.608745	0.0112828	0.379972	0
LCM-36		66.951	19.485	0.435647	0.214	0.035	7.048	7.119	101.288		0.594746	0.00997945	0.395275	0.000596483
LCM-36		67.347	19.677	0.418977	0.221	0.067	6.855	6.909	101.495		0.59489	0.0105986	0.394511	0.00117359
LCM-36		63.44	20.175	0.195597	0.672	1.828	4.287	9.576	100.174		0.391178	0.0338858	0.574936	0.0326079
LCM-36		63.621	19.822	0.234494	0.615	1.31	4.326	9.719	99.6475		0.391111	0.0307267	0.578162	0.0233742
LCM-37	1	57.552	26.037	0.390082	7.628	0.041	6.931	0.469	99.0481		0.605064	0.367996	0.0269397	0.000722768
LCM-37	2	64.921	19.163	0.0533445	0.238	0.069	4.167	10.679	99.2903		0.367943	0.0116135	0.620444	0.00122969
LCM-37	2	64.979	19.229	0.0577899	0.241	0.078	4.078	10.692	99.3548		0.362607	0.0118422	0.625551	0.00139958
LCM-37	2	65.417	19.07	0.0444538	0.254	0.056	4.102	10.745	99.6885		0.362611	0.0124081	0.624981	0.000999362
LCM-37	3	61.811	23.691	0.242273	4.447	0.087	7.63	2.1	100.008		0.665256	0.214269	0.120475	0.00153053
LCM-37	3	61.758	23.456	0.143363	4.538	0.116	7.422	2.009	99.4424		0.659635	0.222882	0.117484	0.00207903
LCM-37	3	61.64	24.273	0.444	5.111	0.229	7.579	0.892	100.168		0.689604	0.256993	0.0534032	0.00419297
LCM-37	4	62.958	23.116	0.188929	3.776	0.009	8.691	1.182	99.9209		0.752114	0.180582	0.0673048	0.000157366
LCM-37	4	63.091	23.525	0.287838	3.86	0	8.65	1.15	100.564		0.74958	0.184849	0.0655714	0
LCM-37	4	62.305	24.143	0.220046	3.876	0	8.552	1.035	100.131		0.751826	0.188305	0.0598694	0
LCM-37	5	60.845	23.975	0.472	5.583	0.159	7.292	0.797	99.123		0.668887	0.28301	0.0481037	0.00293865
LCM-37	5	59.532	25.327	0.327847	6.356	0.24	6.919	1.215	99.9168		0.616068	0.312749	0.071183	0.0042998
LCM-37	5	59.298	25.118	0.300063	6.447	0.251	7.014	1.226	99.6541		0.616158	0.312977	0.070865	0.00443601
LCM-37	5	59.054	25.203	0.295618	6.488	0.224	6.88	1.243	99.3876		0.609752	0.317763	0.0724854	0.00399574
LCM-37	6	59.099	26.01	0.403418	7.123	0.051	7.116	0.493	100.295		0.625489	0.345998	0.0285131	0.000905074
LCM-37	6	59.197	26.138	0.36341	7.252	0.067	7.085	0.492	100.594		0.620602	0.351042	0.0283565	0.00118456
LCM-37	6	58.947	26.177	0.31451	7.369	0.067	6.921	0.479	100.275		0.612021	0.360109	0.0278707	0.00119585
LCM-37	7	68.031	19.806	0.342294	0.062	0.03	11.444	0.23	99.9453		0.984041	0.00294615	0.013013	0.000521019
LCM-37	7	67.944	19.663	0.30562	0.562	0.053	10.318	1.752	100.598		0.87579	0.0263614	0.0978483	0.000908258
LCM-37	7	67.139	19.457	0.296729	1.382	0.048	10.788	0.492	99.6027		0.908429	0.064311	0.0272602	0.000816131
LCM-37	7	61.078	23.631	0.378	4.962	0.245	7.971	0.926	99.191		0.704003	0.242184	0.053813	0.00435368
LCM-37	8	60.552	24.078	0.374	5.835	0.212	7.356	0.777	99.184		0.663193	0.290714	0.0460929	0.00384754
LCM-37	8	60.371	24.735	0.378	6.103	0.134	7.371	0.672	99.764		0.65896	0.301511	0.0395291	0.00241496
LCM-37	8	57.384	27.19	0.323401	8.472	0.016	6.181	0.509	100.075		0.551987	0.418104	0.0299091	0.000288661
LCM-37	8	56.862	27.047	0.220046	8.556	0.012	6.219	0.527	99.443		0.550647	0.41865	0.0307028	0.000214667
LCM-37	8	57.472	27.352	0.268945	8.546	0.022	6.145	0.498	100.304		0.548887	0.421844	0.0292688	0.000396949
LCM-37	9	64.374	22.453	0.193374	3.303	0	8.491	1.553	100.367		0.748887	0.160988	0.0901247	0
LCM-37	9	64.165	22.611	0.251164	3.378	0.016	8.588	1.611	100.62		0.745825	0.162118	0.0920566	0.000280716
LCM-37	9	63.768	22.47	0.278947	3.309	0	8.36	1.632	99.8179		0.74229	0.162365	0.0953459	0
LCM-37	10	60.872	24.1	0.452	5.461	0.136	7.645	0.847	99.513		0.681362	0.268968	0.0496705	0.00244343
LCM-37	10	60.418	25.346	0.282281	6.536	0.084	7.02	0.87	100.556		0.626541	0.322368	0.0510912	0.00151272
LCM-37	10	59.729	25.617	0.381191	6.735	0.09	6.966	0.81	100.328		0.620807	0.331695	0.0474978	0.00161821
LCM-37	10	59.125	26.107	0.358964	7.349	0.072	6.707	0.696	100.415		0.597443	0.361763	0.0407936	0.00129438
LCM-37	11	67.436	20.193	0.0944643	0.205	0.004	11.232	0.215	99.3795		0.977822	0.00986243	0.0123156	7.03648e-05
LCM-37	11	67.897	20.4	0.140029	0.211	0.002	11.208	0.275	100.133		0.974139	0.0101345	0.0157268	3.51262e-05
LCM-37	11	67.875	20.238	0.0855735	0.236	0.046	11.354	0.2	100.035		0.977444	0.0112275	0.0113289	0.000799607
LCM-37	12	60.029	25.675	0.20671	6.615	0.038	7.072	0.659	100.295		0.633624	0.327527	0.0388498	0.000687539
LCM-37	12	59.223	26.207	0.125582	7.123	0.031	7.086	0.584	100.38		0.62122	0.345092	0.0336877	0.000548897
LCM-37	12	59.244	26.14	0.188929	7.093	0.019	6.992	0.629	100.306		0.617362	0.346095	0.0365429	0.000338897
LCM-37	13	61.637	23.824	0.488992	4.886	0.106	8.132	0.88	99.954		0.712637	0.23662	0.0507421	0.00187364
LCM-37	13	61.228	23.994	0.404529	5.074	0.193	8.072	0.842	99.8075		0.70621	0.245319	0.0484707	0.00340059
LCM-37	13	61.15	23.975	0.367855	5.199	0.169	7.919	0.829	99.6089		0.698476	0.253413	0.0481116	0.0030032
LCM-37	14	58.595	25.844	0.31451	7.226	0.089	6.883	0.512	99.4635		0.613834	0.356122	0.030044	0.00160137
LCM-37	14	58.389	26.145	0.475655	7.465	0.08	6.806	0.473	99.8337		0.605379	0.366938	0.0276829	0.0014359
LCM-37	14	58.599	25.914	0.448983	7.443	0.056	6.78	0.473	99.714		0.60512	0.367103	0.0277772	0.00100899
LCM-37	15	63.632	22.542	0.00889076	3.457	0.01	8.504	1.494	99.6479		0.746133	0.167618	0.0862498	0.000177272
LCM-37	15	63.678	22.837	0.228937	3.877	0.028	8.483	1.376	100.508		0.735676	0.185806	0.0785181	0.000490462
LCM-37	15	63.388	23.097	0.134473	3.905	0.01	8.359	1.279	100.172		0.735922	0.189988	0.0740905	0.000177879
LCM-37	fel10	60.299	24.153	0.334	5.603	0.195	7.738	0.813	99.135		0.680606	0.272342	0.0470514	0.003454
LCM-38	1	62.545	23.245	0.3723	4.169	0.259	8.415	1.068	100.073		0.736762	0.201712	0.061526	0.00456153
LCM-38	1	62.852	23.398	0.404529	4.318	0.251	8.252	1.065	100.541		0.727756	0.210444	0.0618003	0.00445333
LCM-38	1	62.574	23.68	0.400084	4.479	0.249	8.275	0.927	100.584		0.728424	0.217884	0.0536921	0.00440981
LCM-38	2	64.522	18.942	0.0133361	0	0.104	0.791	15.992	100.364		0.0699167	0	0.930083	0.00185419
LCM-38	2	65.143	18.999	0.166702	0	0.109	2.038	14.355	100.811		0.177474	0	0.822526	0.00191447
LCM-38	2	64.496	19.016	0.0622353	0.002	0.078	1.522	14.913	100.089		0.134267	9.75018e-05	0.865635	0.00138858
LCM-38	3	59.726	24.576	0.444538	5.827	0.152	7.535	0.807	99.0675		0.667634	0.285317	0.0470483	0.0027142
LCM-38	3	60.158	25.146	0.417866	6.281	0.143	7.481	0.571	100.198		0.660415	0.306418	0.0331672	0.00254455
LCM-38	3	60.391	25.029	0.435647	6.284	0.126	7.478	0.562	100.306		0.660574	0.306761	0.0326653	0.00224416
LCM-38	4	68.998	19.862	0.0400084	0.054	0.015	11.565	0.056	100.59		0.994267	0.00256554	0.00316782	0.000260531
LCM-38	4	68.616	20.107	0.0455651	0.089	0.028	11.53	0.1	100.516		0.990126	0.00422356	0.00565036	0.000485659
LCM-38	4	68.644	19.924	0	0.14	0.023	11.461	0.095	100.287		0.987943	0.00666906	0.00538825	0.000400485
LCM-38	4	68.24	20.045	0.0455651	0.232	0.023	11.645	0.181	100.412		0.979205	0.0107808	0.0100145	0.000390675
LCM-38	5	68.045	19.924	0.00889076	0.067	0	11.604	0.061	99.7099		0.993394	0.00316969	0.00343604	0
LCM-38	6	62.962	18.803	0	0.003	1.08	0.646	15.814	99.308		0.0584457	0.000149992	0.941404	0.0193631
LCM-38	6	63.818	19.103	0.0133361	0.04	0.874	2.042	13.581	99.4713		0.185633	0.0020095	0.812357	0.0158022
LCM-38	7	63.724	19.233	0	0	1.042	1.059	15.022	100.08		0.0967722	0	0.903228	0.0188786
LCM-38	7	66.485	19.418	0.580122	0.434	0.104	8.819	3.423	99.2631		0.779676	0.0212037	0.199121	0.00185458
LCM-38	7	66.431	19.951	0.952422	0.637	0.106	8.428	3.14	99.6454		0.777054	0.0324559	0.19049	0.00197106
LCM-38	7	65.591	20.988	0.507884	1.7	0.324	8.912	2.349	100.372		0.781956	0.0824297	0.135614	0.005712
LCM-38	8	65.864	19.609	0.458985	0.769	0.176	7.467	5	99.344		0.667777	0.0380049	0.294218	0.0031706
LCM-38	8	65.956	19.613	0.368966	0.793	0.193	7.297	5.141	99.362		0.656328	0.0394164	0.304256	0.00349572
LCM-38	8	66.372	19.893	0.56234	0.836	0.151	8.536	3.526	99.8763		0.754194	0.040819	0.204987	0.00268881
LCM-38	9	68.549	20.015	0	0.09	0.05	11.615	0.148	100.467		0.987492	0.00422848	0.00827925	0.000858292
LCM-38	9	68.402	19.866	0.0500105	0.101	0.041	11.692	0.079	100.231		0.990865	0.00473015	0.00440522	0.000701662
LCM-38	9	68.012	19.873	0.00889076	0.33	0.059	11.465	0.141	99.8889		0.976564	0.0155335	0.00790243	0.00101452
LCM-38	10	68.655	20.076	0.0544559	0.063	0	11.679	0.081	100.608		0.992512	0.00295868	0.00452929	0
LCM-38	10	67.555	19.862	0	0.08	0.046	9.01	4.071	100.624		0.767929	0.00376802	0.228303	0.000791651
LCM-39	9	69.103	19.273	0.268945	0.131	0.024	10.992	0.667	100.459		0.955555	0.00629329	0.0381522	0.000421435
LCM-39	9	65.573	21.372	0.385637	2.839	0.131	9.064	1.585	100.95		0.776307	0.134371	0.0893218	0.00226217
LCM-39	10	65.702	20.25	0.277836	1.784	0.622	8.27	3.473	100.379		0.716572	0.0854234	0.198004	0.0107737
LCM-39	10	65.654	20.452	0.205599	2.032	0.832	8.157	3.355	100.688		0.710079	0.0977524	0.192169	0.0144249
LCM-39	11	62.091	23.276	0.371189	5.234	0.124	7.794	1	99.8902		0.687035	0.254964	0.0580007	0.00220397
LCM-39	11	61.645	23.98	0.412309	5.866	0.155	7.796	0.872	100.726		0.671407	0.27918	0.0494135	0.00269029
LCM-39	11	61.183	23.793	0.443426	5.815	0.073	7.552	0.874	99.7334		0.665928	0.283363	0.0507097	0.00129911
LCM-39		63.538	19.242	0.0255609	0.114	2.191	2.362	12.402	99.8746		0.22314	0.00595154	0.770909	0.0401483
LCM-39		64.581	19.371	0	0.119	2.356	2.324	12.4	101.151		0.22031	0.0062341	0.773455	0.0431843
LCM-39		67.629	19.146	0.33896	0.238	0.081	6.919	6.586	100.938		0.607783	0.0115534	0.380664	0.00143579
LCM-39		64.721	19.357	0.178926	0.515	0.551	4.269	10.223	99.8149		0.378452	0.0252301	0.596318	0.00977449
LCM-39		65.56	19.5	0.11558	0.527	0.142	4.369	10.143	100.357		0.385472	0.025695	0.588833	0.00252537
LCM-39		65.721	19.579	0.1567	0.524	0.171	4.358	9.966	100.476		0.388932	0.0258432	0.585224	0.00307446
LCM-39		65.659	19.189	0.1078	0.539	0.187	4.397	10.192	100.271		0.385667	0.026126	0.588207	0.00330357
LCM-39		65.747	19.159	0.126693	0.545	0.173	4.417	10.23	100.398		0.385786	0.0263053	0.587908	0.00304414
LCM-39		64.562	19.572	0.200042	0.537	1.181	4.104	10.056	100.212		0.372501	0.0269353	0.600564	0.0212024
LCM-39		64.276	19.444	0.185595	0.59	1.034	4.193	9.946	99.6686		0.378999	0.0294709	0.59153	0.0185367
LCM-39		65.787	20.779	0.44676	1.52	0.951	8.736	2.861	101.081		0.762405	0.0733068	0.164288	0.0164951
LCM-39		65.43	20.578	0.286727	1.568	0.754	8.614	2.905	100.136		0.756148	0.0760634	0.167789	0.0131986
LCM-39		65.448	20.509	0.38008	1.572	0.775	8.631	2.88	100.195		0.757457	0.0762389	0.166304	0.0135579
LCM-39		66.319	20.813	0.4212	1.562	0.665	8.726	2.625	101.131		0.771093	0.0762782	0.152629	0.0117357
LCM-39		65.403	20.805	0.350074	1.597	0.815	8.533	2.892	100.395		0.753904	0.0779734	0.168123	0.0143424
LCM-39		66.093	20.952	0.253387	1.612	0.739	8.677	2.772	101.098		0.761691	0.0781991	0.16011	0.0129396
LCM-39		65.654	20.985	0.38008	1.659	0.849	8.622	2.806	100.955		0.757306	0.0805262	0.162168	0.0148456
LCM-39		65.774	20.96	0.237828	1.787	0.866	8.524	2.675	100.824		0.756234	0.0876123	0.156153	0.0152884
LCM-39		64.874	20.97	0.323401	1.83	0.913	8.642	2.641	100.193		0.758667	0.0887801	0.152553	0.0159387
LCM-39		64.133	20.772	0.394527	1.867	0.835	8.816	2.635	99.4525		0.761212	0.0890853	0.149703	0.0143603
LCM-39		64.024	21.316	0.278947	2.277	0.748	8.657	2.329	99.6299		0.756218	0.109918	0.133864	0.0130319
LCM-39		65.095	21.72	0.327847	2.477	0.525	8.859	1.806	100.81		0.776005	0.119904	0.104091	0.00920758
LCM-39		64.898	21.577	0.22338	2.771	0.005	9.284	1.383	100.141		0.791792	0.130599	0.0776091	8.61652e-05
LCM-39		62.701	23.344	0.11558	4.571	0.154	8.711	0.725	100.322		0.743636	0.215641	0.0407235	0.00264962
LCM-39		61.145	23.897	0.428979	5.436	0.145	8.005	0.732	99.789		0.696651	0.261433	0.041916	0.00254354
LCM-39		60.6	23.912	0.410086	5.751	0.119	7.87	0.648	99.3101		0.685869	0.276973	0.0371583	0.00209135
LCM-39		60.603	24.446	0.3723	5.892	0.159	7.826	0.645	99.9433		0.680141	0.282976	0.0368836	0.00278464
LCM-39		60.774	24.536	0.291172	6.077	0.121	7.632	0.836	100.267		0.661332	0.291003	0.0476652	0.00211432
LCM-39		60.197	24.746	0.324513	6.172	0.153	7.651	0.807	100.051		0.65998	0.294216	0.0458037	0.00265993
LCM-39		60.011	24.812	0.335626	6.483	0.139	7.333	0.698	99.8116		0.644664	0.31496	0.0403759	0.00246331
LCM-39		59.312	25.036	0.44676	6.653	0.135	7.438	0.697	99.7178		0.642692	0.317681	0.0396272	0.0023517
LCM-39		60.996	25.596	0.123359	6.58	0.039	7.231	0.654	101.219		0.640049	0.321861	0.0380897	0.000697108
LCM-39		59.621	25.147	0.33896	6.831	0.113	7.173	0.649	99.873		0.630594	0.331865	0.0375412	0.00200346
LCM-39		59.746	25.36	0.376746	6.947	0.043	7.254	0.678	100.405		0.628641	0.332698	0.0386607	0.000752472
LCM-39		59.566	25.357	0.302286	6.99	0.1	7.099	0.656	100.07		0.623077	0.339039	0.0378846	0.00177051
LCM-39		59.367	25.336	0.402307	7.016	0.1	7.081	0.663	99.9653		0.621444	0.340271	0.0382856	0.00177036
LCM-39		59.675	25.661	0.327847	7.056	0.109	7.081	0.661	100.571		0.620312	0.341587	0.0381006	0.00192588
LCM-39		58.607	25.666	0.462319	7.342	0.116	6.928	0.877	99.9983		0.599184	0.350909	0.0499076	0.00202327
LCM-40	3a	60.545	24.166	0.520109	5.592	0.233	7.774	0.945	99.7751		0.676821	0.269044	0.0541347	0.00408255
LCM-40	3b	61.376	23.917	0.524555	5.226	0.236	7.746	1.022	100.048		0.685095	0.255429	0.0594756	0.00420031
LCM-40	3c	60.755	24.332	0.412309	5.619	0.227	7.67	0.894	99.9093		0.674973	0.273261	0.0517658	0.0040206
LCM-40	4a	61.325	24.127	0.376746	5.473	0.21	7.61	0.985	100.107		0.674489	0.268067	0.0574436	0.00374716
LCM-40	4b	60.895	23.846	0.564563	5.303	0.222	7.8	0.97	99.6006		0.686089	0.257771	0.0561399	0.00393054
LCM-40	4c	61.185	24.111	0.425645	5.439	0.207	7.594	0.956	99.9176		0.6763	0.26768	0.0560198	0.00371149
LCM-40	6a	60.1	24.584	0.48788	5.918	0.23	7.421	0.859	99.5999		0.659257	0.290532	0.0502111	0.00411201
LCM-40	6b	60.276	24.236	0.461208	5.618	0.176	7.705	0.941	99.4132		0.674175	0.27165	0.0541756	0.00310232
LCM-40	6c	60.573	24.35	0.344517	5.719	0.223	7.552	0.91	99.6715		0.667657	0.279408	0.0529355	0.00396819
LCM-40	7a	60.861	24.364	0.443426	5.496	0.165	7.771	0.945	100.045		0.679877	0.265722	0.0544002	0.00290868
LCM-40	7b	60.686	24.3	0.520109	5.61	0.164	7.625	0.914	99.8191		0.673194	0.27371	0.0530959	0.00291742
LCM-40	7c	60.638	24.868	0.456763	5.893	0.179	7.475	0.839	100.349		0.662463	0.288612	0.0489246	0.00319549
LCM-40	8a	69.239	18.992	0.246718	0.138	0.052	10.918	0.377	99.9627		0.971152	0.00678345	0.0220648	0.000933824
LCM-40	8c	66.486	20.371	0.610128	0.202	0	11.283	0.184	99.1361		0.979793	0.00969368	0.0105134	0
LCM-40	9b	61.769	24.287	0.452317	5.548	0.21	7.692	0.972	100.93		0.674885	0.269001	0.056114	0.00370953
LCM-40	9c	61.141	24.184	0.447872	5.407	0.213	7.711	0.999	100.103		0.679003	0.263115	0.0578817	0.00377591
LCM-9		60.064	24.241	0.669029	5.659	0.086	7.362	0.856	98.937		0.666093	0.282948	0.0509597	0.00156992
LCM-9		60.429	24.748	0.524555	6.251	0.143	7.167	0.783	100.046		0.643552	0.310187	0.0462618	0.00258809
LCM-9		57.234	26.307	0.4212	8.106	0.046	6.64	0.455	99.2092		0.581491	0.392291	0.0262181	0.000813397
LCM-9		57.131	26.716	0.381191	8.346	0.044	6.442	0.398	99.4582		0.56928	0.407578	0.0231421	0.000785127
LCM-9		57.358	26.741	0.308954	8.374	0.037	6.278	0.669	99.766		0.553331	0.407872	0.0387975	0.000658571
LCM-9		57.174	26.299	0.3723	8.446	0.088	6.319	0.653	99.3513		0.553516	0.408847	0.0376366	0.00155529
LCM-9		57.174	26.905	0.340071	8.373	0.046	6.386	0.426	99.6501		0.565463	0.409717	0.0248199	0.000822431
LCM-9		56.499	26.624	0.390082	8.505	0.03	6.391	0.418	98.8571		0.562287	0.413515	0.024198	0.000533092
LCM-9		57.996	26.854	0.345628	8.43	0.022	6.333	0.397	100.378		0.562792	0.413994	0.0232137	0.000394924
LCM-9		56.596	26.724	0.448983	8.581	0.017	6.261	0.387	99.015		0.556154	0.421227	0.0226192	0.000305064
LCM-9		56.349	26.579	0.2645	8.841	0.083	6.299	0.383	98.7985		0.550769	0.427196	0.0220349	0.00146441
LCM-9		56.065	27.787	0.431202	9.42	0.017	5.583	0.318	99.6212		0.507641	0.473334	0.0190253	0.000312267
LCM-9		54.466	27.944	0.801279	10.136	0.081	5.105	0.769	99.3023		0.455301	0.499571	0.0451278	0.00145773
LCM-9		54.49	27.896	0.617908	10.13	0.021	4.984	0.767	98.9059		0.449547	0.504933	0.0455205	0.000382625
LCM-9		51.999	30.074	1.01688	12.505	0	3.758	0.377	99.7299		0.344247	0.63303	0.0227232	0
LCM-9		50.521	30.367	0.927973	13.384	0.019	3.53	0.317	99.066		0.317022	0.664245	0.0187322	0.000344701
DQW-21		67.583	19.062	0.368966	0.178	0.011	6.506	7.232	100.941		0.572565	0.00865682	0.418778	0.000195588
DQW-21		67.186	19.133	0.302286	0.192	0.059	6.448	7.132	100.452		0.573317	0.00943405	0.417249	0.00105897
DQW-21		66.854	18.867	0.313399	0.198	0.046	6.559	7.118	99.9554		0.577787	0.00963879	0.412575	0.000818193
DQW-21		67.681	19.519	0.242273	0.201	0.024	6.667	7.093	101.427		0.582517	0.00970515	0.407777	0.000423574
DQW-21		66.931	18.956	0.250053	0.208	0.065	6.794	7.12	100.324		0.586004	0.00991438	0.404082	0.00113167
DQW-21		67.072	19.044	0.354519	0.206	0.053	6.788	6.952	100.47		0.591488	0.00991971	0.398592	0.000932392
DQW-21		67.46	19.171	0.354519	0.217	0.062	6.796	6.842	100.903		0.595209	0.0105028	0.394288	0.00109611
DQW-21		67.704	19.033	0.280059	0.219	0.021	7.015	6.499	100.771		0.61469	0.0106047	0.374705	0.000371715
DQW-21		67.24	18.92	0.457874	0.223	0.04	6.757	6.993	100.631		0.588511	0.0107333	0.400755	0.000703524
DQW-21		67.641	19.042	0.286727	0.232	0.023	6.782	6.787	100.794		0.596171	0.0112701	0.392559	0.000408401
DQW-21		67.209	18.835	0.283393	0.234	0.05	6.654	6.95	100.215		0.585931	0.0113869	0.402683	0.000888936
DQW-21		67.275	19.044	0.250053	0.237	0.028	6.743	6.904	100.481		0.590627	0.0114719	0.397901	0.000495366
DQW-21		67.406	19.299	0.22338	0.237	0.014	6.831	6.745	100.755		0.599207	0.0114886	0.389304	0.000248105
DQW-21		67.095	19.128	0.197819	0.24	0.052	6.67	7.151	100.534		0.579604	0.0115251	0.408871	0.000912296
DQW-21		67.079	18.965	0.3723	0.242	0.012	6.015	8.12	100.805		0.523428	0.0116376	0.464935	0.000210977
DQW-21		67.676	19.149	0.398973	0.242	0.062	6.789	6.76	101.077		0.597061	0.0117613	0.391178	0.00110065
DQW-21		67.032	18.973	0.354519	0.251	0.061	6.821	6.83	100.323		0.595526	0.0121103	0.392363	0.00107508
DQW-21		67.645	19.424	0.275613	0.255	0.009	6.989	6.542	101.14		0.611223	0.012324	0.376453	0.000159031
DQW-21		67.505	19.246	0.238939	0.253	0.03	6.666	6.779	100.718		0.591677	0.0124099	0.395913	0.000537812
DQW-21		67.198	19.074	0.275613	0.267	0.058	6.747	6.687	100.307		0.597371	0.0130639	0.389565	0.00103666
DQW-21		66.565	19.155	0.167813	0.279	0.206	6.065	7.578	100.016		0.541258	0.0137596	0.444982	0.0037013
DQW-21		67.135	19.502	0.376746	0.292	0.115	7.016	6.571	101.008		0.610035	0.0140306	0.375934	0.00201656
DQW-21		66.671	19.486	0.242273	0.318	0.175	7.112	6.502	100.506		0.614909	0.0151941	0.369897	0.00304828
DQW-21		66.997	19.219	0.327847	0.339	0.195	7.022	6.454	100.554		0.612956	0.0163529	0.370691	0.00342796
DQW-21		66.723	19.263	0.308954	0.363	0.144	7.142	6.164	100.108		0.626579	0.0175991	0.355822	0.00254645
DQW-21		65.377	19.787	0.245607	0.583	1.397	5.685	7.578	100.653		0.51713	0.0293066	0.453564	0.0250367
DQW-21		65.902	21.709	0.268945	2.523	0.094	9.081	1.594	101.172		0.788002	0.120987	0.0910115	0.00164562
DQW-21		63.981	22.173	0.216712	3.148	0.292	8.509	1.834	100.154		0.742794	0.151863	0.105343	0.00512466
DQW-21		64.483	22.92	0.250053	3.514	0.217	8.943	0.977	101.304		0.775779	0.168455	0.0557653	0.00378957
DQW-21		64.11	22.895	0.261166	3.931	0.281	8.36	1.404	101.242		0.729738	0.189623	0.0806385	0.00493223
DQW-21		62.693	22.862	0.286727	4.166	0.246	8.517	1.175	99.9457		0.734709	0.198598	0.0666931	0.00427001
DQW-21		61.601	23.922	0.332292	5.153	0.132	7.869	1.045	100.054		0.690006	0.249701	0.0602926	0.00233354
DQW-21		60.924	24.222	0.332292	5.488	0.17	7.881	0.948	99.9653		0.683074	0.262862	0.0540641	0.00296871
DQW-21		60.704	24.765	0.335626	6.03	0.241	7.422	1.004	100.502		0.650202	0.291925	0.0578729	0.00424833
DQW-21		61.316	24.922	0.428979	5.973	0.233	7.307	1.018	101.198		0.64792	0.292686	0.0593943	0.00415769
DQW-21		60.705	24.735	0.447872	6.082	0.234	7.351	1.013	100.568		0.646038	0.295383	0.0585782	0.00413857
DQW-21		60.021	25.119	0.394527	6.566	0.326	7.298	0.899	100.624		0.633615	0.315029	0.0513566	0.00568703
DQW-21		57.677	25.908	0.529	8.078	0.101	6.33	0.812	99.435		0.558775	0.394062	0.0471633	0.00179844
DQW-21		58.69	26.909	0.354519	8.483	0	6.357	0.49	101.284		0.559236	0.412401	0.0283631	0

## Sheet: Biotite
Electron microprobe analyses of biotite from volcanic ash beds in the Morrison Formation (wt%)
Sample	SiO2	TiO2	Al2O3	FeO	MnO	MgO	CaO	Na2O	K2O	BaO	F	Cl	Sum	H2O*	Total
LCM-1	36.331	5.001	13.749	15.864	0.266	13.698	0.013	0.469	8.82	1.33	0.481	0.174	95.96	3.59	99.544
LCM-1	36.562	4.973	13.88	16.086	0.249	13.932	0.011	0.488	8.966	1.184	0.58	0.175	96.8	3.58	100.382
LCM-1	36.744	5.022	13.779	16.672	0.253	14.348	0.004	0.386	9.188	0.544	0.735	0.207	97.53	3.55	101.076
LCM-1	36.58	4.917	13.708	16.514	0.223	14.334	0.014	0.406	9.277	0.523	0.995	0.174	97.21	3.41	100.617
LCM-1	37.007	4.729	13.795	15.64	0.231	14.296	0	0.454	9.004	0.613	0.59	0.166	96.24	3.59	99.829
LCM-1	37.557	4.798	13.576	15.533	0.29	14.287	0.037	0.415	9.146	0.664	0.404	0.185	96.68	3.68	100.36
LCM-1	36.812	4.399	14.143	14.729	0.268	14.832	0.011	0.491	9.096	0.951	1.496	0.049	96.64	3.19	99.826
LCM-1	37.295	4.613	14.459	14.663	0.232	15.091	0	0.442	9.109	0.973	1.606	0.068	97.86	3.19	101.05
LCM-1	37.064	4.89	13.782	15.959	0.268	14.243	0.003	0.416	9.238	0.434	0.473	0.208	96.73	3.65	100.382
LCM-1	36.536	4.829	13.623	15.64	0.242	14.065	0.005	0.455	9.035	0.608	0.596	0.149	95.5	3.55	99.049
LCM-1	36.486	4.776	13.685	15.804	0.316	14.116	0	0.407	9.171	0.546	0.548	0.171	95.76	3.58	99.337
LCM-1	37.025	4.892	13.785	16.409	0.257	14.416	0	0.443	9.286	0.547	0.846	0.194	97.7	3.5	101.2
LCM-1	36.856	4.886	13.787	16.076	0.279	14.188	0.002	0.398	9.203	0.543	0.887	0.189	96.88	3.45	100.328
LCM-1	36.502	4.806	13.429	15.088	0.231	14.632	0.028	0.499	9.069	0.671	0.819	0.101	95.51	3.46	98.967
LCM-1	37.078	4.791	13.538	15.179	0.426	14.868	0.024	0.48	9.228	0.586	0.631	0.098	96.64	3.61	100.249
LCM-1	37.134	4.812	13.992	15.422	0.47	14.786	0.018	0.492	8.996	0.744	0.698	0.109	97.36	3.6	100.955
LCM-1	36.986	4.696	13.699	15.364	0.238	14.489	0	0.466	8.909	0.723	0.655	0.166	96.08	3.55	99.628
LCM-1	37.85	4.657	14.103	12.416	0.083	16.996	0	0.519	9.228	0.552	2.999	0.169	98.27	2.55	100.821
LCM-1	37.921	4.674	14.16	10.915	0.059	17.686	0.015	0.466	9.299	0.584	3.102	0.185	97.72	2.49	100.208
LCM-1	36.675	4.756	13.927	15.901	0.165	14.619	0.001	0.423	9.052	0.903	1.081	0.177	97.19	3.38	100.565
LCM-1	36.975	4.656	13.671	15.785	0.189	14.269	0	0.377	8.962	0.637	0.77	0.175	96.1	3.49	99.592
LCM-1	36.878	4.624	13.605	15.361	0.241	14.606	0	0.556	9.124	0.462	0.672	0.149	95.96	3.55	99.512
LCM-1	36.878	4.624	13.605	15.361	0.241	14.606	0	0.556	9.124	0.462	1.788	0.246	96.68	2.99	99.673
LCM-1	36.768	4.725	13.835	15.222	0.241	14.646	0.012	0.534	8.704	1.022	0.71	0.095	96.19	3.55	99.744
LCM-1	36.419	4.57	13.648	15.597	0.296	14.396	0	0.501	8.793	0.796	1.126	0.099	95.75	3.32	99.065
LCM-1	36.504	4.607	13.863	15.435	0.341	14.45	0.003	0.549	8.761	1.033	0.82	0.108	96.11	3.48	99.584
LCM-1	36.181	4.595	13.723	15.76	0.251	14.07	0.01	0.552	8.739	0.864	0.972	0.085	95.37	3.38	98.754
LCM-1	36.627	4.685	13.614	15.496	0.255	14.818	0	0.558	8.822	1.174	0.976	0.113	96.7	3.42	100.122
LCM-1	37.985	4.512	14.046	14.265	0.276	15.435	0.019	0.561	8.905	0.833	1.411	0.096	97.73	3.29	101.018
LCM-1	36.752	4.738	14.113	15.944	0.347	14.867	0	0.519	8.888	0.992	0.722	0.101	97.66	3.6	101.256
LCM-1	35.867	4.672	13.785	15.724	0.199	13.919	0	0.546	8.988	1.003	0.945	0.103	95.33	3.36	98.69
LCM-1	37.678	3.962	14.374	14.238	0.335	15.394	0	0.363	8.279	0.759	0.529	0.085	95.75	3.7	99.454
LCM-1	37.89	3.956	14.408	14.442	0.166	15.622	0	0.699	8.718	0.533	0.532	0.113	96.83	3.72	100.55
LCM-3	36.818	4.885	13.975	14.295	0.355	15.054	0.04	0.462	8.306	0.921	0.348	0.077	95.37	3.74	99.112
LCM-3	36.936	4.922	14.036	14.16	0.314	15.142	0.042	0.473	8.295	1.046	0.412	0.075	95.66	3.72	99.383
LCM-3	38.257	4.138	13.923	12.352	0.275	16.881	0.075	0.608	8.01	1.069	0.765	0.047	96.07	3.63	99.697
LCM-3	38.252	4.211	13.793	12.369	0.341	16.965	0.045	0.609	8.07	1.129	0.846	0.071	96.33	3.59	99.919
LCM-3	37.559	4.653	14.124	13.485	0.189	15.474	0.036	0.636	8.095	0.87	0.394	0.084	95.41	3.74	99.154
LCM-3	37.778	4.301	13.514	11.709	0.327	16.727	0.039	0.673	8.216	1.128	0.94	0.05	95	3.48	98.475
LCM-3	37.509	4.577	13.837	14.301	0.326	14.56	0	0.428	8.608	1.058	0.445	0.072	95.52	3.67	99.187
LCM-3	36.441	4.664	13.864	14.483	0.362	14.247	0.056	0.444	8.516	1.011	0.384	0.057	94.35	3.65	98.005
LCM-5	35.898	3.497	13.945	19.359	0.441	12.603	0.064	0.237	8.093	0.331	0.371	0.078	94.74	3.67	98.413
LCM-5	36.828	3.766	14.278	17.827	0.424	12.785	0.03	0.134	8.44	0.267	0.467	0.105	95.13	3.64	98.771
LCM-5	36.71	4.307	14.814	13.74	0.337	15.233	0.047	0.616	8.484	1.063	0.403	0.089	95.65	3.72	99.373
LCM-5	36.854	4.222	14.652	13.877	0.319	15.315	0.039	0.528	8.411	1.098	0.331	0.081	95.57	3.76	99.329
LCM-5	36.554	3.796	14.416	15.32	0.352	14.069	0	0.425	8.815	1.061	0.301	0.076	95.04	3.71	98.751
LCM-5	37.008	3.662	14.569	14.893	0.334	14.4	0.007	0.434	8.771	1.246	0.291	0.084	95.56	3.74	99.298
LCM-5	36.522	3.834	14.456	14.935	0.289	14.215	0.01	0.424	8.702	1.104	0.254	0.09	94.71	3.72	98.428
LCM-5	36.726	3.776	14.72	15.471	0.311	14.397	0	0.439	8.765	1.111	0.346	0.071	95.97	3.74	99.711
LCM-5	36.549	4.371	14.411	13.809	0.29	15.19	0.009	0.527	8.659	1.568	0.375	0.078	95.66	3.71	99.371
LCM-5	36.889	4.277	14.392	13.38	0.316	15.395	0.028	0.513	8.613	1.753	0.336	0.082	95.81	3.73	99.544
LCM-5	36.983	4.275	14.31	13.239	0.264	15.373	0.035	0.536	8.393	1.732	0.392	0.059	95.41	3.71	99.123
LCM-5	36.657	4.041	14.973	13.777	0.33	15.6	0.017	0.528	8.411	1.893	0.435	0.043	96.51	3.74	100.252
LCM-5	36.228	4.109	14.491	13.831	0.326	15.312	0	0.607	8.678	1.822	0.341	0.044	95.64	3.72	99.356
LCM-5	35.612	4.263	14.263	14.102	0.311	15.343	0.013	0.514	8.609	1.686	0.378	0.054	94.98	3.68	98.657
LCM-5	35.757	4.212	14.494	13.834	0.293	15.515	0.003	0.529	8.625	1.793	0.372	0.041	95.3	3.7	99.002
LCM-5	35.857	4.089	14.599	13.795	0.348	15.641	0.012	0.526	8.556	1.783	0.344	0.034	95.43	3.73	99.162
LCM-5	35.856	4.096	14.504	13.587	0.327	15.31	0	0.522	8.69	1.631	0.353	0.038	94.76	3.7	98.457
LCM-6	36.903	5.202	13.743	13.425	0.18	15.811	0.022	0.759	8.539		0.719	0.101	95.08	3.57	98.649
LCM-6	36.773	5.291	13.631	13.544	0.228	15.867	0	0.748	8.492		0.694	0.081	95.04	3.59	98.629
LCM-6	36.398	5.414	13.672	13.445	0.191	16.004	0	0.769	8.655		0.857	0.084	95.11	3.5	98.609
LCM-6	37.044	5.435	13.591	12.912	0.176	16.041	0.013	0.778	8.694		0.882	0.102	95.27	3.49	98.764
LCM-6	36.788	5.38	13.887	13.223	0.202	15.378	0.024	0.799	8.526		0.784	0.075	94.72	3.52	98.239
LCM-6	36.327	5.297	13.507	13.317	0.257	16.08	0.015	0.782	8.843		0.735	0.074	94.91	3.55	98.458
LCM-6	37.002	5.331	13.763	13.496	0.261	16.372	0.006	0.773	8.726		0.661	0.066	96.16	3.65	99.814
LCM-6	36.107	5.623	13.585	13.858	0.238	15.455	0.003	0.762	8.661		0.765	0.068	94.79	3.52	98.308
LCM-6	36.501	5.372	13.505	13.086	0.287	15.861	0.043	0.773	8.638		0.73	0.082	94.55	3.54	98.092
LCM-9	37.467	5.124	13.339	12.722	0.21	16.362	0.024	0.774	8.648	1.22	1.293	0.048	96.68	3.32	99.996
LCM-9	37.497	5.002	13.189	12.115	0.233	16.519	0.025	0.745	8.645	1.205	1.419	0.064	96.05	3.24	99.286
LCM-9	36.903	4.928	13.526	15.082	0.387	14.595	0	0.567	9	0.889	0.825	0.144	96.47	3.48	99.946
LCM-9	36.185	5.103	14.089	15.702	0.484	14.214	0.03	0.556	9.002	0.954	0.627	0.125	96.78	3.58	100.359
LCM-9	36.503	5.15	14.127	15.819	0.481	14.359	0.03	0.55	8.934	0.899	0.625	0.134	97.32	3.61	100.928
LCM-9	37.987	4.986	13.498	12.042	0.233	16.251	0.11	0.744	8.212	1.251	1.307	0.067	96.12	3.31	99.433
LCM-9	37.716	5.157	13.581	11.648	0.2	16.696	0.088	0.797	8.321	1.225	1.312	0.059	96.23	3.32	99.554
LCM-9	38.037	4.927	13.139	11.638	0.273	16.704	0	0.768	8.69	0.896	1.419	0.069	95.95	3.25	99.197
LCM-9	37.736	4.864	13.183	12.651	0.244	16.636	0	0.772	8.693	0.878	1.438	0.051	96.53	3.27	99.799
LCM-9	38.056	5.115	13.502	12.149	0.291	17.062	0.102	0.746	8.34	1.216	1.425	0.048	97.44	3.32	100.761
LCM-9	37.526	5.167	13.689	12.307	0.247	17.144	0.092	0.818	8.306	1.251	1.318	0.05	97.35	3.37	100.719
LCM-9	37.681	5.015	13.452	12.055	0.186	16.824	0.109	0.812	8.178	1.053	1.283	0.041	96.14	3.35	99.49
LCM-9	37.553	4.859	13.6	12.022	0.215	16.322	0.111	0.722	8.046	1.108	1.334	0.058	95.38	3.28	98.655
LCM-9	36.941	5.02	13.24	12.189	0.266	16.63	0.108	0.624	7.939	0.985	1.34	0.098	94.79	3.26	98.054
LCM-9	37.743	4.878	13.316	12.386	0.266	16.467	0.002	0.75	8.593	1.046	1.326	0.062	96.26	3.3	99.563
LCM-9	37.882	4.851	13.204	12.29	0.178	16.668	0.004	0.76	8.586	1.011	1.33	0.066	96.26	3.3	99.555
LCM-9	36.181	4.932	13.65	15.133	0.434	14.183	0.032	0.45	8.438	0.886	0.667	0.123	94.8	3.51	98.311
LCM-13	37.559	4.658	14.484	14.437	0.433	14.811	0.117	0.579	8.477		1.579	0.049	96.51	3.21	99.717
LCM-13	37.576	4.803	14.257	14.666	0.462	14.868	0.058	0.577	8.903		2.191	0.063	97.49	2.92	100.407
LCM-13	36.629	5.056	13.931	14.378	0.524	14.614	0.107	0.592	8.202		0.925	0.054	94.61	3.45	98.06
LCM-13	36.962	4.879	13.765	14.001	0.631	15.33	0.05	0.591	8.34		0.898	0.068	95.12	3.49	98.612
LCM-13	37.099	4.937	13.766	13.836	0.638	15.469	0.068	0.626	8.319		0.999	0.051	95.38	3.46	98.836
LCM-13	36.95	4.808	13.891	13.939	0.496	15.52	0.108	0.551	7.906		0.87	0.072	94.73	3.51	98.239
LCM-13	37.12	5.167	13.964	15.254	0.357	14.76	0.09	0.455	8.131		0.63	0.028	95.68	3.65	99.334
LCM-13	37.363	4.925	14.228	15.501	0.368	14.532	0.081	0.536	8.367		0.567	0.034	96.26	3.69	99.946
LCM-13	37.171	4.673	14.49	14.043	0.441	14.837	0.129	0.573	8.51		1.735	0.056	95.92	3.1	99.015
LCM-13	36.789	4.869	13.595	15.57	0.269	14.197	0.012	0.522	9.324		0.758	0.175	95.72	3.48	99.202
LCM-13	37.045	4.869	13.505	16.299	0.222	14.483	0.016	0.535	9.351		1.3	0.152	97.2	3.28	100.476
LCM-14	35.366	5.317	13.622	17.587	0.204	12.709	0	0.647	8.804		0.791	0.088	94.78	3.42	98.202
LCM-14	35.369	5.282	13.349	17.649	0.171	12.762	0	0.651	8.884		0.866	0.115	94.71	3.37	98.078
LCM-14	35.379	5.545	13.777	17.838	0.113	12.493	0.008	0.611	8.708		0.828	0.131	95.05	3.4	98.453
LCM-14	35.472	5.55	13.809	18.052	0.186	12.37	0	0.651	8.901		0.861	0.113	95.58	3.4	98.977
LCM-14	35.746	5.569	13.672	18.587	0.193	12.499	0.014	0.634	8.922		0.757	0.106	96.36	3.48	99.836
LCM-14	35.327	5.525	13.382	18.469	0.109	11.825	0.029	0.607	9.124		0.903	0.111	95.01	3.33	98.336
LCM-14	35.374	5.505	13.582	18.497	0.124	12.14	0	0.609	8.875		0.859	0.109	95.29	3.38	98.668
LCM-14	34.758	6.083	13.511	20.331	0.185	10.876	0.014	0.568	8.661		0.81	0.143	95.57	3.37	98.937
LCM-14	35.011	5.853	13.852	20.139	0.163	10.743	0.063	0.578	8.462		0.807	0.129	95.43	3.38	98.811
LCM-14	35.558	5.316	13.617	17.303	0.153	12.633	0.007	0.652	8.83		0.813	0.089	94.61	3.4	98.009
LCM-16	37.05	4.762	14.353	14.494	0.254	14.349	0.036	0.404	8.533	1.122	0.617	0.128	95.81	3.58	99.393
LCM-16	36.553	4.843	13.931	14.707	0.254	14.44	0.011	0.414	8.694	1.118	0.621	0.141	95.43	3.55	98.984
LCM-16	38.069	4.435	16.649	13.818	0.328	13.644	0.008	0.357	7.934	1.04	0.56	0.115	96.7	3.69	100.385
LCM-16	36.672	4.759	14.002	13.2	0.431	15.473	0.015	0.496	8.326	1.1	0.897	0.066	95.04	3.46	98.505
LCM-16	37.23	4.766	14.338	13.543	0.32	15.467	0.048	0.488	8.302	1.219	0.843	0.073	96.27	3.53	99.796
LCM-16	36.825	4.893	13.892	13.73	0.394	14.969	0.017	0.556	8.331	1.378	0.944	0.068	95.58	3.43	99.014
LCM-16	38.097	4.737	14.258	13.033	0.343	15.503	0.076	0.509	8.203	1.369	0.93	0.061	96.71	3.51	100.224
LCM-16	37.235	4.857	14.088	13.567	0.383	14.915	0.042	0.536	8.235	1.391	0.882	0.087	95.83	3.47	99.297
LCM-16	36.348	4.964	13.844	13.528	0.409	15.089	0.024	0.545	8.514	1.371	1.034	0.068	95.29	3.37	98.657
LCM-16	37.059	4.959	14.068	13.371	0.398	15.306	0.037	0.523	8.352	1.515	0.918	0.075	96.18	3.47	99.648
LCM-16	36.492	4.867	13.521	14.183	0.273	15.256	0.01	0.552	8.774	0.976	0.858	0.085	95.47	3.46	98.927
LCM-16	36.659	4.885	13.754	13.678	0.376	15.171	0.021	0.549	8.719	1.196	0.826	0.09	95.56	3.48	99.036
LCM-18	34.394	4.837	13.457	22.717	0.265	9.618	0.009	0.452	8.823		0.805	0.204	95.2	3.31	98.506
LCM-18	34.917	4.744	13.312	22.679	0.216	9.746	0.032	0.429	8.897		0.835	0.203	95.61	3.31	98.923
LCM-18	34.143	4.617	13.352	25.123	0.243	7.899	0.029	0.381	8.801		0.985	0.335	95.42	3.14	98.558
LCM-18	35.099	4.729	13.146	22.432	0.385	9.616	0.035	0.446	8.701		0.937	0.226	95.31	3.25	98.557
LCM-18	35.543	4.921	13.153	20.893	0.249	10.565	0.021	0.407	9.012		0.84	0.148	95.37	3.34	98.705
LCM-18	36.304	4.756	13.284	20.365	0.206	10.306	0.034	0.41	8.826		0.858	0.152	95.11	3.32	98.426
LCM-18	35.23	4.706	13.553	22.285	0.198	9.846	0.005	0.414	8.736		0.914	0.188	95.65	3.3	98.948
LCM-18	34.093	4.681	13.372	24.921	0.315	7.931	0.043	0.375	8.631		0.915	0.228	95.07	3.2	98.268
LCM-18	34.834	4.589	13.157	24.44	0.359	7.827	0.055	0.369	8.629		0.947	0.131	94.91	3.21	98.119
LCM-18	34.974	4.874	13.179	22.444	0.238	9.705	0.01	0.427	8.775		0.808	0.21	95.26	3.31	98.567
LCM-18	34.973	4.972	13.193	23.059	0.241	9.812	0.005	0.4	8.811		0.876	0.198	96.13	3.32	99.447
LCM-18	34.737	4.757	13.149	22.52	0.281	9.62	0.027	0.439	8.732		0.904	0.192	94.94	3.26	98.194
LCM-18	34.941	4.876	13.575	22.534	0.159	9.789	0.019	0.392	8.81		0.842	0.184	95.73	3.33	99.055
LCM-18	34.135	4.541	13.155	25.673	0.379	7.845	0	0.381	8.825		0.872	0.34	95.7	3.2	98.902
LCM-18	34.512	4.604	13.359	25.114	0.423	8.013	0.01	0.334	8.84		0.898	0.366	96.01	3.2	99.213
LCM-18	34.306	4.695	13.311	24.976	0.312	7.989	0.047	0.374	8.627		0.869	0.318	95.39	3.21	98.597
LCM-18	34.027	4.824	13.219	25.579	0.347	7.844	0	0.373	8.801		0.958	0.337	95.83	3.17	99
LCM-18	35.328	4.315	14.038	20.496	0.113	10.86	0.004	0.58	8.403	1.045	0.853	0.118	95.77	3.36	99.127
LCM-18	35.241	4.423	13.744	20.409	0.191	10.563	0.003	0.545	8.552	0.925	0.895	0.129	95.21	3.3	98.514
LCM-18	34.902	4.333	13.331	24.872	0.348	7.912	0	0.378	8.617	0.764	0.891	0.302	96.21	3.21	99.417
LCM-18	34.606	4.403	13.338	24.739	0.189	7.734	0.003	0.425	8.586	0.857	0.873	0.332	95.64	3.18	98.823
LCM-18	34.304	4.456	13.48	24.337	0.25	7.83	0.022	0.595	8.469	0.872	0.859	0.259	95.31	3.2	98.513
LCM-18	34.736	4.405	13.463	24.6	0.335	7.892	0.011	0.499	8.547	0.752	0.779	0.281	95.91	3.26	99.169
LCM-18	36.646	4.336	13.763	18.349	0.158	12.269	0	0.484	8.475	0.928	0.931	0.131	96.05	3.37	99.419
LCM-18	35.867	4.463	13.647	18.421	0.113	12.168	0.016	0.513	8.439	1.107	0.924	0.135	95.39	3.33	98.724
LCM-18	35.31	4.431	13.638	21.677	0.211	9.883	0	0.776	8.427	0.984	0.777	0.134	95.89	3.35	99.241
LCM-18	35.379	4.451	13.64	21.782	0.156	9.733	0	0.591	8.482	1.082	0.783	0.176	95.89	3.34	99.226
LCM-18	34.693	4.45	13.442	24.626	0.348	7.811	0	0.423	8.449	1.25	0.858	0.28	96.21	3.22	99.426
LCM-18	34.372	4.511	13.415	25.089	0.27	7.876	0	0.353	8.514	1.096	0.838	0.296	96.21	3.23	99.441
LCM-18	34.768	4.479	13.393	25.077	0.257	7.869	0	0.369	8.552	0.834	0.913	0.277	96.34	3.21	99.551
LCM-18	34.552	4.389	13.384	24.438	0.244	7.87	0	0.421	8.643	0.848	0.893	0.302	95.54	3.18	98.72
LCM-18	34.655	4.614	13.475	24.408	0.179	7.88	0	0.51	8.347	1.057	0.834	0.152	95.73	3.26	98.986
LCM-18	34.402	4.414	13.12	24.19	0.304	7.858	0.019	0.42	8.301	1.074	0.928	0.279	94.86	3.14	97.996
LCM-18	35.417	4.431	13.383	21.675	0.177	9.799	0	0.5	8.33	0.977	0.854	0.11	95.27	3.31	98.579
LCM-18	35.107	4.478	13.615	22.476	0.228	9.862	0.003	0.409	7.97	0.934	0.763	0.209	95.69	3.36	99.046
LCM-18	35.236	4.446	13.228	24.928	0.27	7.822	0	0.396	8.346	1.18	0.852	0.29	96.57	3.24	99.81
LCM-19	35.004	4.445	13.484	24.43	0.389	8.069	0.062	0.316	8.538	0.417	0.681	0.326	95.8	3.32	99.121
LCM-19	34.132	4.454	12.841	25.231	0.29	7.647	0.049	0.274	8.669	0.328	0.607	0.313	94.51	3.29	97.799
LCM-19	34.671	4.684	13.492	25.965	0.337	7.681	0.057	0.332	8.585	1.236	0.666	0.34	97.69	3.34	101.029
LCM-19	34.838	4.701	13.251	24.949	0.308	7.625	0.072	0.313	8.567	1.271	0.731	0.327	96.57	3.27	99.842
LCM-19	34.912	4.622	13.5	25.718	0.348	7.823	0.003	0.284	8.642	0.994	0.718	0.345	97.53	3.33	100.859
LCM-19	34.879	4.531	13.249	25.111	0.214	7.705	0	0.286	8.829	0.64	0.723	0.323	96.11	3.28	99.393
LCM-20	36.881	4.667	14.358	18.102	0.266	12.674	0.043	0.427	8.325	1.169	0.78	0.126	97.46	3.51	100.971
LCM-20	37.032	4.832	13.927	12.954	0.333	14.463	0.029	0.466	8.844	0.964	0.782	0.059	94.34	3.46	97.803
LCM-20	35.336	4.808	13.578	21.805	0.242	9.014	0.012	0.313	8.746	1.228	0.612	0.338	95.7	3.34	99.038
LCM-20	34.862	4.885	13.488	21.344	0.253	8.943	0.018	0.309	8.59	1.114	0.609	0.301	94.39	3.31	97.702
LCM-21	38.591	4.436	13.247	14.465	0.372	14.899	0.038	0.521	8.723		1.221	0.086	96.07	3.34	99.406
LCM-21	36.969	4.623	13.193	15.071	0.499	14.848	0.004	0.518	9.044		1.157	0.094	95.51	3.33	98.842
LCM-21	36.338	4.726	13.754	17.449	0.399	14.648	0.019	0.482	8.391		1.054	0.08	96.88	3.46	100.338
LCM-21	36.871	4.755	13.249	14.606	0.365	14.718	0	0.499	9.093		1.161	0.08	94.89	3.3	98.19
LCM-21	37.167	4.609	13.882	14.837	0.485	14.26	0.1	0.547	8.621		1.07	0.078	95.19	3.37	98.558
LCM-21	36.498	4.772	13.897	15.462	0.477	14.281	0	0.534	9.282		1.094	0.071	95.89	3.36	99.251
LCM-21	37.237	4.688	13.251	14.563	0.481	14.917	0	0.51	9.084		1.086	0.084	95.43	3.37	98.795
LCM-21	37.083	4.643	13.647	14.648	0.459	14.736	0	0.548	9.181		1.08	0.082	95.63	3.37	99.004
LCM-21	36.957	4.66	13.624	14.912	0.43	14.769	0.002	0.522	8.985		1.151	0.086	95.59	3.34	98.934
LCM-21	37.305	4.553	13.439	14.705	0.445	15.135	0.002	0.536	9.014		1.205	0.09	95.9	3.34	99.241
LCM-21	37.611	4.586	13.29	14.512	0.394	15.195	0.026	0.549	9.065		1.19	0.074	95.97	3.35	99.324
LCM-21	36.991	4.646	13.58	15.074	0.481	14.566	0.001	0.516	9.02		1.144	0.075	95.6	3.34	98.936
LCM-21	36.265	4.484	13.92	15.094	0.321	14.599	0.024	0.541	8.952	0.573	1.058	0.079	95.45	3.36	98.807
LCM-21	36.735	4.451	13.553	14.75	0.4	14.812	0	0.489	8.743	0.844	1.112	0.083	95.49	3.34	98.825
LCM-21	35.656	4.328	14.31	15.27	0.403	14.372	0	0.571	8.817	1.035	1.125	0.141	95.52	3.29	98.813
LCM-21	36.166	4.314	14.21	15.383	0.386	14.376	0	0.54	8.738	0.904	1.03	0.041	95.65	3.39	99.035
LCM-21	37.372	4.453	13.38	14.633	0.314	14.654	0	0.574	8.656	0.841	1.171	0.091	95.63	3.31	98.936
LCM-21	37.399	4.482	13.481	14.783	0.341	15.183	0	0.499	8.786	0.832	1.156	0.094	96.53	3.36	99.888
LCM-21	35.977	4.603	14.346	15.198	0.313	14.515	0	0.562	8.77	1.092	1.048	0.042	96.02	3.38	99.395
LCM-21	35.846	4.499	14.273	15.681	0.413	14.059	0	0.523	8.624	1.16	1.021	0.082	95.73	3.37	99.103
LCM-21	36.721	4.534	14.292	15.099	0.41	14.487	0	0.492	8.76	0.969	1.034	0.065	96.41	3.41	99.823
LCM-21	37.133	4.474	13.306	14.877	0.348	14.865	0	0.527	8.805	0.857	0.989	0.103	95.84	3.4	99.244
LCM-21	37.172	4.549	13.417	14.767	0.362	15.014	0	0.506	8.789	0.683	1.012	0.067	95.9	3.42	99.317
LCM-21	37.078	4.508	13.4	14.493	0.455	14.548	0	0.563	8.707	0.734	1.073	0.083	95.17	3.34	98.512
LCM-21	36.531	4.328	14.403	14.89	0.345	14.369	0	0.613	8.595	0.996	0.984	0.039	95.67	3.41	99.08
LCM-21	36.651	4.481	14.627	15.047	0.372	15.007	0	0.553	8.683	0.991	1.091	0.067	97.1	3.43	100.526
LCM-22	37.868	5.35	13.385	13.074	0.121	15.752	0.059	0.458	8.615	1.969	1.051	0.083	97.32	3.43	100.754
LCM-22	37.893	5.551	13.197	12.674	0.246	15.792	0.029	0.492	8.503	2.105	1.216	0.06	97.23	3.34	100.573
LCM-22	37.851	5.371	13.012	13.046	0.213	15.942	0.075	0.429	8.506	1.49	1.241	0.081	96.72	3.33	100.046
LCM-22	37.088	5.313	12.989	12.687	0.187	15.535	0.053	0.463	8.394	1.754	1.259	0.076	95.25	3.25	98.501
LCM-22	37.139	5.249	13.091	12.291	0.184	15.678	0.061	0.483	8.554	1.914	1.176	0.065	95.38	3.29	98.665
LCM-22	38.146	5.288	13.102	11.733	0.21	16.323	0.105	0.459	8.383	1.697	1.346	0.077	96.29	3.28	99.565
LCM-22	37.798	5.414	13.296	12.236	0.11	16.23	0.018	0.489	8.721	2.181	1.371	0.069	97.34	3.27	100.61
LCM-22	37.446	5.287	13.147	12.199	0.162	15.791	0.003	0.503	8.624	2.002	1.298	0.065	95.97	3.26	99.226
LCM-22	38.023	5.291	13.193	12.616	0.162	15.903	0.009	0.473	8.737	1.899	1.189	0.054	97.04	3.36	100.396
LCM-22	37.538	5.335	13.1	12.301	0.242	16.244	0.032	0.477	8.643	2.044	1.245	0.061	96.72	3.32	100.044
LCM-22	37.501	5.419	13.343	12.274	0.173	15.95	0.012	0.469	8.716	2.256	1.09	0.062	96.79	3.38	100.172
LCM-22	37.172	5.271	13.321	13.648	0.205	15.217	0	0.499	8.832	1.515	1.116	0.109	96.41	3.34	99.751
LCM-22	37.227	5.324	13.063	13.399	0.169	15.291	0	0.53	8.878	1.483	1.455	0.115	96.3	3.17	99.466
LCM-22	36.384	5.25	13.082	14.337	0.267	14.627	0	0.567	8.902	1.467	1.085	0.111	95.6	3.3	98.897
LCM-22	37.154	5.268	13.443	14.751	0.114	15.151	0	0.558	8.814	1.492	1.281	0.109	97.57	3.3	100.871
LCM-22	37.65	5.364	13.204	12.617	0.195	15.613	0.054	0.463	8.535	1.879	1.114	0.065	96.27	3.36	99.629
LCM-22	38.072	5.323	13.241	12.294	0.239	15.81	0.074	0.434	8.462	1.735	1.062	0.063	96.35	3.41	99.758
LCM-22	37.551	5.39	13.214	12.932	0.198	15.688	0.098	0.428	8.297	1.669	1.134	0.048	96.16	3.37	99.529
LCM-22	37.58	5.428	13.119	13.201	0.206	16.02	0.036	0.466	8.597	1.885	1.046	0.079	97.21	3.43	100.635
LCM-22	37.685	5.317	13.259	12.946	0.231	16.109	0.023	0.454	8.63	1.89	1.162	0.065	97.27	3.38	100.647
LCM-25	38.149	4.951	13.023	12.856	0.259	16.591	0.057	0.59	8.545	0.683	1.43	0.089	96.6	3.28	99.881
LCM-25	38.221	4.965	13.013	12.945	0.335	16.42	0.061	0.561	8.453	0.633	1.507	0.073	96.54	3.24	99.776
LCM-25	37.863	5.163	13.626	12.489	0.314	15.209	0.105	0.45	8.442	0.513	1.307	0.084	95	3.26	98.256
LCM-25	38.118	5.178	13.85	12.323	0.292	15.093	0.12	0.457	8.056	0.519	1.222	0.091	94.78	3.31	98.094
LCM-25	38.48	4.926	12.764	12.208	0.288	16.707	0.081	0.519	8.217	0.575	1.483	0.089	95.69	3.24	98.933
LCM-25	38.122	4.874	12.96	12.459	0.288	16.655	0.044	0.586	8.251	0.595	1.447	0.089	95.74	3.25	98.991
LCM-26	37.982	5.155	13.288	12.884	0.317	15.99	0.061	0.55	8.583	0.704	1.319	0.085	96.34	3.31	99.654
LCM-26	36.874	4.783	13.603	15.498	0.319	15.584	0.113	0.525	7.915	0.657	1.318	0.081	96.7	3.33	100.027
LCM-26	36.798	5.26	13.099	12.537	0.331	15.873	0.092	0.637	8.523	1.02	1.358	0.092	95.03	3.21	98.238
LCM-26	36.633	4.894	14.538	14.075	0.331	16.142	0.019	0.547	8.729	0.826	1.278	0.043	97.51	3.39	100.897
LCM-29	36.91	4.137	14.1	15.928	0.261	14.184	0.051	0.515	8.107	0.6	0.406	0.095	95.1	3.69	98.792
LCM-29	37.062	4.24	14.141	14.785	0.276	14.308	0.057	0.462	8.225	0.465	0.687	0.097	94.49	3.54	98.034
LCM-30	34.966	4.607	13.557	24.669	0.202	8.746	0.011	0.443	8.831		0.76	0.213	96.64	3.36	99.997
LCM-30	34.629	4.588	13.333	23.916	0.252	8.466	0.003	0.423	8.863		0.786	0.206	95.09	3.28	98.368
LCM-30	34.298	4.415	13.496	24.075	0.184	9.415	0.116	0.399	8.045		0.673	0.189	94.98	3.39	98.369
LCM-30	34.701	4.289	13.79	21.762	0.231	9.322	0.093	0.407	7.906		0.73	0.176	93.06	3.31	96.37
LCM-31	36.099	3.978	14.107	18.748	0.322	12.163	0.014	0.453	8.826	1.12	0.318	0.132	96.12	3.66	99.776
LCM-31	35.157	3.816	13.934	20.331	0.367	11.543	0	0.383	8.828	0.951	1.041	0.118	96	3.28	99.284
LCM-31	35.874	3.972	14.277	18.553	0.344	11.312	0	0.529	8.956	0.978	0.273	0.108	95.04	3.62	98.657
LCM-31	35.319	3.998	14.08	19.765	0.444	11.116	0	0.484	8.924	0.921	0.257	0.105	95.28	3.64	98.921
LCM-31	36.126	3.974	14.015	18.783	0.402	11.418	0	0.509	8.762	0.943	0.214	0.121	95.15	3.66	98.81
LCM-31	35.038	4.024	14.795	19.178	0.351	11.135	0	0.502	8.808	0.913	0.315	0.139	95.03	3.6	98.634
LCM-31	37.223	4.671	13.324	13.115	0.402	15.737	0.039	0.381	8.204	1.136	1.226	0.068	94.99	3.31	98.305
LCM-31	37.83	4.554	13.358	13.271	0.264	15.721	0.004	0.375	8.528	1.351	1.142	0.089	95.99	3.36	99.346
LCM-35	33.718	7.099	13.827	19.881	0.251	9.565	0	0.561	7.833	2.971	0.477	0.076	96.04	3.46	99.501
LCM-35	33.456	7.107	13.977	18.88	0.204	9.459	0.007	0.522	7.934	3.016	0.481	0.075	94.9	3.41	98.309
H2O* = H2O alulated on the assumption that the OH site is full

## Sheet: Pyroxene
Electron microprobe analyses of pyroxene from volcanic ash beds in the Morrison Formation (wt%)												End Members
Samp #	Grain	SiO2	TiO2	Al2O3	FeO t	MnO	MgO	CaO	Na2O	Total		Wollastonite	Enstatite	Ferrosillite
MC-8	1 core	48.12	0.468	4.082	13.801	0.886	8.94	21.832	1.237	99.366		0.477287	0.271897	0.250816
MC-8	1 rim	49.313	0.343	3.663	13.984	1.074	8.733	21.453	1.222	99.785		0.472884	0.267799	0.259317
MC-8	3 core	50.75	0.33	2.754	13.27	0.784	9.229	19.471	2.643	99.231		0.449804	0.296599	0.253598
MC-8	3 rim	50.373	0.375	2.367	11.905	0.734	10.019	20.815	1.881	98.469		0.466434	0.312333	0.221233
MC-8	4 core	50.519	0.357	2.369	11.248	1.121	10.825	22.152	0.933	99.524		0.472553	0.321252	0.206195
MC-8	4 rim	51.932	0.194	1.935	10.986	1.319	11.425	22.054	0.812	100.657		0.463651	0.334149	0.2022
MC-8	5 core	50.005	0.368	2.266	12.046	0.867	10.155	20.936	1.879	98.522		0.463686	0.312889	0.223425
MC-8	5 rim	51.057	0.366	2.226	11.892	0.934	10.762	21.072	1.761	100.07		0.457446	0.325018	0.217536
MC-8	6 core	50.991	0.153	1.565	10.837	1.185	11.202	22.341	0.806	99.08		0.472121	0.329326	0.198553
MC-8	8 core	49.184	0.237	2.612	12.984	1.49	9.466	21.585	1.159	98.717		0.468563	0.285866	0.245571
MC-8	10 core	50.098	0.255	2.584	12.637	1.255	9.897	21.804	1.083	99.613		0.469627	0.296552	0.233822
MC-8	10 core2	50.102	0.207	2.011	11.499	1.242	10.95	22.102	0.896	99.009		0.467345	0.322107	0.210548
MC-8	16 core	46.868	0.775	4.696	13.802	1.023	8.288	21.38	1.37	98.202		0.480537	0.259148	0.260314
MC-8	18	48.52	0.481	3.823	13.501	0.98	8.992	21.508	1.377	99.182		0.474473	0.275961	0.249567
MC-27.5	1 core	52.314	0.173	1.151	8.856	0.674	13.492	21.781	0.334	98.775		0.453808	0.391067	0.155125
MC-27.5	1 b rim	52.553	0.161	1.242	9.023	0.636	13.723	21.672	0.352	99.362		0.448615	0.395188	0.156197
MC-27.5	1 c core	52.197	0.192	1.387	9.119	0.695	13.085	21.639	0.38	98.694		0.455465	0.383152	0.161383
MC-27.5	1 e core	52.292	0.147	0.982	8.995	0.669	13.687	21.715	0.338	98.825		0.449531	0.394174	0.156294
MC-36.5	2 core	49.744	0.334	3.325	12.119	0.582	9.769	21.881	1.399	99.153		0.482057	0.299406	0.218537
MC-36.5	2 core3	48.446	0.43	3.901	12.312	0.534	9.393	21.992	1.249	98.257		0.487719	0.289794	0.222487
MC-36.5	2 rim	47.552	0.475	4.884	13.593	0.603	8.521	21.361	1.721	98.71		0.482169	0.267577	0.250254
MC-36.5	19 rim	43.828	1.043	8.186	12.295	0.39	8.952	22.827	0.667	98.188		0.50518	0.275611	0.219209

## Sheet: Amphibole
Electron microprobe analyses of amphibole from volcanic ash beds in the Morrison Formation (wt%)
Sample	Grain	Location	SiO2	TiO2	Al2O3	FeOt	MnO	MgO	CaO	Na2O	K2O	F	Cl	Subsum	H2O	Total
LCM-32	amph1.1	Little Cedar Mountain	47.002	1.333	7.314	13.648	0.547	13.753	11.358	1.405	0.811	0.389	0.126	97.494	1.833	99.327
LCM-32	amph1.2	Little Cedar Mountain	46.377	1.318	7.07	13.56	0.505	13.676	11.44	1.402	0.808	0.355	0.126	96.459	1.824	98.283
LCM-32	amph1.3	Little Cedar Mountain	46.975	1.316	7.542	14.258	0.556	13.64	11.389	1.366	0.949	0.376	0.128	98.308	1.854	100.162
LCM-32	amph2.1	Little Cedar Mountain	46.09	1.402	7.626	13.974	0.619	13.33	11.512	1.495	0.89	0.52	0.146	97.352	1.749	99.101
LCM-32	amph2.2	Little Cedar Mountain	46.478	1.36	7.716	13.747	0.592	13.656	11.407	1.425	0.913	0.408	0.113	97.618	1.827	99.445
LCM-32	amph2.3	Little Cedar Mountain	46.018	1.477	7.98	14.216	0.463	13.298	11.398	1.424	0.943	0.343	0.143	97.526	1.843	99.369
LCM-32	amph2.4	Little Cedar Mountain	45.62	1.428	7.589	13.747	0.494	13.237	11.47	1.489	0.907	0.493	0.136	96.372	1.744	98.116
LCM-32	amph3.1	Little Cedar Mountain	46.878	1.26	7.074	13.547	0.536	13.914	11.369	1.493	0.959	0.324	0.155	97.338	1.85	99.188
LCM-32	amph3.2	Little Cedar Mountain	45.842	1.332	7.715	13.573	0.585	13.428	11.26	1.408	0.858	0.489	0.128	96.383	1.76	98.143
LCM-32	amph3.3	Little Cedar Mountain	47.258	1.21	6.463	12.735	0.474	14.2	11.591	1.283	0.688	0.464	0.111	96.257	1.779	98.036
LCM-32	amph3.4	Little Cedar Mountain	47.249	1.227	6.704	13.352	0.533	14.124	11.306	1.381	0.792	0.412	0.117	96.997	1.82	98.817
LCM-32	amph3.5	Little Cedar Mountain	47.5	1.272	6.776	13.221	0.575	14.147	11.325	1.352	0.775	0.423	0.119	97.28	1.821	99.101
LCM-32	amph4.1	Little Cedar Mountain	45.589	1.491	8.055	14.064	0.553	13.37	11.484	1.503	0.932	0.409	0.14	97.386	1.808	99.194
LCM-32	amph4.2	Little Cedar Mountain	46.605	1.359	7.139	13.505	0.62	13.893	11.354	1.326	0.781	0.427	0.128	96.928	1.806	98.734
LCM-32	amph4.3	Little Cedar Mountain	45.716	1.36	7.48	14.006	0.525	13.326	11.446	1.418	0.874	0.462	0.117	96.509	1.769	98.278
LCM-32	amph4.5	Little Cedar Mountain	46.672	1.37	7.262	13.872	0.599	13.663	11.448	1.424	0.831	0.402	0.115	97.463	1.825	99.288
LCM-32	amph5.3	Little Cedar Mountain	44.81	1.544	8.349	14.194	0.442	12.732	11.453	1.513	0.969	0.378	0.142	96.335	1.79	98.125
LCM-32	am1a	Little Cedar Mountain	45.122	1.626	8.135	15.089	0.695	12.644	11.343	1.508	1.002	0.376	0.126	97.479	1.816	99.295
LCM-32	am1b rim	Little Cedar Mountain	47	1.276	6.901	13.533	0.643	13.77	11.48	1.328	0.764	0.406	0.111	97.016	1.819	98.835
LCM-32	am2a c	Little Cedar Mountain	45.033	1.494	8.112	15.147	0.688	12.918	11.303	1.475	0.975	0.354	0.132	97.452	1.832	99.284
LCM-32	am2b r	Little Cedar Mountain	46.532	1.266	7.162	13.986	0.591	13.464	11.46	1.343	0.848	0.415	0.097	96.967	1.812	98.779
LCM-32	am3a c	Little Cedar Mountain	45.235	1.491	8.362	15.221	0.603	12.829	11.395	1.519	1.033	0.365	0.149	98.015	1.831	99.846
LCM-32	am3b r	Little Cedar Mountain	47.352	1.148	6.589	13.527	0.794	13.766	11.476	1.172	0.735	0.476	0.089	96.904	1.79	98.694
LCM-32	am4a c	Little Cedar Mountain	45.192	1.701	8.924	14.822	0.617	12.586	11.464	1.506	1.037	0.406	0.119	98.176	1.82	99.996
LCM-32	am4b r	Little Cedar Mountain	46.729	1.317	6.883	13.172	0.677	13.918	11.584	1.362	0.825	0.432	0.091	96.788	1.804	98.592
LCM-32	am5b c	Little Cedar Mountain	46.717	1.378	7.303	14.4	0.69	13.571	11.451	1.413	0.874	0.443	0.096	98.128	1.822	99.95
LCM-32	am6c	Little Cedar Mountain	46.408	1.363	7.432	14.41	0.772	13.265	11.516	1.383	0.885	0.47	0.127	97.805	1.788	99.593
LCM-32	am6e	Little Cedar Mountain	45.98	1.398	7.536	14.16	0.704	13.184	11.466	1.38	0.882	0.415	0.12	97.023	1.802	98.825
LCM-32	am7c	Little Cedar Mountain	46.352	1.417	7.606	14.417	0.669	13.022	11.578	1.433	0.858	0.422	0.102	97.675	1.811	99.486
LCM-32	am7e	Little Cedar Mountain	45.489	1.467	7.635	14.576	0.679	12.847	11.459	1.398	0.93	0.437	0.123	96.828	1.778	98.606
LCM-32	am8c	Little Cedar Mountain	45.414	1.488	7.913	14.084	0.686	12.74	11.639	1.465	0.942	0.467	0.133	96.744	1.754	98.498
LCM-32	am8r	Little Cedar Mountain	47.968	1.276	6.632	13.374	0.581	14.151	11.586	1.196	0.705	0.42	0.081	97.775	1.843	99.618
LCM-32	am10c	Little Cedar Mountain	48.237	1.131	6.328	13.643	0.65	14.225	11.484	1.166	0.653	0.487	0.074	97.856	1.818	99.674
LCM-32	am10r	Little Cedar Mountain	46.617	1.423	7.593	13.697	0.584	13.52	11.567	1.414	0.777	0.411	0.087	97.497	1.828	99.325
LCM-32	am11c	Little Cedar Mountain	46.181	1.339	7.48	14.215	0.642	13.219	11.56	1.377	0.885	0.48	0.106	97.258	1.776	99.034
LCM-32	am11r	Little Cedar Mountain	45.106	1.438	7.8	14.888	0.754	12.739	11.383	1.487	0.888	0.449	0.109	96.827	1.774	98.601
LCM-32	am12c	Little Cedar Mountain	46.543	1.293	7.229	13.905	0.718	13.264	11.583	1.368	0.81	0.472	0.102	97.065	1.779	98.844
LCM-32	am12r	Little Cedar Mountain	45.228	1.478	8.1	14.635	0.723	12.739	11.406	1.505	0.961	0.454	0.127	97.136	1.774	98.91
LCM-32	am13r	Little Cedar Mountain	44.602	1.773	8.777	14.779	0.713	12.151	11.514	1.54	1.077	0.421	0.142	97.28	1.777	99.057
LCM-32	am13r	Little Cedar Mountain	45.471	1.469	7.882	14.504	0.655	12.843	11.535	1.464	0.926	0.399	0.12	97.073	1.801	98.874
LCM-32	am14c	Little Cedar Mountain	45.703	1.447	7.86	14.634	0.706	12.902	11.482	1.468	1.02	0.393	0.131	97.551	1.812	99.363
LCM-32	am14r	Little Cedar Mountain	44.935	1.451	8.414	14.536	0.651	12.524	11.546	1.54	1.001	0.379	0.13	96.918	1.8	98.718
LCM-32	am15c	Little Cedar Mountain	45.661	1.537	7.933	14.628	0.672	12.943	11.428	1.439	0.959	0.344	0.105	97.481	1.843	99.324
LCM-32	am15r	Little Cedar Mountain	44.881	1.603	8.327	14.58	0.614	12.296	11.611	1.521	0.982	0.682	0.107	96.893	1.653	98.546
LCM-32	am16c	Little Cedar Mountain	46.298	1.409	7.811	14.212	0.673	13.068	11.411	1.487	0.876	0.583	0.118	97.674	1.733	99.407
LCM-32	am16e	Little Cedar Mountain	45.911	1.428	8.359	14.896	0.744	13.144	11.46	1.539	0.953	0.435	0.116	98.776	1.826	100.602
LCM-32	am17c	Little Cedar Mountain	46.273	1.492	7.628	14.28	0.796	12.935	11.559	1.441	0.854	0.37	0.103	97.552	1.832	99.384
LCM-32	am17r	Little Cedar Mountain	45.966	1.5	7.896	14.495	0.587	13.029	11.506	1.456	0.948	0.471	0.127	97.754	1.782	99.536
LCM-32	am18c	Little Cedar Mountain	46.607	1.425	7.745	14.169	0.67	13.457	11.441	1.397	0.856	0.431	0.113	98.104	1.823	99.927
LCM-32	am18e	Little Cedar Mountain	45.884	1.525	8.214	14.709	0.72	12.872	11.493	1.454	0.96	0.356	0.123	98.132	1.847	99.979
LCM-32	am19c	Little Cedar Mountain	46.712	1.353	7.3	13.982	0.718	13.749	11.528	1.338	0.84	0.474	0.108	97.878	1.803	99.681
LCM-32	am19e	Little Cedar Mountain	45.528	1.441	7.827	13.882	0.67	13.102	11.579	1.475	0.92	0.462	0.126	96.789	1.766	98.555
LCM-32	am20c	Little Cedar Mountain	44.991	1.54	8.478	14.634	0.686	12.38	11.402	1.529	1.064	0.441	0.151	97.076	1.768	98.844
LCM-32	am20e	Little Cedar Mountain	46.825	1.304	7.015	14.239	0.639	13.497	11.461	1.385	0.83	0.512	0.082	97.555	1.78	99.335
LCM-32	am21c	Little Cedar Mountain	47.627	1.276	6.873	13.736	0.691	13.466	11.533	1.267	0.772	0.48	0.099	97.596	1.794	99.39
LCM-32	am21r	Little Cedar Mountain	46.709	1.305	7.067	14.301	0.68	13.324	11.595	1.37	0.85	0.443	0.112	97.544	1.799	99.343
LCM-32	am22c	Little Cedar Mountain	47.075	1.397	7.477	14.372	0.635	13.567	11.519	1.333	0.829	0.377	0.1	98.5	1.865	100.365
LCM-32	am22r	Little Cedar Mountain	46.141	1.347	7.231	14.088	0.707	13.288	11.513	1.373	0.84	0.418	0.122	96.865	1.796	98.661
LCM-32	am23c	Little Cedar Mountain	47.446	1.235	6.95	13.542	0.787	14.063	11.506	1.263	0.768	0.495	0.101	97.925	1.803	99.728
LCM-32	am23r	Little Cedar Mountain	47.634	1.23	6.385	13.154	0.616	14.047	11.7	1.341	0.689	0.392	0.092	97.094	1.832	98.926
LCM-32	am24r	Little Cedar Mountain	45.981	1.412	7.654	14.334	0.741	13.234	11.529	1.501	0.885	0.378	0.112	97.577	1.83	99.407
LCM-32	am24c	Little Cedar Mountain	46.691	1.33	7.535	14.182	0.673	13.342	11.435	1.376	0.802	0.396	0.104	97.676	1.835	99.511
LCM-32	am25c	Little Cedar Mountain	46.021	1.358	7.689	14.397	0.645	13.013	11.557	1.389	0.941	0.39	0.105	97.317	1.818	99.135
LCM-32	am25r	Little Cedar Mountain	43.854	1.655	8.672	15.041	0.682	12.216	11.462	1.605	1.031	0.445	0.142	96.586	1.751	98.337
LCM-32	am26r	Little Cedar Mountain	46.746	1.344	7.014	13.777	0.65	13.347	11.526	1.338	0.814	0.445	0.108	96.897	1.789	98.686
MC-8	12 core	Montezuma Creek	39.66	1.549	11.35	19.546	0.926	8.838	11.104	2.304	1.723	0.303	0.009	97.182	1.801	98.983
MC-8	13 rim	Montezuma Creek	37.96	1.789	13.618	20.583	0.767	7.602	11.078	2.437	1.853	0.33	0	97.878	1.792	99.67
MC-8	15 core	Montezuma Creek	37.332	1.567	13.237	21.082	0.806	7.464	11.107	2.157	2.352	0.243	0.023	97.263	1.804	99.067
MC-8	15 rim	Montezuma Creek	36.981	1.602	13.045	20.582	0.763	7.605	11.155	2.121	2.329	0.283	0.004	96.35	1.771	98.121
MC-8	17	Montezuma Creek	39.295	1.766	11.012	19.108	1.017	8.746	11.191	2.378	1.747	0.617	0.014	96.628	1.627	98.255
MC-8	20 core	Montezuma Creek	37.553	2.006	12.792	20.107	0.804	7.669	11.111	2.138	2.221	0.283	0.028	96.587	1.772	98.359
MC-8	20 rim	Montezuma Creek	37.334	1.723	12.936	20.363	0.818	7.702	11.03	2.098	2.163	0.263	0.029	96.342	1.782	98.124
MC-8	23 rim	Montezuma Creek	37.726	1.937	13.066	20.113	0.779	7.896	11.112	2.166	1.903	0.328	0.008	96.894	1.774	98.668
MC-8	24 core	Montezuma Creek	39.211	1.557	12.17	18.963	0.69	8.659	11.056	2.43	1.897	0.407	0.034	96.895	1.736	98.631
MC-8	25 core	Montezuma Creek	37.147	1.785	13.024	20.396	0.742	7.848	11.23	2.173	2.179	0.376	0.024	96.76	1.733	98.493
MC-8	26 core	Montezuma Creek	37.373	2.437	13.035	19.252	0.838	8.107	11.199	2.199	2.02	0.277	0.021	96.637	1.786	98.423
		Montezuma Creek
MC-27.5	2 core	Montezuma Creek	45.065	2.406	9.599	12.72	0.207	14.285	10.88	1.77	0.816	0.531	0.045	98.09	1.818	99.908
MC-27.5	3 rim	Montezuma Creek	44.839	1.616	8.742	15.883	0.409	12.344	11.048	1.485	0.972	0.306	0.111	97.601	1.865	99.466
MC-27.5	3 core	Montezuma Creek	44.804	1.615	8.461	15.275	0.38	12.678	11.092	1.434	0.993	0.294	0.117	96.993	1.859	98.852
MC-27.5	4 core	Montezuma Creek	45.097	1.718	9.598	13.78	0.285	13.986	10.617	1.751	0.679	0.527	0.057	97.86	1.817	99.677
MC-27.5	5 b core	Montezuma Creek	39.831	1.097	12.649	24.84	0.608	6.158	8.587	1.847	1.764	0.453	0.057	97.687	1.753	99.44
MC-27.5	6 rim	Montezuma Creek	45.389	1.737	8.927	13.963	0.399	13.651	10.858	1.399	0.965	0.315	0.126	97.568	1.883	99.451
MC-27.5	7	Montezuma Creek	45.741	1.749	8.118	13.121	0.356	14.238	11.034	1.399	0.754	0.322	0.089	96.765	1.879	98.644
MC-27.5	8 core	Montezuma Creek	47.138	1.626	7.729	12.427	0.382	15.069	10.896	1.313	0.655	0.277	0.079	97.457	1.938	99.395
MC-27.5	8 rim	Montezuma Creek	46.479	1.727	8.156	12.577	0.341	14.727	10.811	1.403	0.71	0.386	0.067	97.206	1.877	99.083
MC-27.5	22 core	Montezuma Creek	44.202	1.714	9.139	14.975	0.502	12.641	10.96	1.439	1.081	0.29	0.117	96.912	1.861	98.773
MC-27.5	22 rim	Montezuma Creek	44.269	1.716	9.345	13.897	0.447	13.894	10.929	1.314	1.045	0.384	0.078	97.139	1.856	98.995
MC-27.5	27	Montezuma Creek	43.982	2.524	10.241	12.078	0.256	14.623	10.889	1.813	0.839	0.52	0.035	97.573	1.819	99.392
MC-27.5	28 b	Montezuma Creek	44.839	1.696	8.946	13.488	0.337	13.991	10.691	1.591	0.659	0.551	0.042	96.59	1.78	98.37
MC-27.5	29	Montezuma Creek	44.974	1.753	8.891	12.943	0.363	14.259	10.912	1.348	0.936	0.297	0.099	96.628	1.887	98.515
MC-36.5	4 core	Montezuma Creek	38.734	1.958	14	19.2	0.599	8.189	11.16	2.58	1.782	0.193	0.015	98.325	1.874	100.199
MC-36.5	4 rim	Montezuma Creek	38.361	1.675	13.699	20.083	0.638	7.542	10.956	2.638	1.572	0.356	0.015	97.382	1.772	99.154
MC-36.5	7 core	Montezuma Creek	37.856	1.912	13.995	18.762	0.518	8.2	11.456	2.668	1.438	0.262	0.004	96.96	1.814	98.774
MC-36.5	7 rim	Montezuma Creek	38.023	1.888	13.772	19.116	0.635	7.819	11.198	2.433	1.573	0.227	0.011	96.597	1.823	98.42
MC-36.5	8 rim2	Montezuma Creek	38.682	1.614	13.461	19.445	0.58	8.151	11.161	2.679	1.852	0.25	0.014	97.781	1.828	99.609
MC-36.5	16 core	Montezuma Creek	37.964	1.588	13.581	18.726	0.479	8.718	11.258	2.733	1.439	0.22	0.008	96.62	1.834	98.454
		Montezuma Creek
MC-47	1 core	Montezuma Creek	48.099	1.063	6.096	13.321	0.522	14.418	11.431	1.128	0.579	0.329	0.067	96.899	1.881	98.78
MC-47	4 core	Montezuma Creek	46.885	1.607	7.439	12.166	0.471	14.983	11.134	1.32	0.652	0.347	0.073	96.914	1.886	98.8
MC-47	4 rim	Montezuma Creek	47.648	1.718	8.069	12.44	0.382	15.388	10.83	1.305	0.674	0.372	0.075	98.728	1.927	100.655
MC-47	5	Montezuma Creek	51.255	0.666	4.53	12.471	0.616	15.854	11.512	0.604	0.371	0.256	0.046	98.063	1.979	100.042
MC-47	7 rim	Montezuma Creek	47.841	1.606	7.64	12.301	0.401	15.234	11.023	1.293	0.695	0.325	0.091	98.293	1.929	100.222
MC-47	8 rim	Montezuma Creek	48.919	0.95	5.817	12.748	0.615	14.781	11.462	0.97	0.541	0.233	0.05	96.977	1.944	98.921
MC-47	9 rim	Montezuma Creek	45.065	2.059	8.685	12.931	0.352	13.898	11.008	1.54	0.78	0.409	0.084	96.62	1.829	98.449
MC-47	10 rim	Montezuma Creek	44.925	1.346	11.717	10.273	0.078	15.289	10.701	1.941	0.492	0.125	0.041	96.866	2.031	98.897

## Sheet: Titanite
Electron microprobe analyses of titanite from volcanic ash beds in the Morrison Formation (wt%)
Sample	Grain	Spot	SiO2	TiO2	Al2O3	FeO	MnO	MgO	CaO	Nb2O5	Ta2O5	Y2O3	La2O3	Ce2O3	Nd2O3	Sm2O3	F	Sum	O=F	Total
LCM-1	a	a.2	28.766	33.443	1.512	2.332	0.127	0.05	24.639	0.322		1.02	0.501	2.014	1.406	1.386	0.385	97.903	0.162112	97.7409
LCM-1	a	a.3	29.571	34.509	1.46	2.068	0.148	0.025	25.719	0.175		0.541	0.497	1.415	0.828	0.929	0.382	98.267	0.160849	98.1062
LCM-1	a	a.4	29.172	34.42	1.391	1.96	0.115	0.015	25.039	0.316		0.847	0.441	1.662	1.219	1.27	0.267	98.134	0.112426	98.0216
LCM-1	a	a.5	29.406	34.455	1.532	2.053	0.116	0.024	25.137	0.228		0.864	0.353	1.6	1.147	1.27	0.319	98.504	0.134321	98.3697
LCM-1	b	b.1	29.482	35.877	1.309	1.78	0.108	0.02	26.634	0.24		0.338	0.407	1.25	0.437	0.465	0.379	98.726	0.159586	98.5664
LCM-1	b	b.2	29.739	35.711	1.273	1.766	0.134	0.027	26.669	0.179		0.282	0.395	1.341	0.469	0.434	0.438	98.857	0.184429	98.6726
LCM-1	b	b.3	29.496	36.032	1.177	1.58	0.125	0.014	26.372	0.238		0.285	0.385	1.251	0.522	0.437	0.334	98.248	0.140637	98.1074
LCM-1	b	b.4	29.561	35.306	1.26	1.899	0.136	0.012	26.244	0.219		0.427	0.336	1.399	0.613	0.657	0.377	98.446	0.158743	98.2873
LCM-1	c	c.1	29.321	34.664	1.409	1.865	0.167	0.011	26.105	0.201		0.433	0.343	1.176	0.524	0.568	0.37	97.157	0.155796	97.0012
LCM-1	c	c.2	29.275	34.832	1.321	1.798	0.134	0.008	25.803	0.234		0.586	0.32	1.499	0.792	0.86	0.308	97.77	0.12969	97.6403
LCM-1	c	c.3	29.535	34.474	1.43	1.905	0.133	0.009	25.688	0.154		0.579	0.441	1.436	0.77	0.81	0.412	97.776	0.173481	97.6025
LCM-1	c	c.4	29.345	35.143	1.154	1.704	0.125	0.011	25.237	0.293		0.72	0.469	1.589	0.957	0.973	0.222	97.942	0.0934775	97.8485
LCM-1	d	d.1	29.528	35.386	1.256	1.546	0.205	0.018	26.051	0.686		0.51	0.407	1.514	0.74	0.787	0.237	98.871	0.0997936	98.7712
LCM-1	d	d.2	29.591	35.33	1.274	1.79	0.239	0.035	26.225	0.423		0.58	0.322	1.15	0.611	0.756	0.294	98.62	0.123795	98.4962
LCM-1	d	d.3	29.717	34.474	1.287	1.885	0.251	0.017	26.265	0.453		0.557	0.258	1.129	0.651	0.654	0.39	97.988	0.164217	97.8238
LCM-1	d	d.4	29.6	34.668	1.36	1.942	0.217	0.016	26.099	0.423		0.574	0.316	1.116	0.593	0.628	0.455	98.007	0.191587	97.8154
LCM-1	e	1.1	29.3774	35.8877	1.33585	1.84959	0.223382	0	26.3425	0.333312	0.129431	0.394951	0.337759	1.3294	0.783809	0.141467	0.382	98.8485	0.160849	98.6877
LCM-1	e	1.2	29.6298	35.6292	1.34341	1.80074	0.178189	0	26.8224	0.394825	0	0.308595	0.30023	0.975672	0.578526	0.110159	0.249	98.3207	0.104846	98.2159
LCM-1	f	2.1	29.0372	34.8819	1.43977	1.94856	0.102007	0	25.7003	0.46349	0	0.721325	0.403434	2.00639	1.15938	0.288733	0.237	98.3895	0.0997936	98.2897
LCM-1	g	3.1	29.3538	34.8319	1.46056	2.05267	0.225965	0	26.3201	0.321868	0.0964629	0.576552	0.344795	1.49806	0.898115	0.205244	0.368	98.5541	0.154954	98.3991
LCM-1	h	4.1	29.5271	35.1355	1.3094	2.0848	0.262119	0	26.5622	0.339034	0.29061	0.471147	0.432753	1.61402	0.838629	0.179733	0.278	99.325	0.117057	99.2079
LCM-6	a	1.1	29.1292	33.7994	1.27161	2.40356	0.330554	0.00497483	24.5417	0.650889	0	1.13659	0.499601	2.10361	1.28652	0.413966	0	97.5722	0	97.5722
LCM-6	b	2.1	29.5998	34.8135	1.43221	2.40356	0.34734	0	25.4792	0.336173	0	1.01468	0.294366	1.21461	1.05091	0.287573	0.198	98.472	0.0833719	98.3886
LCM-6	b	2.2	29.4544	35.2239	1.24705	2.02567	0.290526	0	25.0259	0.442032	0.074484	1.01976	0.381151	1.51446	1.16638	0.306126	0.111	98.2827	0.0467388	98.236
LCM-6	c	3.1	29.602	35.5274	1.30562	1.83159	0.227256	0	25.9815	0.276091	0.1392	0.457178	0.438617	1.52851	0.832798	0.176254	0.362	98.686	0.152427	98.5336
LCM-6	d	4.1	29.5699	34.4916	1.3453	2.73003	0.371873	0	25.5156	0.241759	0	0.958803	0.311958	1.33877	0.927275	0.235392	0.477	98.5152	0.20085	98.3144
LCM-6	e	e.1	29.193	34.219	1.304	2.483	0.276	0.019	25.496	0.272		0.99	0.26	1.195	0.934	0.978	0.389	98.008	0.163796	97.8442
LCM-6	e	e.2	29.251	34.209	1.202	2.5	0.279	0.021	25.333	0.265		1	0.283	1.366	0.939	0.936	0.365	97.949	0.153691	97.7953
LCM-6	e	e.3	29.176	34.48	1.27	2.392	0.345	0.015	25.391	0.237		0.919	0.373	1.235	0.862	0.824	0.468	97.987	0.197061	97.7899
LCM-6	e	e.4	28.902	33.848	1.401	2.748	0.276	0.025	25.073	0.279		1.118	0.326	1.322	0.967	1.06	0.418	97.763	0.176007	97.587
LCM-6	e	e.5	28.907	33.897	1.344	2.595	0.28	0.02	25.04	0.258		1.141	0.29	1.407	1.076	1.094	0.315	97.664	0.132637	97.5314
LCM-6	e	e.6	28.686	34.385	1.118	2.282	0.259	0.017	24.546	0.352		1.214	0.451	1.792	1.16	1.265	0.296	97.823	0.124637	97.6984
LCM-6	e	e.7	28.939	34.509	1.188	2.282	0.293	0.027	24.722	0.422		1.144	0.444	1.618	1.126	1.118	0.338	98.17	0.142322	98.0277
LCM-9	c	1.1	29.2233	33.8828	1.29239	2.94211	0.364126	0.0066331	25.5184	0.165941	0	0.605761	0.330722	1.42427	0.85146	0.163499	0.725	97.4964	0.305276	97.1911
LCM-9	c	1.2	29.4415	33.9528	1.06566	3.15034	0.615915	0.0464317	24.3221	0.203135	0.0109894	1.28264	0.308439	1.29894	1.20487	0.316562	0.415	97.6353	0.174744	97.4606
LCM-9	d	2.1	29.3431	35.1221	1.14501	2.14135	0.485501	0	25.0958	0.359062	0	0.736564	0.343622	1.63159	1.04858	0.217999	0.068	97.7383	0.0286328	97.7097
LCM-9	e	3.1	29.3068	34.4983	1.62494	2.28146	0.233712	0.0431152	25.1728	0.144483	0.537262	0.895306	0.336586	1.68078	1.29702	0.328158	0.199	98.5796	0.0837929	98.4958
LCM-9	f	4.1	29.4779	34.8536	1.22059	2.7326	0.525529	0.0215576	25.3015	0.247481	0	0.855938	0.249801	1.37508	0.930774	0.337434	0.379	98.5087	0.159586	98.3492
LCM-9	a	1	29.038	33.148	1.292	2.588	0.315	0.034	25.139	0.278		0.843	0.402	1.388	0.887	0.985	0.48	96.817	0.202114	96.6149
LCM-9	a	2	28.924	33.616	1.234	2.601	0.352	0.043	25.061	0.28		0.829	0.302	1.255	0.855	0.897	0.549	96.798	0.231167	96.5668
LCM-9	a	4	29.148	33.716	1.227	2.487	0.349	0.049	25.449	0.257		0.823	0.34	1.261	0.83	0.886	0.437	97.259	0.184008	97.075
LCM-9	a	5	28.916	34.027	1.195	2.486	0.378	0.043	25.219	0.256		0.773	0.315	1.244	0.796	0.835	0.439	96.922	0.18485	96.7372
LCM-9	a	6	29.064	34.173	1.215	2.416	0.378	0.032	25.155	0.136		0.732	0.26	1.173	0.707	0.773	0.534	96.748	0.224851	96.5231
LCM-9	a	7	28.869	33.449	1.209	2.374	0.335	0.031	25.564	0.254		0.716	0.343	1.23	0.741	0.697	0.544	96.356	0.229062	96.1269
LCM-9	a	8	28.961	33.532	1.195	2.353	0.332	0.041	25.565	0.221		0.706	0.355	1.241	0.743	0.765	0.512	96.522	0.215588	96.3064
LCM-9	a	9	28.901	33.947	1.17	2.354	0.384	0.04	25.468	0.305		0.678	0.342	1.177	0.733	0.671	0.44	96.61	0.185271	96.4247
LCM-9	a	10	29.182	33.956	1.167	2.332	0.379	0.031	25.278	0.244		0.637	0.352	1.26	0.8	0.813	0.404	96.835	0.170112	96.6649
LCM-9	a	11	29.317	34.209	1.153	2.322	0.372	0.049	25.761	0.319		0.651	0.325	1.245	0.699	0.752	0.496	97.67	0.208851	97.4611
LCM-9	a	12	29.452	34.606	1.123	2.361	0.398	0.047	25.68	0.211		0.683	0.369	1.21	0.685	0.803	0.479	98.107	0.201693	97.9053
LCM-9	a	13	29.582	34.476	1.19	2.413	0.372	0.056	25.604	0.202		0.653	0.349	1.221	0.746	0.712	0.443	98.019	0.186534	97.8325
LCM-9	a	14	29.682	34.583	1.17	2.446	0.412	0.043	25.713	0.246		0.634	0.27	1.296	0.699	0.722	0.441	98.357	0.185692	98.1713
LCM-9	a	15	29.555	33.582	1.242	2.431	0.414	0.035	25.733	0.179		0.674	0.262	1.221	0.769	0.685	0.508	97.29	0.213904	97.0761
LCM-9	a	16	29.554	33.891	1.221	2.437	0.4	0.04	25.783	0.205		0.635	0.334	1.183	0.711	0.837	0.427	97.658	0.179797	97.4782
LCM-9	a	17	29.625	34.045	1.217	2.48	0.386	0.031	25.825	0.132		0.629	0.275	1.251	0.706	0.739	0.53	97.871	0.223167	97.6478
LCM-9	a	18	29.595	34.942	1.169	2.238	0.385	0.033	25.67	0.268		0.477	0.462	1.458	0.671	0.752	0.455	98.575	0.191587	98.3834
LCM-9	a	19	29.449	34.795	1.206	2.195	0.351	0.024	25.681	0.281		0.505	0.443	1.334	0.669	0.656	0.408	97.997	0.171797	97.8252
LCM-9	a	20	29.323	33.774	1.193	2.311	0.37	0.019	25.661	0.136		0.502	0.428	1.371	0.625	0.656	0.534	96.903	0.224851	96.6781
LCM-9	b	1	29.648	34.219	1.169	2.255	0.414	0.035	25.714	0.195		0.583	0.425	1.337	0.62	0.632	0.565	97.811	0.237905	97.5731
LCM-9	b	2	29.75	34.74	1.202	2.318	0.363	0.03	25.738	0.289		0.489	0.371	1.305	0.68	0.692	0.528	98.495	0.222325	98.2727
LCM-9	b	3	29.561	33.876	1.256	2.787	0.365	0.035	25.31	0.209		0.718	0.309	1.165	0.792	0.78	0.537	97.7	0.226115	97.4739
LCM-9	b	4	29.509	32.774	1.339	3.126	0.352	0.053	25.165	0.255		0.742	0.307	1.329	0.924	1.147	0.608	97.63	0.256011	97.374
LCM-9	b	5	29.489	34.151	1.259	2.528	0.45	0.035	25.35	0.273		0.94	0.251	1.125	0.792	0.916	0.452	98.011	0.190324	97.8207
LCM-9	b	6	29.52	34.092	1.273	2.645	0.397	0.048	24.848	0.245		0.914	0.359	1.266	0.914	0.934	0.485	97.94	0.204219	97.7358
LCM-9	b	7	29.488	33.908	1.259	2.619	0.402	0.059	24.854	0.221		0.873	0.354	1.293	0.841	0.901	0.566	97.638	0.238326	97.3997
LCM-9	b	8	29.592	33.755	1.288	2.526	0.398	0.038	25.38	0.214		0.784	0.379	1.344	0.799	0.824	0.445	97.766	0.187376	97.5786
LCM-9	b	9	29.38	34.572	1.201	2.357	0.381	0.038	25.492	0.261		0.677	0.39	1.228	0.656	0.749	0.503	97.885	0.211798	97.6732
LCM-9	b	10	29.42	34.648	1.185	2.339	0.395	0.027	25.528	0.195		0.701	0.403	1.355	0.807	0.838	0.448	98.289	0.188639	98.1004
LCM-9	b	11	29.441	34.208	1.202	2.404	0.387	0.031	25.184	0.2		0.655	0.328	1.433	0.771	0.787	0.478	97.509	0.201271	97.3077
LCM-9	b	12	29.531	34.197	1.187	2.351	0.364	0.034	25.341	0.205		0.766	0.366	1.391	0.827	0.853	0.408	97.821	0.171797	97.6492
LCM-9	b	13	29.426	32.963	1.342	3.2	0.332	0.06	24.985	0.268		0.923	0.308	1.513	1.095	1.225	0.546	98.186	0.229904	97.9561
LCM-9	b	15	29.458	33.919	1.142	2.568	0.343	0.046	24.947	0.214		0.913	0.378	1.369	0.868	1.168	0.466	97.799	0.196219	97.6028
LCM-9	b	16	29.431	33.617	1.143	2.551	0.377	0.036	25.073	0.28		0.919	0.345	1.281	0.886	0.906	0.436	97.281	0.183587	97.0974
LCM-9	b	17	29.447	34.182	1.101	2.378	0.393	0.029	25.424	0.317		0.572	0.408	1.257	0.657	0.702	0.471	97.338	0.198324	97.1397
LCM-9	b	18	29.466	34.851	1.109	2.283	0.34	0.026	25.087	0.209		0.467	0.485	1.41	0.731	0.847	0.411	97.722	0.17306	97.5489
LCM-9	b	19	29.42	34.778	1.057	2.14	0.402	0.049	25.297	0.237		0.525	0.433	1.387	0.746	0.738	0.392	97.601	0.165059	97.4359
LCM-9	b	20	29.409	34.647	1.058	2.058	0.392	0.032	25.313	0.265		0.542	0.464	1.431	0.699	0.766	0.479	97.555	0.201693	97.3533
LCM-12	1.1		29.3217	36.0896	1.01653	1.99611	0.375747	0.0066331	25.6863	0.307563	0	0.515595	0.480837	1.9982	0.894616	0.236552	0.253	99.1789	0.106531	99.0724
LCM-12	2.1		29.3923	34.0996	1.35663	3.1272	0.538441	0.0265324	25.2581	0.320438	0.0317473	1.18104	0.329549	1.29543	0.65784	0.21568	0.619	98.4496	0.260642	98.1889
LCM-12	2.2		29.5399	34.5133	1.3094	2.9871	0.525529	0.0281907	25.461	0.307563	0	1.04897	0.438617	1.39382	0.766314	0.136829	0.069	98.5255	0.0290538	98.4965
LCM-12	3.1		29.2661	35.1705	1.21681	2.33801	0.451929	0	25.9423	0.226023	0	0.576552	0.432753	1.4559	0.807137	0.119436	0.574	98.5775	0.241694	98.3358
LCM-12	4.1		29.6811	34.5617	1.32829	2.88684	0.506161	0.04809	25.9801	0.238898	0	0.676877	0.411643	1.28138	0.620516	0.124074	0.484	98.8297	0.203798	98.6259
LCM-12	5.1		28.9046	35.0704	1.20737	2.16578	0.408028	0.00331655	25.0161	0.35334	0.224673	0.858478	0.374115	2.11532	1.05558	0.289892	0.113	98.1599	0.0475809	98.1123
LCM-12	c.1.1	1	29.505	33.064	1.043	3.634	0.627	0.089	24.554	0	0	1.645	0.358	0.911	1.19	0.38	0.43	97.43	0.18106	97.2489
LCM-12	c.1.2	2	29.447	32.897	1.093	3.601	0.542	0.077	24.953	0.768516	0.188	1.596	0.102	0.794	0.975	0.314	0.659	98.0065	0.277485	97.729
LCM-12	c.1.3	3	28.99	33.306	0.92	3.418	0.636	0.101	25.075	0.469522	0	1.591	0.026	1.068	1.063	0.354	0.345	97.3625	0.145269	97.2173
LCM-12	c.1.4	4	28.768	33.159	1.076	3.643	0.663	0.063	25.232	0.682115	0	1.618	0.144	0.978	1.152	0.394	0.611	98.1831	0.257274	97.9258
LCM-12	c.1.5	5	29.245	33.669	1.066	3.366	0.633	0.052	24.689	0.427458	0.135	1.534	0.172	1.037	1.083	0.267	0.594	97.9695	0.250116	97.7193
LCM-12	c.1.6	6	28.781	33.163	1.094	3.524	0.655	0.063	24.834	0.469522	0	1.472	0.211	1.12	0.893	0.332	0.567	97.1785	0.238747	96.9398
LCM-12	c.1.7	7	29.092	33.196	1.044	3.5	0.609	0.052	25.253	0.170529	0.018	1.543	0.205	0.994	0.931	0.241	0.609	97.4575	0.256432	97.2011
LCM-12	c.1.8	8	29.289	33.604	1.012	3.574	0.567	0.053	25.364	0	0.063	1.592	0.206	0.986	1.137	0.3	0.412	98.159	0.173481	97.9855
LCM-12	c.1.9	9	29.061	34	1.13	3.536	0.576	0.1	25.032	0	0	1.493	0.157	0.971	1.138	0.373	0.554	98.121	0.233273	97.8877
LCM-12	c.1.10	10	29.128	33.705	1.154	3.504	0.644	0.07	25.038	0	0	1.503	0.238	1.038	1.129	0.365	0.56	98.076	0.235799	97.8402
LCM-12	c.1.11	11	29.246	32.962	1.131	3.603	0.636	0.053	25.523	0.512723	0.126	1.522	0.132	1.002	0.997	0.267	0.459	98.1717	0.193271	97.9785
LCM-12	c.1.12	12	29.308	33.655	1.076	3.723	0.531	0.105	24.965	0.255793	0	1.526	0.287	1.015	1.132	0.372	0.591	98.5418	0.248852	98.2929
LCM-12	c.1.13	13	28.89	33.284	1.002	3.76	0.655	0.077	25.195	0.128465	0.045	1.495	0.196	1.016	1.075	0.31	0.337	97.4655	0.141901	97.3236
LCM-12	c.1.14	14	29.663	31.917	1.042	3.392	0.672	0.054	24.186	0.341057	0	1.634	0.225	0.925	1.055	0.371	0.446	95.9231	0.187797	95.7353
LCM-12	c.1.15	15	28.993	33.089	1.081	3.446	0.545	0.104	25.021	0	0.171	1.449	0.222	0.912	1.183	0.296	0.546	97.058	0.229904	96.8281
LCM-12	c.1.16	16	28.986	33.52	1.081	3.569	0.631	0.077	25.241	0	0.072	1.594	0.12	0.705	0.977	0.369	0.57	97.512	0.24001	97.272
LCM-12	c.1.17	17	28.945	33.648	1.097	3.627	0.583	0.066	24.948	0	0.081	1.675	0.253	1.23	1.107	0.391	0.524	98.175	0.220641	97.9544
LCM-12	c.1.18	18	28.993	33.1	1.075	3.501	0.62	0.087	24.952	0	0	1.669	0.149	1.091	0.943	0.34	0.46	96.98	0.193692	96.7863
LCM-12	c.1.19	19	29.32	33.454	1.026	3.55	0.636	0.068	25.111	0.0432006	0.207	1.572	0.127	0.986	1.12	0.395	0.599	98.2142	0.252221	97.962
LCM-12	c.1.20	20	29.206	33.445	1.022	3.441	0.561	0.051	25.027	0.342194	0.179	1.561	0.182	1.282	1.161	0.361	0.61	98.4312	0.256853	98.1743
LCM-12	c.1.21	21	29.121	33.227	1.086	3.643	0.6	0.075	24.965	0.213729	0.072	1.536	0.385	1.068	0.897	0.34	0.659	97.8877	0.277485	97.6102
LCM-12	c.1.22	22	29.08	32.813	1.021	3.521	0.542	0.095	25.177	0.128465	0.162	1.573	0.221	1.031	1.162	0.318	0.624	97.4685	0.262748	97.2057
LCM-12	c.1.23	23	29.184	32.706	1.023	3.333	0.529	0.095	24.828	0.25693	0.063	1.58	0.252	1.039	1.047	0.318	0.478	96.7319	0.201271	96.5307
LCM-12	c.1.24	24	28.804	33.802	0.934	2.982	0.486	0.035	24.647	0.981108	0	1.704	0.272	1.414	1.292	0.295	0.356	98.0041	0.149901	97.8542
LCM-12	c.1.25	25	28.55	33.701	0.913	3.059	0.546	0.086	24.259	0.512723	0.215	1.785	0.27	1.242	1.386	0.401	0.235	97.1607	0.0989514	97.0618
LCM-12	c.1.26	26	28.631	33.264	0.848	3.152	0.535	0.076	24.238	0.896981	0.116	1.808	0.281	1.338	1.323	0.524	0.32	97.351	0.134742	97.2162
LCM-12	c.1.27	27	28.801	34.464	0.923	3.008	0.592	0.042	25.024	0.298994	0.036	1.654	0.25	1.126	1.187	0.387	0.265	98.058	0.111584	97.9464
LCM-12	c.1.28	28	28.822	35.086	0.809	2.854	0.65	0.073	24.731	0.255793	0.072	1.553	0.334	0.986	1.146	0.409	0.347	98.1278	0.146111	97.9817
LCM-12	c.1.29	29	28.375	34.655	0.94	2.99	0.523	0.087	24.669	0.978834	0.027	1.519	0.201	1.192	1.095	0.365	0.264	97.8808	0.111162	97.7697
LCM-12	c.1 30	30	28.781	34.19	0.962	2.681	0.522	0.042	25.102	0	0	1.304	0.333	1.226	0.9	0.194	0.342	96.579	0.144006	96.435
LCM-12	b.1.1	1	29.75	34.942	1.209	2.183	0.399	0.004	26.957	0.0420637	0	0.602	0.382	1.112	0.641	0.173	0.505	98.9011	0.21264	98.6884
LCM-12	b.1.2	2	29.595	34.974	1.279	2.197	0.41	0.029	26.884	0.59344	0.036	0.476	0.475	1.141	0.607	0.055	0.312	99.0634	0.131374	98.9321
LCM-12	b.1.3	3	30.128	34.884	1.377	2.302	0.38	0.019	26.781	0.212592	0	0.612	0.387	1.224	0.624	0.136	0.221	99.2876	0.0930565	99.1945
LCM-12	b.1.4	4	30.122	35.31	1.314	2.253	0.39	0.054	26.482	0.33992	0.036	0.608	0.307	1.305	0.661	0.151	0.435	99.7679	0.183165	99.5848
LCM-12	b.1.5	5	29.513	34.566	1.155	2.935	0.456	0.058	25.738	0	0	1.18	0.218	1.219	0.85	0.333	0.328	98.549	0.138111	98.4109
LCM-12	b.1.6	6	29.308	34.86	1.073	2.72	0.481	0.062	25.753	0	0	1.112	0.381	1.086	0.971	0.18	0.329	98.316	0.138532	98.1775
LCM-12	b.1.7	7	29.772	34.32	1.161	2.887	0.447	0.009	25.374	0.0852643	0.207	1.16	0.35	0.981	1.02	0.3	0.584	98.6573	0.245905	98.4114
LCM-12	b.1.8	8	29.419	34.281	1.193	3.005	0.428	0.081	25.645	0	0.117	1.187	0.358	1.092	1.094	0.264	0.455	98.619	0.191587	98.4274
LCM-12	b.1.9	9	29.427	34.917	1.116	2.986	0.497	0.047	25.724	0.128465	0	1.272	0.281	1.174	0.995	0.201	0.532	99.2975	0.224009	99.0735
LCM-12	b.1.10	10	29.148	34.412	1.174	2.826	0.47	0.044	26.041	0.212592	0	1.226	0.265	0.856	1.042	0.154	0.363	98.2336	0.152848	98.0807
LCM-12	b.1.11	11	29.12	34.472	1.016	2.886	0.494	0.043	25.555	0	0	1.371	0.335	0.989	0.975	0.253	0.281	97.79	0.118321	97.6717
LCM-12	b.1.12	12	29.096	34.434	1.11	2.665	0.505	0.039	25.012	0.170529	0	1.19	0.382	1.159	1.028	0.231	0.335	97.3565	0.141058	97.2155
LCM-12	b.1.13	13	29.405	35.057	1.112	2.519	0.398	0.035	25.961	0.341057	0.045	0.986	0.298	1.302	0.806	0.22	0.425	98.9101	0.178955	98.7311
LCM-12	b.1.14	14	29.518	35.604	1.237	2.185	0.343	0.015	27.088	0.63664	0	0.558	0.307	1.283	0.562	0.07	0.312	99.7186	0.131374	99.5873
LCM-12	b.1.15	15	29.642	35.136	1.117	2.153	0.332	0	26.708	0.509312	0.117	0.527	0.475	1.223	0.512	0.11	0.284	98.8453	0.119584	98.7257
LCM-12	b.1.16	16	29.689	35.171	1.131	2.233	0.362	0	26.973	0.170529	0.198	0.61	0.266	1.528	0.644	0.213	0.399	99.5875	0.168007	99.4195
LCM-12	b.1.17	17	29.672	35.779	1.096	2.172	0.329	0.019	26.762	0.509312	0	0.607	0.447	1.587	0.582	0.106	0.345	100.012	0.145269	99.867
LCM-12	b.1.18	18	29.359	35.302	1.098	2.029	0.352	0.048	26.153	0.212592	0	0.577	0.395	1.313	0.687	0.081	0.436	98.0426	0.183587	97.859
LCM-12	b.1.19	19	29.846	35.295	1.064	2.056	0.263	0.04	26.729	0	0	0.581	0.635	1.373	0.562	0.118	0.208	98.77	0.0875826	98.6824
LCM-12	b.1.20	20	29.219	34.972	1.204	2.378	0.412	0.054	25.701	0.468385	0.261	1.044	0.407	1.25	0.594	0.099	0.712	98.7754	0.299802	98.4756
LCM-12	a.1.1	1	29.681	35.957	1.147	1.671	0.238	0.024	26.759	0.891296	0.09	0.595	0.358	1.134	0.642	0.103	0.188	99.4783	0.0791612	99.3991
LCM-12	a.1.2	2	29.293	36.29	1.108	1.585	0.257	0.055	26.674	1.56545	0.009	0.493	0.429	1.089	0.512	0.129	0.466	99.9545	0.196219	99.7582
LCM-12	a.1.3	3	29.297	35.525	1.188	1.718	0.233	0.021	26.529	0.891296	0.108	0.646	0.333	1.246	0.604	0.059	0.195	98.5933	0.0821087	98.5112
LCM-12	a.1.4	4	29.307	35.871	1.065	1.459	0.219	0.004	26.773	0.381984	0.325	0.484	0.275	1.232	0.592	0.154	0.244	98.386	0.102741	98.2832
LCM-12	a.1.5	5	29.531	35.581	1.051	1.671	0.236	0.018	27.035	0.594576	0	0.651	0.198	1.032	0.522	0.129	0.119	98.3686	0.0501073	98.3185
LCM-12	a.1.6	6	29.075	35.385	1.12	1.65	0.205	0.025	26.802	0.763968	0	0.618	0.404	1.075	0.812	0.011	0.403	98.349	0.169691	98.1793
LCM-12	a.1.7	7	29.354	35.736	1.177	1.67	0.208	0.018	26.693	0.806032	0	0.589	0.118	0.867	0.626	0.254	0.14	98.256	0.0589498	98.1971
LCM-12	a.1.8	8	29.455	36.44	1.103	1.744	0.216	0.014	27.404	0.974287	0.045	0.677	0.083	1.106	0.542	0.081	0.42	100.304	0.176849	100.127
LCM-12	a.1.9	9	29.389	35.339	1.227	1.759	0.239	0.039	27.535	1.01749	0.117	0.502	0.239	0.808	0.434	0.07	0.281	98.9955	0.118321	98.8772
LCM-12	a.1.10	10	29.819	35.04	1.261	1.893	0.336	0.05	27.419	0	0	0.564	0.231	0.995	0.505	0.133	0.378	98.624	0.159164	98.4648
LCM-12	a.1.11	11	29.194	35.593	1.3	1.692	0.266	0.009	26.997	0.551376	0	0.665	0.345	0.994	0.513	0.037	0.336	98.4924	0.14148	98.3509
LCM-12	a.1.12	12	29.232	35.697	1.23	1.904	0.266	0.023	27.221	0.720768	0	0.741	0.211	0.979	0.405	0.114	0.175	98.9188	0.0736872	98.8451
LCM-12	a.1.13	13	29.691	35.569	1.148	1.898	0.302	0	26.853	0.975424	0.144	0.654	0.278	0.732	0.5	0.033	0.231	99.0084	0.0972672	98.9112
LCM-12	a.1.14	14	29.474	35.638	1.119	2.134	0.346	0	26.238	1.39947	0.153	0.736	0.349	0.836	0.437	0.029	0.07	98.9585	0.0294749	98.929
LCM-12	a.1.15	15	29.091	36.473	1.198	1.81	0.305	0	26.678	1.05841	0	0.608	0.108	0.993	0.576	0.018	0.127	99.0434	0.0534759	98.9899
LCM-12	a.2.1	1	29.677	35.859	1.163	1.885	0.275	0.04	26.687	0.467248	0	0.66	0	0.868	0.426	0.111	0.296	98.4142	0.124637	98.2896
LCM-12	a.2.2	2	29.703	35.531	1.239	1.71	0.363	0	27.047	1.01862	0	0.597	0.263	0.904	0.492	0.228	0.238	99.3336	0.100215	99.2334
LCM-12	a.2.3	3	29.367	36.041	1.286	1.809	0.38	0.046	27.053	0.848096	0	0.653	0.29	0.755	0.401	0.085	0.393	99.4071	0.165481	99.2416
LCM-12	a.2.4	4	29.201	35.392	1.348	1.908	0.311	0.013	27.073	0.63664	0.226	0.596	0.118	0.688	0.367	0.103	0.218	98.1986	0.0917933	98.1068
LCM-12	a.2.5	5	29.3	35.535	1.251	1.949	0.402	0.016	26.931	0.594576	0.045	0.608	0.275	0.83	0.509	0.066	0.392	98.7036	0.165059	98.5385
LCM-12	a.2.6	6	29.166	35.43	1.335	1.726	0.344	0.048	27.395	0.720768	0.217	0.603	0.177	0.778	0.451	0.088	0.512	98.9908	0.215588	98.7752
LCM-12	a.2.7	7	29.524	35.624	1.223	1.754	0.333	0.013	27.097	0.552513	0.271	0.73	0.213	1.158	0.471	0.143	0.209	99.3155	0.0880036	99.2275
LCM-12	a.2.8	8	29.048	35.804	1.306	1.866	0.316	0.041	27.061	0.806032	0	0.658	0.249	0.859	0.571	0.085	0.573	99.243	0.241273	99.0018
LCM-12	a.2.9	9	29.09	35.686	1.366	1.904	0.25	0.018	26.864	0.891296	0.018	0.69	0.064	1.061	0.459	0.107	0.35	98.8183	0.147374	98.6709
LCM-12	a.2.10	10	28.956	35.605	1.291	1.95	0.294	0.01	27.221	0.890159	0	0.629	0.216	0.957	0.342	0	0.302	98.6632	0.127163	98.536
LCM-12	a.2.11	11	29.024	36.21	1.355	1.98	0.319	0.01	27.526	0.677567	0.072	0.654	0.268	1.001	0.496	0.015	0.406	100.014	0.170954	99.8426
LCM-12	a.2.12	12	29.532	36.018	1.315	1.979	0.236	0.029	27.046	0.594576	0.045	0.607	0.2	0.972	0.43	0.059	0.294	99.3566	0.123795	99.2328
LCM-12	a.2.13	13	29.172	36.056	1.235	1.756	0.255	0.034	26.795	0	0	0.619	0.381	0.807	0.618	0.221	0.316	98.265	0.133058	98.1319
LCM-12	a.2.14	14	28.996	36.094	1.062	1.969	0.302	0.049	26.539	1.05955	0	0.631	0.266	1.379	0.524	0.11	0.091	99.0716	0.0383174	99.0332
LCM-12	a.2.15	15	28.934	35.438	1.22	1.774	0.275	0.01	26.916	0.381984	0.172	0.647	0.249	0.987	0.43	0.118	0.315	97.867	0.132637	97.7343
LCM-12	a	1	29.174	32.769	1.394	3.016	0.451	0.047	24.227	0.295		1.248	0.323	1.174	0.616	0.691	0.68	96.105	0.286328	95.8187
LCM-12	a	2	29.06	32.594	1.351	3.053	0.479	0.059	24.702	0.365		1.271	0.358	1.249	0.651	0.651	0.674	96.517	0.283801	96.2332
LCM-12	a	3	29.197	32.024	1.372	3.084	0.447	0.038	24.731	0.231		1.222	0.268	1.241	0.641	0.617	0.619	95.732	0.260642	95.4714
LCM-12	a	4	29.171	32.514	1.331	2.909	0.5	0.033	24.527	0.267		1.257	0.335	1.304	0.671	0.663	0.571	96.053	0.240431	95.8126
LCM-12	a	5	29.224	33.285	1.281	2.797	0.427	0.051	24.79	0.363		1.235	0.325	1.282	0.723	0.724	0.609	97.116	0.256432	96.8596
LCM-12	a	6	29.405	31.668	1.352	3.013	0.463	0.056	24.64	0.31		1.272	0.275	1.284	0.723	0.704	0.591	95.756	0.248852	95.5071
LCM-12	a	7	29.354	32.453	1.324	3.138	0.471	0.039	24.573	0.276		1.211	0.285	1.213	0.657	0.709	0.722	96.425	0.304013	96.121
LCM-12	a	8	29.147	32.691	1.314	3.169	0.425	0.051	24.762	0.29		1.297	0.305	1.257	0.748	0.761	0.649	96.866	0.273274	96.5927
LCM-12	a	9	29.207	33.013	1.354	3.157	0.457	0.05	24.558	0.281		1.345	0.333	1.211	0.734	0.801	0.614	97.115	0.258537	96.8565
LCM-12	a	10	29.221	32.718	1.374	3.186	0.42	0.045	24.593	0.21		1.319	0.281	1.19	0.771	0.821	0.641	96.79	0.269906	96.5201
LCM-12	a	11	29.202	32.163	1.303	3.144	0.465	0.06	24.748	0.283		1.29	0.248	1.234	0.688	0.791	0.612	96.231	0.257695	95.9733
LCM-12	a	12	28.946	33.114	1.157	2.543	0.426	0.042	24.125	0.637		1.412	0.289	1.271	0.782	0.884	0.428	96.056	0.180218	95.8758
LCM-12	a	13	28.869	33.521	1.122	2.623	0.427	0.052	24.192	0.71		1.477	0.244	1.315	0.775	0.814	0.368	96.509	0.154954	96.354
LCM-12	a	14	29.355	32.294	1.32	3.225	0.464	0.05	24.573	0.35		1.333	0.248	1.266	0.698	0.765	0.576	96.517	0.242536	96.2745
LCM-12	a	15	29.297	32.578	1.402	3.197	0.484	0.048	24.837	0.203		1.295	0.353	1.238	0.678	0.748	0.585	96.943	0.246326	96.6967
LCM-12	a	16	29.328	33.214	1.27	3.097	0.432	0.058	24.466	0.356		1.287	0.237	1.274	0.675	0.669	0.561	96.924	0.23622	96.6878
LCM-12	a	17	29.113	33.156	1.336	2.886	0.484	0.056	24.2	0.271		1.249	0.317	1.254	0.654	0.676	0.49	96.142	0.206324	95.9357
LCM-12	a	18	29.295	32.27	1.353	3.124	0.436	0.062	24.251	0.267		1.255	0.317	1.218	0.729	0.678	0.544	95.799	0.229062	95.5699
LCM-12	a	19	29.269	32.652	1.353	3.096	0.443	0.063	24.554	0.238		1.271	0.356	1.28	0.658	0.656	0.609	96.498	0.256432	96.2416
LCM-12	a	20	29.343	33.281	1.356	2.715	0.409	0.053	24.525	0.323		1.099	0.342	1.272	0.667	0.709	0.626	96.72	0.26359	96.4564
LCM-13	a	1	29.521	33.741	1.339	2.268	0.345	0.023	25.201	0.243		0.913	0.397	1.352	0.772	0.789	0.405	97.309	0.170533	97.1385
LCM-13	a	2	29.367	34.225	1.284	2.252	0.354	0.015	25.178	0.311		0.919	0.381	1.365	0.828	0.896	0.377	97.752	0.158743	97.5933
LCM-13	a	3	29.38	34.321	1.241	2.179	0.341	0.021	24.76	0.255		0.927	0.411	1.353	0.894	0.894	0.316	97.293	0.133058	97.1599
LCM-13	a	4	29.502	34.462	1.312	2.321	0.35	0.025	24.968	0.245		0.944	0.308	1.406	0.817	0.914	0.46	98.034	0.193692	97.8403
LCM-13	a	5	29.293	33.336	1.247	2.334	0.38	0.033	24.857	0.297		1.013	0.345	1.315	0.952	1.025	0.324	96.751	0.136427	96.6146
LCM-13	a	6	28.972	33.674	1.15	2.073	0.344	0.009	24.53	0.41		1.135	0.416	1.581	0.989	1.03	0.253	96.566	0.106531	96.4595
LCM-13	a	7	29.108	33.739	1.235	2.34	0.376	0.023	24.526	0.361		1.073	0.352	1.467	0.918	1.035	0.336	96.889	0.14148	96.7475
LCM-13	a	8	29.298	33.598	1.339	2.515	0.385	0.035	24.925	0.236		1.009	0.367	1.393	0.861	0.992	0.394	97.347	0.165902	97.1811
LCM-13	a	9	29.327	33.1	1.252	2.371	0.295	0.02	25.148	0.231		0.976	0.325	1.416	0.902	0.95	0.392	96.705	0.165059	96.5399
LCM-13	a	10	29.261	33.649	1.371	2.415	0.323	0.028	25.038	0.182		0.956	0.398	1.438	0.808	0.965	0.471	97.303	0.198324	97.1047
LCM-13	b	1	29.394	33.434	1.267	2.483	0.335	0.029	24.981	0.167		0.699	0.451	1.356	0.731	0.825	0.516	96.668	0.217272	96.4507
LCM-13	b	2	29.74	34.194	1.256	2.374	0.348	0.034	25.081	0.184		0.61	0.365	1.379	0.583	0.686	0.461	97.295	0.194113	97.1009
LCM-13	b	3	29.591	32.87	1.323	2.468	0.339	0.031	24.839	0.21		0.725	0.434	1.609	0.751	0.844	0.52	96.554	0.218956	96.335
LCM-13	b	4	29.366	33.335	1.344	2.538	0.29	0.057	24.808	0.241		0.933	0.294	1.37	0.959	1.016	0.438	96.989	0.184429	96.8046
LCM-13	b	5	29.27	33.372	1.354	2.591	0.297	0.044	24.462	0.156		1.049	0.351	1.419	1.036	1.05	0.507	96.958	0.213482	96.7445
LCM-13	b	6	29.183	33.076	1.396	2.616	0.303	0.03	24.271	0.166		1.071	0.32	1.487	1.063	1.185	0.483	96.65	0.203377	96.4466
LCM-13	b	7	29.215	32.11	1.446	2.702	0.292	0.051	24.285	0.156		1.187	0.299	1.441	1.243	1.255	0.469	96.151	0.197482	95.9535
LCM-13	b	8	29.091	32.303	1.517	2.951	0.298	0.051	24.357	0.171		1.269	0.38	1.428	1.351	1.434	0.443	97.044	0.186534	96.8575
LCM-13	b	9	28.752	33.299	1.222	2.429	0.302	0.058	23.96	0.21		1.284	0.366	1.527	1.349	1.371	0.273	96.402	0.114952	96.287
LCM-13	b	10	28.993	33.058	1.205	2.343	0.269	0.048	24.117	0.203		1.198	0.29	1.473	1.264	1.392	0.303	96.156	0.127584	96.0284
LCM-13	b	11	29.449	32.602	1.402	2.602	0.276	0.05	24.504	0.22		1.131	0.322	1.371	1.138	1.206	0.438	96.711	0.184429	96.5266
LCM-13	b	12	29.386	33.014	1.408	2.608	0.281	0.065	24.677	0.161		1.044	0.328	1.418	0.994	1.104	0.462	96.95	0.194534	96.7555
LCM-13	b	13	29.655	33.136	1.335	2.468	0.353	0.034	24.866	0.111		0.866	0.344	1.606	0.881	1.035	0.491	97.181	0.206745	96.9743
LCM-13	b	14	29.824	32.591	1.26	2.396	0.341	0.019	25.166	0.208		0.678	0.386	1.482	0.656	0.782	0.502	96.291	0.211377	96.0796
LCM-13	b	15	29.794	33.8	1.237	2.358	0.366	0.023	25.103	0.243		0.704	0.403	1.384	0.648	0.634	0.52	97.217	0.218956	96.998
LCM-13	c	1.1	28.6585	34.9636	1.24138	2.29559	0.339593	0	24.9041	0.291827	0	0.976582	0.474973	1.96423	1.54079	0.416285	0.164	98.2316	0.0690555	98.1625
LCM-13	d	2.1	29.142	35.1722	1.32451	2.25832	0.395115	0.0215576	25.2049	0.29898	0.181936	0.867368	0.412816	1.78268	1.33551	0.400051	0.246	99.044	0.103583	98.9404
LCM-13	e	3.1	29.1613	35.9328	1.17714	1.96141	0.240168	0	25.3449	0.337604	0	0.8153	0.41047	1.79205	1.12673	0.301488	0.276	98.8773	0.116215	98.7611
LCM-13	f	4.1	28.958	34.7335	1.2376	2.39971	0.244042	0.0116079	24.6691	0.257494	0	1.0477	0.4609	1.98883	1.61194	0.405849	0.098	98.1242	0.0412649	98.083
LCM-13	f	4.2	29.2212	35.3006	1.28106	2.17606	0.312477	0.0132662	24.9349	0.226023	0.0647156	0.849589	0.469109	1.87873	1.33434	0.324679	0.213	98.5997	0.0896879	98.51
LCM-15	a	1	29.088	33.124	1.402	2.587	0.213	0.028	23.876	0.137		1.061	0.311	1.466	1.327	1.475	0.38	96.475	0.160007	96.315
LCM-15	a	2	29.155	33.895	1.24	1.907	0.203	0.008	24.211	0.255		0.92	0.447	1.731	1.209	1.426	0.243	96.85	0.10232	96.7477
LCM-15	a	3	29.208	33.452	1.189	1.765	0.196	0.023	24.474	0.269		0.895	0.397	1.693	1.269	1.315	0.194	96.339	0.0816876	96.2573
LCM-15	a	4	29.194	34.118	1.213	1.854	0.21	0.029	24.233	0.283		0.92	0.449	1.862	1.309	1.372	0.214	97.26	0.090109	97.1699
LCM-15	a	5	29.355	34.437	1.201	1.855	0.265	0.018	24.05	0.238		0.917	0.501	1.733	1.247	1.325	0.276	97.418	0.116215	97.3018
LCM-15	a	6	29.32	33.316	1.271	2.247	0.21	0.015	24.728	0.227		0.936	0.221	1.493	1.084	1.22	0.358	96.646	0.150743	96.4953
LCM-15	a	7	29.394	33.77	1.265	2.312	0.286	0.019	25.06	0		0.937	0.333	1.366	1.052	1.14	0.312	97.246	0.131374	97.1146
LCM-15	a	8	29.337	34.109	1.236	2.185	0.187	0.034	24.575	0.165		0.999	0.33	1.397	1.309	1.337	0.269	97.469	0.113268	97.3557
LCM-15	a	9	29.215	34.137	1.194	2.069	0.253	0.028	24.228	0.172		1.076	0.337	1.522	1.384	1.405	0.249	97.269	0.104846	97.1642
LCM-15	b	1	29.175	34.031	1.331	2.427	0.248	0.034	24.572	0.092		1.076	0.28	1.497	1.375	1.525	0.423	98.086	0.178113	97.9079
LCM-15	b	2	29.236	34.191	1.335	2.358	0.324	0.032	24.664	0.184		1.079	0.305	1.52	1.444	1.447	0.248	98.367	0.104425	98.2626
LCM-15	b	3	29.177	34.107	1.35	2.529	0.314	0.031	24.602	0.203		1.145	0.32	1.351	1.165	1.202	0.339	97.835	0.142743	97.6923
LCM-15	b	4	29.454	33.764	1.367	2.521	0.271	0.019	24.674	0.25		1.096	0.309	1.436	1.19	1.321	0.342	98.014	0.144006	97.87
LCM-15	b	5	29.26	33.471	1.34	2.585	0.325	0.017	24.691	0.222		1.166	0.319	1.449	1.226	1.117	0.32	97.508	0.134742	97.3733
LCM-15	b	6	29.455	33.957	1.372	2.61	0.286	0.045	24.59	0.161		1.159	0.372	1.382	1.176	1.201	0.408	98.174	0.171797	98.0022
LCM-15	b	7	29.263	33.346	1.361	2.646	0.323	0.027	24.674	0.241		1.158	0.297	1.29	1.15	1.176	0.515	97.467	0.216851	97.2501
LCM-15	b	8	29.558	33.631	1.269	2.498	0.268	0.025	24.335	0.22		1.213	0.41	1.613	1.282	1.422	0.297	98.041	0.125058	97.9159
LCM-15	b	9	29.317	34.096	1.294	2.337	0.255	0.032	24.049	0.158		1.08	0.373	1.567	1.361	1.461	0.292	97.672	0.122952	97.549
LCM-15	c	1.1	29.3281	34.6484	1.28484	2.44341	0.360252	0.0265324	24.5389	0.230314		1.03119	0.280293	1.85647	1.30752	0.384977	0.079	97.8003	0.0332645	97.767
LCM-15	c	1.2	29.5506	34.6184	1.39253	2.47168	0.369291	0.0232159	24.9741	0.228884		0.977852	0.378806	1.41256	1.16872	0.302647	0.171	98.0403	0.072003	97.9683
LCM-15	d	3.1	28.9987	34.3348	1.25649	2.39199	0.377038	0.0248741	24.5837	0.236037	0.428588	0.974043	0.506638	1.85296	1.61427	0.434838	0.292	98.307	0.122952	98.184
LCM-15	d	4.1	29.2918	33.7793	1.49457	2.71204	0.307312	0.0132662	25.0818	0.205996	0.161179	1.25597	0.399916	1.44653	1.3775	0.381498	0.487	98.3957	0.205061	98.1906
LCM-17	c	c.1	30.52	36.866	1.273	0.931	0.057	0.013	28.21	0.007		0.133	0	0.146	0.121	0.074	0.511	98.862	0.215167	98.6468
LCM-17	c	c.2	30.361	37.209	1.161	0.927	0.063	0	28.365	0		0.086	0.038	0.114	0.06	0.026	0.449	98.859	0.18906	98.6699
LCM-17	c	c.3	30.403	37.243	1.268	0.923	0.111	0.025	28.109	0.009		0.18	0.035	0.119	0.092	0.129	0.467	99.113	0.19664	98.9164
LCM-17	d	d.1	30.226	36.782	1.095	0.92	0.054	0.011	27.989	0.049		0.081	0.056	0.04	0.043	0.058	0.394	97.798	0.165902	97.6321
LCM-17	d	d.3	30.118	36.787	1.128	0.932	0.062	0.005	27.862	0.051		0.122	0.006	0.042	0.034	0.047	0.481	97.677	0.202535	97.4745
LCM-19	e	e.1	29.672	35.256	1.401	1.637	0.085	0.022	26.619	0.178		0.189	0.256	0.889	0.562	0.625	0.42	97.811	0.176849	97.6342
LCM-19	e	e.2	30.157	35.638	1.464	1.644	0.099	0.011	27.322	0.121		0.043	0.103	0.192	0.057	0.03	0.791	97.672	0.333066	97.3389
LCM-20	a	1	30.4	35.508	1.495	1.498	0.092	0.024	27.273	0.145		0.165	0.074	0.355	0.294	0.356	0.523	98.202	0.22022	97.9818
LCM-20	a	2	30.095	35.236	1.551	1.397	0.078	0	27.028	0.091		0.198	0.157	0.607	0.508	0.629	0.372	97.947	0.156638	97.7904
LCM-20	a	3	30.189	35.329	1.529	1.485	0.094	0.013	27.085	0.112		0.189	0.117	0.572	0.521	0.6	0.395	98.23	0.166323	98.0637
LCM-20	a	4	30.625	36.062	1.568	1.516	0.083	0.002	27.443	0.189		0.177	0.078	0.459	0.525	0.437	0.375	99.539	0.157901	99.3811
LCM-20	a	5	30.51	36.043	1.557	1.61	0.102	0.017	27.375	0.101		0.145	0.092	0.319	0.246	0.334	0.459	98.91	0.193271	98.7167
LCM-20	a	6	30.523	35.546	1.485	1.353	0.089	0	27.434	0.089		0.145	0.134	0.328	0.235	0.26	0.441	98.062	0.185692	97.8763
LCM-20	a	7	30.379	36.195	1.448	1.267	0.071	0.002	27.553	0.084		0.168	0.022	0.146	0.255	0.339	0.496	98.425	0.208851	98.2161
LCM-20	a	8	30.617	36.277	1.551	1.363	0.091	0.009	27.445	0.084		0.154	0.092	0.268	0.211	0.273	0.55	98.985	0.231589	98.7534
LCM-20	a	9	30.6756	35.92	1.523	1.529	0.129	0.002	29.31	0.115		0.16	0.055	0.293	0.22	0.213	0.498	100.643	0.209693	100.433
LCM-20	a	10	30.404	35.583	1.603	1.545	0.099	0	27.37	0.077		0.159	0.08	0.339	0.256	0.21	0.536	98.261	0.225694	98.0353
LCM-20	a	11	30.324	35.012	1.591	1.609	0.109	0.001	27.24	0.08		0.11	0.098	0.36	0.292	0.323	0.483	97.632	0.203377	97.4286
LCM-20	a	12	30.335	35.618	1.636	1.481	0.089	0.002	27.415	0.07		0.108	0.065	0.339	0.311	0.25	0.573	98.292	0.241273	98.0507
LCM-20	a	13	30.289	35.763	1.554	1.552	0.092	0	27.263	0.164		0.145	0.116	0.36	0.346	0.289	0.491	98.424	0.206745	98.2173
LCM-20	a	14	30.427	35.915	1.635	1.468	0.098	0.002	27.615	0.082		0.123	0.091	0.287	0.262	0.325	0.611	98.941	0.257274	98.6837
LCM-20	a	15	30.245	35.369	1.567	1.549	0.064	0.004	27.691	0.089		0.136	0.053	0.397	0.294	0.366	0.536	98.36	0.225694	98.1343
LCM-20	a	16	30.237	35.921	1.357	1.368	0.077	0.003	27.392	0.173		0.133	0.086	0.388	0.312	0.294	0.464	98.205	0.195376	98.0096
LCM-20	a	17	30.52	35.877	1.561	1.569	0.116	0.013	27.333	0.238		0.132	0.073	0.302	0.222	0.264	0.563	98.783	0.237062	98.5459
LCM-20	a	18	30.54	35.228	1.454	1.389	0.128	0.011	27.547	0.122		0.158	0.089	0.376	0.273	0.295	0.485	98.095	0.204219	97.8908
LCM-20	a	19	30.324	35.479	1.517	1.412	0.094	0.012	27.37	0.108		0.151	0.127	0.315	0.361	0.231	0.437	97.938	0.184008	97.754
LCM-20	a	20	30.459	36.208	1.439	1.353	0.062	0.016	27.22	0.234		0.162	0.073	0.32	0.329	0.374	0.454	98.703	0.191166	98.5118
LCM-20	b	1	29.924	34.563	1.327	1.437	0.242	0.001	26.949	0.172		0.186	0.271	0.722	0.286	0.29	0.442	96.812	0.186113	96.6259
LCM-20	b	2	29.906	35.444	1.292	1.396	0.296	0.017	26.943	0.171		0.152	0.345	0.73	0.284	0.267	0.474	97.717	0.199587	97.5174
LCM-20	b	3	29.912	35.589	1.293	1.392	0.22	0.021	26.825	0.171		0.158	0.337	0.727	0.277	0.309	0.568	97.799	0.239168	97.5598
LCM-20	b	4	29.972	35.68	1.299	1.383	0.281	0.018	26.655	0.145		0.134	0.268	0.689	0.322	0.303	0.49	97.639	0.206324	97.4327
LCM-20	b	5	29.656	35.122	1.33	1.419	0.246	0.027	26.761	0.145		0.178	0.308	0.684	0.329	0.341	0.488	97.034	0.205482	96.8285
LCM-20	b	6	29.497	34.71	1.267	1.412	0.287	0.032	26.554	0.183		0.177	0.241	0.773	0.298	0.338	0.536	96.305	0.225694	96.0793
LCM-20	b	7	29.548	35.522	1.301	1.391	0.251	0.01	26.659	0.166		0.193	0.291	0.703	0.26	0.292	0.48	97.067	0.202114	96.8649
LCM-20	b	8	30.209	36.211	1.335	1.382	0.256	0.011	26.359	0.273		0.17	0.225	0.624	0.206	0.241	0.558	98.06	0.234957	97.825
LCM-20	b	9	29.683	35.79	1.293	1.396	0.253	0.003	26.707	0.215		0.191	0.34	0.678	0.333	0.334	0.536	97.752	0.225694	97.5263
LCM-20	b	10	29.968	35.668	1.296	1.476	0.263	0.018	26.731	0.217		0.186	0.239	0.782	0.251	0.319	0.505	97.919	0.21264	97.7064
LCM-20	b	11	30.023	35.991	1.372	1.435	0.262	0.01	26.603	0.228		0.208	0.271	0.655	0.257	0.312	0.529	98.156	0.222746	97.9333
LCM-20	b	12	29.834	35.675	1.338	1.442	0.247	0.013	26.588	0.173		0.202	0.284	0.789	0.237	0.263	0.503	97.588	0.211798	97.3762
LCM-20	b	13	29.806	34.823	1.384	1.376	0.23	0.019	26.831	0.224		0.151	0.287	0.677	0.248	0.344	0.512	96.912	0.215588	96.6964
LCM-20	b	14	30.103	34.813	1.353	1.406	0.249	0.021	27.059	0.195		0.175	0.246	0.737	0.266	0.277	0.447	97.347	0.188218	97.1588
LCM-20	b	15	30.061	35.276	1.345	1.4	0.249	0.007	27.08	0.122		0.157	0.296	0.61	0.221	0.333	0.506	97.663	0.213061	97.4499
LCM-20	b	16	30.095	35.705	1.388	1.393	0.272	0.008	26.926	0.157		0.173	0.269	0.688	0.296	0.28	0.521	98.171	0.219377	97.9516
LCM-20	b	17	30.053	34.104	1.385	1.446	0.251	0.007	26.862	0.211		0.136	0.307	0.653	0.27	0.31	0.509	96.504	0.214325	96.2897
LCM-20	b	18	29.932	35.308	1.465	1.474	0.261	0.005	26.98	0.203		0.173	0.217	0.554	0.204	0.26	0.619	97.655	0.260642	97.3944
LCM-20	b	19	30.093	35.288	1.45	1.463	0.281	0.014	26.787	0.203		0.167	0.279	0.615	0.244	0.305	0.502	97.691	0.211377	97.4796
LCM-20	b	20	29.762	34.55	1.439	1.412	0.257	0.016	26.71	0.271		0.182	0.23	0.56	0.256	0.286	0.864	96.795	0.363804	96.4312
LCM-21	a	1	29.438	34.562	1.345	2.249	0.27	0.033	25.707	0.437		0.552	0.36	1.497	0.847	0.892	0.51	98.699	0.214746	98.4843
LCM-21	a	2	29.287	34.305	1.424	2.183	0.291	0.041	25.583	0.359		0.583	0.397	1.483	0.871	0.883	0.465	98.155	0.195798	97.9592
LCM-21	a	3	29.197	34.275	1.29	1.837	0.273	0.019	25.805	0.497		0.518	0.513	1.79	0.842	0.79	0.321	97.967	0.135163	97.8318
LCM-21	a	5	29.343	34.68	1.225	2.019	0.298	0.031	25.45	0.443		0.585	0.433	1.71	0.757	0.957	0.304	98.235	0.128005	98.107
LCM-21	a	6	29.363	34.747	1.285	2.163	0.281	0.051	25.488	0.315		0.596	0.438	1.572	0.78	0.831	0.332	98.242	0.139795	98.1022
LCM-21	a	7	29.415	34.447	1.362	2.138	0.282	0.037	25.605	0.293		0.638	0.398	1.426	0.883	0.895	0.352	98.171	0.148217	98.0228
LCM-21	a	8	29.496	34.386	1.354	2.172	0.274	0.025	25.812	0.298		0.598	0.352	1.503	0.772	0.846	0.38	98.268	0.160007	98.108
LCM-21	a	9	29.427	34.319	1.401	2.268	0.265	0.034	25.532	0.42		0.585	0.347	1.363	0.726	0.812	0.42	97.919	0.176849	97.7422
LCM-21	a	10	29.431	34.247	1.449	2.268	0.274	0.024	25.392	0.364		0.552	0.337	1.424	0.699	0.774	0.499	97.734	0.210114	97.5239
LCM-22	a	1	28.941	33.368	1.39	2.751	0.308	0.045	24.568	0.126		1.205	0.271	1.379	1.11	1.215	0.494	97.171	0.208009	96.963
LCM-22	a	2	29.668	34.212	1.297	2.312	0.28	0.031	25.471	0.116		0.601	0.445	1.513	0.757	0.782	0.495	97.98	0.20843	97.7716
LCM-22	a	3	29.489	34.666	1.305	2.335	0.31	0.019	25.558	0.149		0.543	0.42	1.591	0.683	0.77	0.427	98.265	0.179797	98.0852
LCM-22	a	4	29.44	34.814	1.278	2.243	0.279	0.023	25.616	0.156		0.616	0.426	1.418	0.606	0.72	0.421	98.056	0.17727	97.8787
LCM-22	a	5	29.424	34.686	1.284	2.248	0.322	0.033	25.296	0.217		0.653	0.338	1.388	0.763	0.852	0.484	97.988	0.203798	97.7842
LCM-22	a	6	29.314	33.655	1.348	2.267	0.282	0.041	25.505	0.25		0.714	0.417	1.45	0.794	0.856	0.415	97.308	0.174744	97.1333
LCM-22	a	7	29.352	33.883	1.33	2.373	0.306	0.038	25.652	0.116		0.71	0.401	1.408	0.749	0.845	0.461	97.624	0.194113	97.4299
LCM-22	a	8	29.358	34.233	1.336	2.412	0.259	0.037	25.523	0.208		0.674	0.418	1.53	0.777	0.797	0.426	97.988	0.179376	97.8086
LCM-22	a	9	29.438	33.002	1.363	2.343	0.261	0.039	25.605	0.142		0.691	0.467	1.396	0.768	0.815	0.452	96.782	0.190324	96.5917
LCM-22	a	10	29.481	34.031	1.314	2.356	0.282	0.039	25.69	0.158		0.68	0.392	1.592	0.775	0.777	0.437	98.004	0.184008	97.82
LCM-22	a	11	29.609	34.059	1.328	2.31	0.222	0.04	25.559	0.151		0.621	0.46	1.537	0.729	0.801	0.486	97.912	0.20464	97.7074
LCM-22	a	12	29.409	34.044	1.328	2.382	0.273	0.028	25.66	0.099		0.625	0.441	1.44	0.741	0.811	0.404	97.685	0.170112	97.5149
LCM-22	a	13	29.448	34.187	1.322	2.35	0.276	0.026	25.712	0.165		0.604	0.43	1.615	0.674	0.729	0.452	97.99	0.190324	97.7997
LCM-22	a	14	29.668	34.098	1.288	2.233	0.27	0.013	25.735	0.224		0.602	0.557	1.586	0.742	0.794	0.381	98.191	0.160428	98.0306
LCM-22	a	15	29.4	34.674	1.29	2.325	0.282	0.017	25.796	0.139		0.519	0.43	1.57	0.706	0.777	0.435	98.36	0.183165	98.1768
LCM-22	a	16	29.407	34.538	1.219	2.217	0.287	0.033	25.532	0.215		0.562	0.473	1.49	0.709	0.748	0.522	97.952	0.219799	97.7322
LCM-22	a	17	29.474	34.828	1.225	2.275	0.316	0.025	25.622	0.212		0.587	0.473	1.708	0.746	0.888	0.422	98.801	0.177692	98.6233
LCM-22	a	18	29.434	34.347	1.273	2.315	0.265	0.026	25.515	0.248		0.58	0.483	1.58	0.735	0.894	0.419	98.114	0.176428	97.9376
LCM-22	a	19	29.196	33.906	1.32	2.547	0.304	0.041	24.741	0.166		0.964	0.376	1.471	1.309	1.283	0.411	98.035	0.17306	97.8619
LCM-22	a	20	29.355	33.986	1.308	2.508	0.268	0.028	24.525	0.221		1.258	0.288	1.391	1.27	1.321	0.339	98.066	0.142743	97.9233
LCM-22	b	2	29.032	33.711	1.391	2.588	0.213	0.048	24.448	0.233		1.57	0.301	1.448	1.384	1.485	0.288	98.14	0.121268	98.0187
LCM-22	b	3	28.911	32.99	1.321	2.365	0.171	0.041	24.367	0.226		1.505	0.314	1.485	1.354	1.426	0.339	96.815	0.142743	96.6723
LCM-22	b	4	29.024	33.457	1.364	2.56	0.236	0.047	24.461	0.287		1.558	0.292	1.344	1.275	1.356	0.311	97.572	0.130953	97.441
LCM-22	b	5	28.898	32.94	1.424	2.589	0.186	0.043	24.356	0.262		1.633	0.289	1.375	1.301	1.402	0.328	97.026	0.138111	96.8879
LCM-22	b	6	28.917	33.173	1.419	2.666	0.208	0.044	24.101	0.24		1.654	0.346	1.422	1.389	1.44	0.29	97.309	0.12211	97.1869
LCM-22	b	7	29.21	33.393	1.395	2.616	0.18	0.046	24.852	0.161		1.325	0.253	1.192	1.101	1.211	0.388	97.323	0.163375	97.1596
LCM-22	b	8	29.023	33.988	1.364	2.547	0.193	0.041	24.576	0.221		1.481	0.289	1.428	1.449	1.414	0.302	98.316	0.127163	98.1888
LCM-22	b	9	29.06	33.778	1.38	2.544	0.165	0.028	24.356	0.173		1.428	0.3	1.511	1.366	1.42	0.286	97.795	0.120426	97.6746
LCM-22	b	10	29.513	33.985	1.475	2.653	0.159	0.035	24.702	0.17		1.567	0.284	1.461	1.381	1.439	0.58	99.404	0.244221	99.1598
LCM-22	c	1.1	28.6714	32.6801	1.39442	2.56551	0.398989	0.0447735	24.1891	0.13733	0.269852	1.09469	0.323685	1.43715	1.27952	0.340913	0.182	95.0095	0.0766347	94.9328
LCM-22	d	2.1	28.8939	34.5083	1.07888	1.62465	0.353796	0	25.3505	0.311854		0.40384	0.455036	2.00639	0.678835	0.105521	0.235	96.0064	0.0989514	95.9075
LCM-23	a	1	28.97	33.465	1.43	2.607	0.189	0.028	24.601	0.163		1.11	0.366	1.638	1.191	1.217	0.401	97.376	0.168849	97.2072
LCM-23	a	2	28.962	32.367	1.421	2.683	0.202	0.042	24.799	0.149		1.094	0.394	1.613	1.216	1.154	0.39	96.486	0.164217	96.3218
LCM-23	a	3	28.942	32.97	1.43	2.714	0.192	0.044	24.843	0		1.113	0.385	1.511	1.147	1.269	0.363	96.923	0.152848	96.7702
LCM-23	a	4	28.82	33.447	1.435	2.711	0.213	0.035	24.533	0.152		1.173	0.39	1.501	1.062	1.186	0.315	96.973	0.132637	96.8404
LCM-23	a	5	28.781	31.996	1.453	2.732	0.178	0.037	24.707	0.135		1.074	0.385	1.487	1.055	1.218	0.359	95.597	0.151164	95.4458
LCM-23	a	6	28.885	32.925	1.433	2.744	0.218	0.054	24.8	0.135		1.043	0.352	1.476	1.094	1.151	0.367	96.677	0.154533	96.5225
LCM-23	a	7	28.765	33.041	1.438	2.72	0.234	0.036	24.732	0.199		1.071	0.377	1.503	1.116	1.284	0.419	96.935	0.176428	96.7586
LCM-23	a	8	28.334	32.999	1.301	2.421	0.253	0.036	23.611	0.477		1.229	0.507	2.117	1.396	1.544	0.227	96.452	0.0955829	96.3564
LCM-23	a	9	28.72	32.518	1.366	2.544	0.245	0.045	24.584	0.204		1.037	0.442	1.678	1.12	1.169	0.398	96.07	0.167586	95.9024
LCM-23	a	10	28.87	34.366	1.101	2.002	0.23	0.014	24.874	0.272		0.97	0.46	1.603	1.123	1.096	0.223	97.204	0.0938986	97.1101
LCM-23	b	1	29.795	35.215	1.438	1.925	0.119	0.021	25.711	0.259		0.629	0.315	1.2	0.863	0.868	0.416	98.774	0.175165	98.5988
LCM-23	b	2	29.726	34.59	1.414	1.982	0.149	0.017	25.96	0.259		0.634	0.36	1.152	0.802	0.888	0.368	98.301	0.154954	98.146
LCM-23	b	3	29.651	34.515	1.48	1.863	0.117	0.034	25.999	0.142		0.659	0.313	1.285	0.897	0.851	0.329	98.135	0.138532	97.9965
LCM-23	b	4	29.374	34.805	1.491	1.781	0.101	0.035	25.936	0.194		0.699	0.288	1.264	0.933	0.897	0.351	98.149	0.147796	98.0012
LCM-23	b	5	29.718	35.368	1.52	1.889	0.094	0.023	25.851	0.134		0.717	0.208	1.184	0.955	0.976	0.376	99.013	0.158322	98.8547
LCM-23	b	6	29.513	34.873	1.524	1.803	0.089	0.026	25.633	0.185		0.728	0.331	1.104	0.88	1.036	0.42	98.145	0.176849	97.9682
LCM-23	b	7	29.326	34.877	1.425	1.778	0.117	0.033	25.737	0.243		0.712	0.305	1.097	0.896	0.917	0.311	97.774	0.130953	97.643
LCM-23	b	8	29.382	34.136	1.412	1.785	0.101	0.027	25.745	0.139		0.699	0.312	1.156	0.874	0.915	0.285	96.968	0.120005	96.848
LCM-23	b	9	29.367	34.702	1.395	1.677	0.13	0.024	25.857	0.146		0.711	0.347	1.216	0.911	0.943	0.312	97.738	0.131374	97.6066
LCM-23	b	10	29.101	34.649	1.523	1.835	0.097	0.024	25.559	0.196		0.717	0.273	1.132	0.865	0.967	0.423	97.361	0.178113	97.1829
LCM-23	c	1.1	29.3645	34.4599	1.4889	1.75833	0.112337	0	25.6765	0.171663		0.464797	0.331895	1.28606	0.801305	0.150744	0.148	96.2149	0.0623184	96.1526
LCM-23	d	2.1	29.1698	33.8961	1.55692	1.84316	0.13687	0.00165828	25.6863	0.153066	0.0647156	0.466067	0.301403	1.19353	0.673003	0.102042	0.397	95.6416	0.167165	95.4745
LCM-23	e	3.1	28.8789	32.927	1.4171	2.39328	0.269866	0.029849	24.4984	0.241759		0.941024	0.246282	1.56834	1.05674	0.347871	0.25	95.0663	0.105267	94.9611
LCM-25	a	3	29.556	34.549	1.406	1.916	0.169	0.034	25.766	0.207		0.35	0.293	1.118	0.594	0.581	0.463	97.002	0.194955	96.807
LCM-25	a	4	29.2	34.528	1.275	1.737	0.163	0.028	25.716	0.202		0.418	0.322	1.116	0.66	0.714	0.378	96.457	0.159164	96.2978
LCM-25	a	5	29.386	32.902	1.32	1.704	0.187	0.025	26.037	0.232		0.451	0.36	1.249	0.658	0.759	0.327	95.597	0.13769	95.4593
LCM-25	a	6	29.423	33.97	1.472	1.902	0.231	0.047	25.772	0.282		0.416	0.39	1.329	0.678	0.698	0.449	97.059	0.18906	96.8699
LCM-25	a	7	29.254	34.002	1.373	1.937	0.188	0.023	25.542	0.282		0.449	0.414	1.477	0.7	0.739	0.438	96.818	0.184429	96.6336
LCM-25	a	8	29.17	32.686	1.488	2.378	0.282	0.029	24.949	0.318		0.563	0.471	1.593	0.77	0.903	0.46	96.06	0.193692	95.8663
LCM-25	a	9	29.218	32.877	1.493	2.273	0.295	0.047	25.088	0.203		0.642	0.419	1.546	0.847	0.925	0.48	96.353	0.202114	96.1509
LCM-25	a	10	28.754	33.289	1.236	2.061	0.23	0.046	24.425	0.5		0.762	0.45	1.79	0.94	1.083	0.317	95.883	0.133479	95.7495
LCM-25	b	1	29.531	33.345	1.48	1.759	0.153	0.018	25.426	0.196		0.396	0.29	1.06	0.525	0.649	0.337	95.165	0.141901	95.0231
LCM-25	b	2	29.191	33.996	1.412	1.877	0.169	0.034	25.477	0.214		0.385	0.293	1.195	0.544	0.681	0.427	95.895	0.179797	95.7152
LCM-25	b	3	29.37	33.552	1.327	1.69	0.171	0.022	25.794	0.214		0.381	0.324	1.116	0.528	0.658	0.4	95.547	0.168428	95.3786
LCM-25	b	4	29.507	34.438	1.337	1.802	0.13	0.021	25.492	0.264		0.373	0.325	1.17	0.653	0.701	0.353	96.566	0.148638	96.4174
LCM-25	b	5	29.387	34.52	1.375	1.735	0.204	0.023	25.748	0.184		0.418	0.378	1.181	0.663	0.729	0.434	96.979	0.182744	96.7963
LCM-25	b	6	29.869	34.842	1.476	1.839	0.198	0.019	26.142	0.247		0.415	0.338	1.178	0.594	0.688	0.429	98.274	0.180639	98.0934
LCM-25	b	8	29.592	33.169	1.494	1.886	0.189	0.035	25.87	0.268		0.404	0.3	1.187	0.659	0.591	0.398	96.042	0.167586	95.8744
LCM-25	b	9	29.297	34.222	1.328	1.822	0.176	0.02	25.58	0.249		0.388	0.405	1.258	0.655	0.736	0.418	96.554	0.176007	96.378
LCM-25	b	10	29.427	33.543	1.462	1.902	0.202	0.022	25.494	0.191		0.392	0.358	1.297	0.59	0.695	0.4	95.975	0.168428	95.8066
LCM-25	b	11	29.291	32.8	1.346	1.975	0.177	0.042	25.423	0.29		0.426	0.441	1.337	0.766	0.811	0.424	95.549	0.178534	95.3705
LCM-25	b	13	28.936	33.305	1.328	1.887	0.171	0.034	25.485	0.193		0.468	0.385	1.422	0.743	0.795	0.349	95.501	0.146953	95.354
LCM-25	b	14	29.194	32.882	1.303	1.845	0.158	0.038	25.707	0.284		0.422	0.42	1.471	0.702	0.784	0.425	95.635	0.178955	95.456
LCM-25	b	15	29.037	33.849	1.292	1.833	0.158	0.036	25.269	0.193		0	0.33	1.46	0.739	0.764	0.314	95.274	0.132216	95.1418
LCM-25	c	1.1	28.926	33.4124	1.37175	1.73391	0.290526	0.00829138	25.156	0.243189	0	0.242558	0.21579	1.23921	0.677669	0.0904463	0.287	93.8946	0.120847	93.7738
LCM-32	1.1		29.414	35.45	1.382	1.621	0.203	0.016	26.329			0.319	0.27	0.934	0.493	0.138	0.013	96.582	0.00547391	96.5765
LCM-32	1.2rim		29.217	34.85	1.328	1.838	0.178	0.006	26.196			0.35	0.235	1.068	0.635	0.073	0.012	95.986	0.00505284	95.9809
LCM-32	1.3rim		29.367	35.417	1.368	1.576	0.197	0.018	26.314			0.338	0.288	1.021	0.569	0.153	0.02	96.646	0.0084214	96.6376
LCM-32	1.4core		29.156	35.298	1.672	1.615	0.158	0.019	26.418			0.426	0.343	0.947	0.54	0.095	0.002	96.689	0.00084214	96.6882
LCM-32	1.5core		29.534	35.217	1.383	1.647	0.162	0.018	26.285			0.29	0.332	0.982	0.486	0.169	0.008	96.513	0.00336856	96.5096
LCM-32	2.1core		29.511	34.624	1.492	1.708	0.141	0.021	25.881			0.411	0.299	1.194	0.591	0.104	0.016	95.993	0.00673712	95.9863
LCM-32	2.2 rim		28.834	34.692	1.526	1.701	0.177	0.008	25.662			0.418	0.26	1.177	0.706	0.12	0.025	95.306	0.0105268	95.2955
LCM-32	2.3core		29.696	34.361	1.88	1.643	0.159	0.027	25.704			0.426	0.354	1.073	0.634	0.15	0	96.107	0	96.107
LCM-32	2.4rim		29.942	34.502	1.442	1.667	0.183	0.014	26.045			0.451	0.326	1.136	0.588	0.14	0.02	96.456	0.0084214	96.4476
LCM-32	2.5core		29.296	33.896	2.199	1.691	0.184	0.008	25.542			0.347	0.355	1.201	0.546	0.141	0.037	95.443	0.0155796	95.4274
LCM-32	3.1core		29.595	34.847	1.25	1.56	0.171	0.014	26.018			0.368	0.372	1.185	0.582	0.146	0	96.108	0	96.108
LCM-32	3.3core		29.464	35.128	1.403	1.656	0.155	0.027	26.18			0.428	0.428	1.127	0.595	0.089	0.026	96.706	0.0109478	96.6951
LCM-32	3.4rim		30.317	34.76	1.398	1.66	0.167	0.02	26.41			0.34	0.339	1.207	0.632	0.146	0.012	97.408	0.00505284	97.4029
LCM-32	3.5core		29.29	34.795	1.42	1.622	0.16	0.011	26.061			0.403	0.311	1.081	0.553	0.131	0	95.838	0	95.838
LCM-32	4.1		29.158	34.325	1.464	1.999	0.246	0.025	25.533			0.488	0.374	1.42	0.867	0.179	0.008	96.086	0.00336856	96.0826
LCM-32	4.2rim		28.486	34.666	1.558	1.685	0.197	0.017	26.061			0.459	0.272	1.131	0.67	0.142	0	95.344	0	95.344
LCM-32	4.3rim		29.601	33.88	1.691	2.05	0.198	0.026	25.44			0.488	0.366	1.522	0.801	0.142	0	96.205	0	96.205
LCM-32	4.4core		29.625	33.906	1.622	2.254	0.272	0.033	25.501			0.564	0.337	1.516	0.8	0.21	0.025	96.665	0.0105268	96.6545
LCM-32	5.1core		29.014	33.712	1.495	2.288	0.281	0.049	25.097			0.726	0.311	1.396	0.898	0.191	0.013	95.471	0.00547391	95.4655
LCM-32	5.3core		29.545	33.624	1.617	2.098	0.253	0.027	25.414			0.508	0.363	1.371	0.735	0.153	0.015	95.723	0.00631605	95.7167
LCM-32	5.4rim		28.81	33.246	2.174	2.244	0.262	0.039	24.603			0.673	0.399	1.477	0.885	0.181	0.006	94.999	0.00252642	94.9965
LCM-32	5.5rim		29.479	34.422	1.561	1.654	0.175	0.009	25.809			0.489	0.384	1.095	0.612	0.173	0.005	95.867	0.00210535	95.8649
LCM-32	6.3core		29.66	33.98	1.254	2.023	0.252	0.032	25.042			0.706	0.324	1.411	0.982	0.228	0.026	95.92	0.0109478	95.9091
LCM-32	6.5rim		29.115	33.244	1.538	2.321	0.272	0.029	24.925			0.851	0.339	1.339	1.15	0.311	0.002	95.436	0.00084214	95.4352
LCM-32	7.1core		28.153	34.697	1.509	1.626	0.203	0.012	25.813			0.359	0.338	1.114	0.606	0.153	0.026	94.609	0.0109478	94.5981
LCM-32	7.2rim		29.292	33.561	1.567	1.696	0.181	0.023	25.779			0.449	0.365	1.309	0.597	0.097	0.027	94.943	0.0113689	94.9316
LCM-32	7.3core		29.125	33.937	1.564	1.666	0.2	0.019	26.014			0.42	0.38	1.151	0.537	0.127	0	95.14	0	95.14
LCM-32	7.4rim		28.877	34.73	1.539	1.661	0.16	0	25.87			0.355	0.293	1.107	0.541	0.113	0.021	95.267	0.00884247	95.2582
LCM-32	8.1core		29.418	34.371	1.482	1.675	0.166	0.009	25.967			0.394	0.336	1.035	0.549	0.191	0	95.593	0	95.593
LCM-32	8.2core		29.785	34.672	1.423	1.701	0.157	0.019	25.852			0.368	0.326	1.176	0.597	0.113	0.021	96.21	0.00884247	96.2012
LCM-32	8.3core		28.856	34.125	2.037	1.719	0.175	0.005	25.877			0.305	0.366	1.12	0.502	0.114	0.001	95.202	0.00042107	95.2016
LCM-32	8.4rim		27.49	34.225	1.989	1.649	0.183	0.023	25.472			0.521	0.372	1.094	0.545	0.092	0.022	93.677	0.00926354	93.6677
LCM-32	8.5rim		27.361	33.801	1.614	1.699	0.188	0.023	25.282			0.45	0.44	1.175	0.636	0.135	0.02	92.824	0.0084214	92.8156
LCM-32	1.6		29.129	34.754	1.403	1.616	0.203	0.023	26.026			0.38	0.333	1.054	0.595	0.148	0	95.664	0	95.664
LCM-32	1.8		27.61	34.419	1.424	1.692	0.217	0.019	26.037			0.414	0.211	1.056	0.611	0.144	0	93.854	0	93.854
LCM-32	2.6		27.573	34.5	1.459	1.616	0.183	0.015	25.271			0.414	0.342	1.151	0.566	0.096	0.059	93.245	0.0248431	93.2202
LCM-32	2.8		29.111	34.443	1.508	1.601	0.172	0.015	25.739			0.341	0.262	1.106	0.645	0.106	0.013	95.062	0.00547391	95.0565
LCM-32	2.9		27.657	34.35	1.577	1.74	0.188	0.037	25.42			0.377	0.312	1.171	0.579	0.082	0.033	93.523	0.0138953	93.5091
LCM-32	2.1		27.309	33.871	1.472	1.702	0.193	0.025	25.554			0.31	0.33	1.13	0.523	0.127	0.022	92.568	0.00926354	92.5587
LCM-32	6.6		26.314	32.145	1.346	1.886	0.201	0.029	25.793			0.751	0.408	1.421	0.909	0.199	0.16	91.562	0.0673712	91.4946
LCM-32	6.7		28.929	33.221	1.491	2.324	0.258	0.041	24.474			1.021	0.316	1.343	1.138	0.281	0.023	94.86	0.00968461	94.8503
LCM-32	6.9		28.16	33.325	1.478	2.071	0.264	0.036	24.126			0.92	0.328	1.351	1.056	0.22	0.009	93.344	0.00378963	93.3402
LCM-33	a	1	29.207	34.449	1.361	1.739	0.143	0.017	25.783	0.165		0.434	0.329	1.058	0.647	0.678	0.556	96.566	0.234115	96.3319
LCM-33	a	2	29.063	34.893	1.35	1.825	0.16	0.012	25.666	0.258		0.393	0.38	1.136	0.58	0.589	0.452	96.757	0.190324	96.5667
LCM-33	a	3	29.009	34.242	1.414	1.744	0.186	0.011	25.775	0.254		0.415	0.324	1.118	0.596	0.661	0.441	96.19	0.185692	96.0043
LCM-33	a	4	29.24	34.254	1.325	1.787	0.214	0.017	25.922	0.226		0.423	0.334	1.12	0.629	0.624	0.509	96.624	0.214325	96.4097
LCM-33	a	5	29.168	34.648	1.259	1.823	0.181	0.023	25.451	0.247		0.483	0.393	1.24	0.72	0.801	0.346	96.783	0.14569	96.6373
LCM-33	a	6	29.142	34.225	1.262	1.792	0.211	0.024	25.867	0.341		0.49	0.346	1.231	0.712	0.733	0.318	96.694	0.1339	96.5601
LCM-33	a	7	29.329	34.092	1.269	1.809	0.139	0.026	25.986	0.28		0.462	0.314	1.357	0.659	0.756	0.42	96.898	0.176849	96.7212
LCM-33	a	8	29.191	34.373	1.305	1.895	0.196	0.022	25.784	0.254		0.413	0.32	1.278	0.686	0.641	0.413	96.771	0.173902	96.5971
LCM-33	a	9	29.056	34.188	1.357	1.788	0.223	0.036	25.623	0.324		0.431	0.421	1.236	0.657	0.74	0.413	96.493	0.173902	96.3191
LCM-33	a	10	29.3	34.344	1.284	1.821	0.251	0.047	25.74	0.238		0.434	0.355	1.308	0.692	0.711	0.356	96.881	0.149901	96.7311
LCM-33	a	11	29.229	34.252	1.257	1.798	0.161	0.016	25.638	0.271		0.451	0.367	1.304	0.658	0.79	0.329	96.521	0.138532	96.3825
LCM-33	a	12	29.196	35.207	1.284	1.539	0.219	0.024	25.569	0.341		0.345	0.529	1.559	0.764	0.73	0.278	97.584	0.117057	97.4669
LCM-33	a	13	29.239	35.081	1.144	1.58	0.172	0.02	25.324	0.36		0.416	0.481	1.382	0.758	0.928	0.281	97.166	0.118321	97.0477
LCM-33	a	14	29.324	34.31	1.281	1.79	0.202	0.025	25.451	0.266		0.437	0.427	1.379	0.693	0.862	0.347	96.794	0.146111	96.6479
LCM-33	a	15	29.334	33.909	1.267	1.745	0.158	0.038	25.926	0.303		0.394	0.34	1.291	0.707	0.714	0.385	96.511	0.162112	96.3489
LCM-33	a	16	29.389	34.516	1.292	1.769	0.139	0.03	25.877	0.308		0.445	0.456	1.351	0.686	0.767	0.389	97.414	0.163796	97.2502
LCM-33	a	17	29.296	34.122	1.297	1.772	0.175	0.035	25.799	0.245		0.404	0.319	1.241	0.719	0.738	0.31	96.472	0.130532	96.3415
LCM-33	a	18	29.407	34.052	1.343	1.803	0.178	0.015	25.848	0.238		0.419	0.414	1.083	0.702	0.676	0.436	96.614	0.183587	96.4304
LCM-33	a	19	29.465	34.911	1.31	1.825	0.195	0.014	25.936	0.237		0.389	0.391	1.135	0.637	0.597	0.431	97.473	0.181481	97.2915
LCM-33	a	20	29.43	35.16	1.378	1.823	0.161	0.026	25.967	0.214		0.383	0.369	1.121	0.669	0.593	0.47	97.764	0.197903	97.5661
LCM-33	b	1	28.768	34.245	1.337	1.519	0.172	0.176	25.231	0.24		0.352	0.371	1.058	0.589	0.587	0.462	95.107	0.194534	94.9125
LCM-33	b	2	29.457	34.563	1.368	1.673	0.171	0.023	25.905	0.282		0.439	0.343	1.122	0.585	0.63	0.454	97.015	0.191166	96.8238
LCM-33	b	3	29.359	34.721	1.323	1.831	0.149	0.041	25.755	0.217		0.476	0.367	1.279	0.773	0.851	0.366	97.508	0.154112	97.3539
LCM-33	b	4	28.998	35.394	1.167	1.748	0.167	0.05	25.72	0.451		0.505	0.374	1.382	0.744	0.788	0.352	97.84	0.148217	97.6918
LCM-33	b	5	29.422	34.244	1.361	1.936	0.209	0.037	25.247	0.306		0.445	0.367	1.38	0.651	0.865	0.304	96.774	0.128005	96.646
LCM-33	b	6	29.276	34.243	1.335	2.004	0.218	0.051	25.575	0.306		0.508	0.396	1.462	0.723	0.955	0.397	97.449	0.167165	97.2818
LCM-33	b	7	29.308	34.279	1.406	1.949	0.207	0.043	25.402	0.361		0.469	0.366	1.568	0.764	0.86	0.435	97.417	0.183165	97.2338
LCM-33	b	8	29.111	33.835	1.369	2.109	0.199	0.05	25.335	0.292		0.426	0.411	1.472	0.756	0.654	0.438	96.457	0.184429	96.2726
LCM-33	b	9	29.224	33.728	1.298	2.044	0.238	0.041	25.261	0.252		0.467	0.339	1.439	0.817	0.765	0.402	96.315	0.16927	96.1457
LCM-33	b	10	29.174	34.179	1.365	2.108	0.231	0.033	25.442	0.309		0.435	0.398	1.405	0.761	0.734	0.345	96.919	0.145269	96.7737
LCM-33	b	11	29.204	34.194	1.305	1.843	0.227	0.032	25.287	0.339		0.489	0.424	1.54	0.877	0.892	0.309	96.962	0.130111	96.8319
LCM-33	b	12	29.284	34.532	1.312	1.9	0.183	0.041	24.931	0.408		0.503	0.537	1.697	0.89	0.989	0.258	97.465	0.108636	97.3564
LCM-33	b	13	29.204	33.952	1.264	1.882	0.212	0.041	25.141	0.396		0.5	0.45	1.598	0.841	0.982	0.315	96.778	0.132637	96.6454
LCM-33	b	14	29.559	34.093	1.467	2.119	0.188	0.036	25.526	0.337		0.493	0.38	1.477	0.732	0.81	0.472	97.689	0.198745	97.4903
LCM-33	b	15	29.519	34.171	1.372	1.988	0.196	0.036	24.938	0.276		0.438	0.391	1.398	0.786	0.802	0.488	96.799	0.205482	96.5935
LCM-33	c	1.1	29.1634	33.4741	1.38498	2.0938	0.344757	0.0265324	24.8426	0.364784		0.549883	0.437444	1.40202	0.69983	0.117116	0.423	95.3242	0.178113	95.1461
LCM-33	d	2.1	29.2618	34.4099	1.30184	1.64779	0.174316	0.00165828	25.8612	0.211718	0.119663	0.255258	0.307266	1.22867	0.607686	0.156542	0.595	96.1403	0.250537	95.8897
LCM-39	a	1	29.623	35.026	1.315	1.688	0.181	0.031	25.908	0.261		0.407	0.345	1.18	0.63	0.603	0.376	97.574	0.158322	97.4157
LCM-39	a	2	29.583	34.465	1.332	1.804	0.164	0.015	25.726	0.172		0.421	0.362	1.234	0.658	0.663	0.415	97.014	0.174744	96.8393
LCM-39	a	3	29.419	33.673	1.296	1.86	0.155	0.026	25.886	0.273		0.391	0.401	1.349	0.737	0.762	0.303	96.531	0.127584	96.4034
LCM-39	a	4	29.305	33.87	1.279	1.758	0.183	0.015	25.639	0.414		0.412	0.518	1.697	0.788	0.885	0.327	97.09	0.13769	96.9523
LCM-39	a	5	29.411	34.707	1.273	1.52	0.181	0.013	25.395	0.397		0.36	0.559	1.611	0.736	0.812	0.235	97.21	0.0989514	97.111
LCM-39	a	6	33.212	32.301	1.616	1.445	0.186	0.029	23.976	0.423		0.32	0.467	1.574	0.611	0.72	0.309	97.189	0.130111	97.0589
LCM-39	a	7	29.328	34.635	1.279	1.483	0.204	0.017	25.748	0.406		0.37	0.499	1.589	0.722	0.825	0.299	97.404	0.1259	97.2781
LCM-39	a	8	29.396	34.557	1.192	1.758	0.18	0.029	25.944	0.303		0.421	0.417	1.318	0.826	0.814	0.332	97.487	0.139795	97.3472
LCM-39	a	9	29.476	34.513	1.36	2.144	0.191	0.013	25.914	0.252		0.409	0.291	1.312	0.663	0.736	0.423	97.697	0.178113	97.5189
LCM-39	a	10	29.436	35.426	1.148	1.67	0.205	0.011	25.503	0.402		0.41	0.429	1.448	0.724	0.838	0.314	97.964	0.132216	97.8318
LCM-39	c	1.1	30.0192	35.9344	1.3094	1.82902	0.241459	0	26.467	0.294688	0.30282	0.260337	0.462073	1.43715	0.641511	0.16118	0.382	99.7423	0.160849	99.5814
DQW-21	a	1	28.53	33.061	0.844	3.265	0.59	0.068	23.525	0.154613	0	1.904	0.245	1.138	1.254	0.404	0.361	95.3436	0.152006	95.1916
DQW-21	a	2	28.835	33.029	0.928	3.137	0.526	0.052	23.928	0.222824	0.045	1.84	0.24	1.303	1.152	0.436	0.274	95.9478	0.115373	95.8325
DQW-21	a	3	28.692	33.159	0.978	3.065	0.497	0.076	23.89	0.222824	0	1.906	0.243	1.211	1.169	0.352	0.46	95.9208	0.193692	95.7271
DQW-21	a	4	28.27	33.105	0.951	3.163	0.475	0.06	23.567	0.325141	0	1.93	0.256	1.301	1.159	0.438	0.274	95.2741	0.115373	95.1588
DQW-21	a	5	28.598	33.343	0.913	3.147	0.474	0.073	23.72	0.171665	0.158	1.942	0.258	1.28	1.266	0.419	0.291	96.0537	0.122531	95.9311
DQW-21	a	6	28.751	33.18	0.993	3.075	0.477	0.066	23.872	0.179623	0	1.724	0.292	1.321	1.355	0.421	0.305	96.0116	0.128426	95.8832
DQW-21	a	7	28.494	32.827	0.865	3.225	0.531	0.059	23.575	0.00909486	0.093	1.945	0.26	1.227	1.269	0.449	0.274	95.1021	0.115373	94.9867
DQW-21	a	8	28.723	33.266	0.853	3.165	0.514	0.066	23.602	0.162571	0	1.916	0.302	1.204	1.187	0.39	0.351	95.7016	0.147796	95.5538
DQW-21	a	9	28.544	33.626	0.81	3.17	0.525	0.067	23.493	0.264888	0	1.907	0.332	1.12	1.203	0.427	0.306	95.7949	0.128847	95.666
DQW-21	a	10	28.723	33.187	0.84	3.295	0.534	0.074	23.675	0.0773063	0	1.858	0.25	1.239	1.246	0.447	0.318	95.7633	0.1339	95.6294
DQW-21	a	11	28.793	32.631	0.906	3.465	0.582	0.074	23.801	0.30013	0.115	1.951	0.27	1.252	1.107	0.334	0.332	95.9131	0.139795	95.7733
DQW-21	a	12	28.914	33.404	0.781	3.241	0.59	0.044	24.198	0.3763	0	1.772	0.275	1.215	1.069	0.341	0.355	96.5753	0.14948	96.4258
DQW-21	a	15	28.754	33.468	0.793	3.041	0.533	0.064	24.059	0.11937	0.102	1.671	0.251	1.093	1.038	0.391	0.361	95.7384	0.152006	95.5864
DQW-21	a	16	28.635	33.658	0.813	3.247	0.521	0.077	23.761	0.162571	0.185	1.819	0.257	1.232	1.123	0.404	0.293	96.1876	0.123374	96.0642
DQW-21	a	17	28.636	33.418	0.769	3.166	0.562	0.066	23.777	0.230782	0.05	1.816	0.244	1.234	1.161	0.361	0.348	95.8388	0.146532	95.6922
DQW-21	a	18	28.602	33.005	0.875	3.424	0.617	0.08	23.747	0.179623	0	1.787	0.272	1.302	1.046	0.323	0.463	95.7226	0.194955	95.5277
DQW-21	a	19	29.015	33.044	0.859	3.293	0.527	0.079	24.218	0.247835	0.004	1.744	0.331	1.219	1.039	0.341	0.459	96.4198	0.193271	96.2266
DQW-21	a	20	28.882	32.636	0.958	3.78	0.571	0.071	24.293	0.25693	0	1.819	0.264	1.001	0.931	0.347	0.565	96.3749	0.237905	96.137
DQW-21	a	21	29.025	32.954	0.938	3.785	0.577	0.074	24.177	0.102317	0.032	1.768	0.214	1.032	0.987	0.284	0.568	96.5173	0.239168	96.2781
DQW-21	a	22	28.822	32.751	0.893	3.706	0.531	0.086	24.3	0	0	1.81	0.276	1.096	0.945	0.322	0.613	96.151	0.258116	95.8929
DQW-21	a	23	29.044	32.748	0.939	3.757	0.612	0.099	24.353	0.25693	0	1.853	0.22	1.057	0.917	0.29	0.589	96.7349	0.24801	96.4869
DQW-21	a	24	28.834	32.722	0.964	3.75	0.586	0.074	24.346	0.359247	0.065	1.797	0.236	1.057	0.984	0.297	0.534	96.6052	0.224851	96.3804
DQW-21	a	25	28.852	32.898	0.951	3.803	0.578	0.078	24.326	0.154613	0	1.839	0.186	1.094	0.901	0.314	0.547	96.5216	0.230325	96.2913
DQW-21	a	26	28.839	32.884	0.988	3.839	0.593	0.07	24.328	0	0.025	1.779	0.225	1.048	0.953	0.303	0.498	96.372	0.209693	96.1623
DQW-21	a	27	28.872	32.925	0.93	3.749	0.57	0.095	24.569	0.171665	0.011	1.764	0.177	1.107	0.915	0.31	0.554	96.7197	0.233273	96.4864
DQW-21	a	28	28.81	32.873	0.922	3.787	0.553	0.079	24.341	0.154613	0.077	1.783	0.209	1.103	0.943	0.308	0.53	96.4726	0.223167	96.2494
DQW-21	a	29	29.102	32.989	0.907	3.75	0.594	0.079	24.642	0.342194	0	1.761	0.231	0.985	0.936	0.362	0.553	97.2332	0.232852	97.0003
DQW-21	a	30	28.808	32.529	0.917	3.756	0.55	0.056	24.564	0.273983	0.104	1.827	0.251	1.047	0.981	0.301	0.564	96.529	0.237483	96.2915
DQW-21	b	1	28.941	32.642	0.928	3.527	0.576	0.062	23.979	0.360384	0.09	1.738	0.236	1.01	1.021	0.28	0.62	96.0104	0.261063	95.7493
DQW-21	b	2	28.938	32.756	0.932	3.375	0.528	0.072	24.112	0.248972	0	1.719	0.198	0.995	0.923	0.333	0.483	95.613	0.203377	95.4096
DQW-21	b	3	28.983	32.78	0.944	3.442	0.568	0.077	24.193	0.103454	0	1.797	0.209	1.024	0.894	0.308	0.392	95.7145	0.165059	95.5494
DQW-21	b	4	28.957	32.823	0.921	3.418	0.559	0.053	24.313	0.00909486	0	1.818	0.227	0.978	0.968	0.278	0.477	95.7991	0.20085	95.5982
DQW-21	b	5	28.918	33.069	0.941	3.485	0.546	0.071	24.309	0.0773063	0	1.753	0.213	1.005	0.953	0.321	0.412	96.0733	0.173481	95.8998
DQW-21	b	6	29.001	33.02	0.892	3.407	0.577	0.063	24.574	0.222824	0.11	1.726	0.205	0.995	0.837	0.326	0.484	96.4398	0.203798	96.236
DQW-21	b	7	28.88	32.767	0.891	3.449	0.54	0.063	24.361	0.179623	0.007	1.681	0.161	0.95	0.962	0.349	0.521	95.7616	0.219377	95.5422
DQW-21	b	8	29.12	32.601	0.899	3.611	0.568	0.075	24.464	0.248972	0.085	1.71	0.312	0.942	0.92	0.333	0.53	96.419	0.223167	96.1958
DQW-21	b	9	28.977	32.778	0.849	3.446	0.547	0.074	24.474	0.13756	0.009	1.724	0.256	0.961	0.976	0.254	0.458	95.9206	0.19285	95.7277
DQW-21	b	10	28.791	32.997	0.822	3.17	0.574	0.055	23.841	0.13756	0.018	1.885	0.25	1.13	1.12	0.408	0.347	95.5456	0.146111	95.3994
DQW-21	b	11	28.69	33.04	0.774	3.134	0.554	0.07	23.805	0.154613	0	1.89	0.22	1.206	1.074	0.335	0.399	95.3456	0.168007	95.1776
DQW-21	b	12	28.82	32.78	0.833	3.316	0.581	0.062	24.141	0.317183	0	1.787	0.28	1.195	1.105	0.36	0.47	96.0472	0.197903	95.8493
DQW-21	b	13	29.055	33.133	0.802	3.365	0.58	0.055	24.267	0.462701	0.111	1.658	0.254	1.032	1.006	0.313	0.505	96.5987	0.21264	96.3861
DQW-21	b	14	29.065	32.811	0.783	3.36	0.549	0.068	24.354	0.239877	0	1.743	0.232	0.956	0.955	0.3	0.411	95.8269	0.17306	95.6538
DQW-21	b	15	28.869	33.229	0.831	3.144	0.585	0.063	24.135	0.179623	0.059	1.782	0.233	1.122	0.946	0.319	0.455	95.9516	0.191587	95.76
DQW-21	b	16	28.978	33.285	0.817	3.443	0.573	0.079	24.237	0.162571	0.004	1.762	0.273	1.089	0.951	0.327	0.442	96.4226	0.186113	96.2365
DQW-21	b	17	29.041	33.381	0.855	3.359	0.559	0.056	24.147	0.273983	0	1.813	0.236	1.067	0.899	0.351	0.405	96.443	0.170533	96.2724
DQW-21	b	18	29.128	33.356	0.829	3.398	0.579	0.053	24.62	0.128465	0	1.654	0.263	0.982	0.869	0.305	0.39	96.5545	0.164217	96.3902
DQW-21	b	19	29.089	32.748	0.821	3.34	0.537	0.075	24.319	0.343331	0	1.686	0.228	1.029	0.902	0.287	0.513	95.9173	0.216009	95.7013
DQW-21	b	20	29.117	32.935	0.821	3.388	0.597	0.071	24.533	0.196676	0	1.608	0.205	0.976	0.969	0.307	0.515	96.2387	0.216851	96.0218
DQW-21	c		28.4767	32.927	1.00897	3.8367	0.515199	0.0713059	23.0488	0.10872	0	1.78553	0.159497	1.19821	1.30052	0.438317	0.616	95.4915	0.259379	95.2321
DQW-21	c		28.8489	33.1488	0.871043	3.71331	0.702427	0.0795973	23.2643	0.370506	0.1392	1.79188	0.350659	1.12325	1.06024	0.384977	0.351	96.2001	0.147796	96.0523
DQW-21	c		29.0094	33.2623	0.946621	3.58092	0.630119	0.0613562	22.4807	0.258925	0	1.54551	0.333067	1.3212	1.07424	0.379179	0.722	95.6055	0.304013	95.3015
DQW-21	d		29.0885	33.2456	0.897495	3.51922	0.650778	0.0563814	22.5199	0.276091	0	1.62171	0.213445	1.22867	1.19554	0.419764	0.451	95.3841	0.189903	95.1942
DQW-21	e		28.8126	33.4507	0.918279	3.46396	0.66369	0.0679893	22.657	0.349048	0.0122105	1.74743	0.19468	1.3294	1.27019	0.4302	0.362	95.7294	0.152427	95.577
MC-8	2.1		30.2908	35.9828	1.62872	1.73519	0.23113	0	26.3271	0.0958452	0	0.0927055	0.134869	0.424002	0.318423	0.110159	0.371	97.7428	0.156217	97.5866
MC-8	3.1		30.0812	35.9244	1.61738	1.74547	0.193684	0	26.4782	0.243189	0	0.171442	0.0809213	0.414631	0.307925	0.111319	0.345	97.7148	0.145269	97.5695
MC-8	4.1		29.9956	35.4557	1.7402	1.53725	0.132996	0	26.523	0.193121	0.423704	0.0253988	0.238073	0.671141	0.439726	0.0846485	0.502	97.9626	0.211377	97.7512
MC-8	4.2		29.3538	35.3773	1.70052	1.56039	0.180772	0	26.6013	0.177385	0	0.0152393	0.296712	0.653572	0.421064	0.144946	0.232	96.7151	0.0976882	96.6174
MC-17.9	2.1		29.9871	36.2113	1.29806	1.51411	0.196266	0	26.5859	0.447754	0	0.0685767	0.260356	0.726191	0.247273	0.108999	0.502	98.1539	0.211377	97.9426
MC-17.9	5.1		30.1732	35.4874	1.62494	1.66835	0.117502	0	25.9815	0.301841	0.025642	0.107945	0.157152	0.692224	0.367411	0.114797	0.288	97.1079	0.121268	96.9866
MC-19	1.1		29.6234	36.4265	1.51724	1.86372	0.165277	0.0116079	26.9413	0.19026	0.118442	0.320024	0.175916	0.85386	0.463054	0.18785	0.616	99.4745	0.259379	99.2151
MC-19	2.1		28.9388	35.7693	1.29617	1.49612	0.233712	0	25.6107	0.290397	0	0.347963	0.532439	1.9654	1.05208	0.195967	0	97.7291	0	97.7291
MC-19	4.1		28.5131	33.4708	1.75342	2.78402	0.275031	0.0265324	24.9811	0.181677	0	1.00833	0.34245	1.5004	1.27952	0.391934	0.508	97.0162	0.213904	96.8023
MC-26	1.1		29.9978	36.3898	1.54558	1.5771	0.237586	0	27.4353	0.161649	0.312589	0.126994	0.286157	0.836291	0.281098	0.042904	0.759	99.9898	0.319592	99.6702
MC-26	2.1		28.9153	36.1997	1.30562	1.52568	0.182063	0	27.0589	0.291827	0	0.189221	0.10555	0.676997	0.418732	0.10668	0.014	96.9902	0.00589498	96.9843
MC-26	3.1		30.0684	35.5024	1.75531	2.15549	0.109754	0.00994966	27.3527	0.208857	0.0427367	0.104135	0.303748	0.73439	0.35808	0.0869676	1.107	99.8999	0.466124	99.4338
MC-26	3.2		30.1475	35.8677	1.69674	2.11693	0.165277	0	27.5234	0.175955	0.129431	0	0.272083	0.766014	0.30326	0.0846485	1.198	100.447	0.504442	99.9425
MC-26	4.1		29.6747	36.5816	1.4889	1.52697	0.178189	0	27.4171	0.158788	0.0219789	0.0457178	0.27912	0.708622	0.247273	0.0730528	0.498	98.9	0.209693	98.6903
						0
MC-27.5	1.1		29.0201	34.4032	0.638639	3.41511	0.675311	0.0464317	23.5371	0.263217	0	1.28264	0.310785	1.33525	1.05791	0.265541	0.305	96.5562	0.128426	96.4278
MC-27.5	1.2		29.0222	34.3131	0.659423	3.40483	0.733417	0.0232159	23.0572	0.21887	0	1.38169	0.465591	1.26146	1.23637	0.360626	0.184	96.322	0.0774769	96.2446
MC-27.5	2.1		29.0094	35.042	0.506376	2.85985	0.707592	0.0381403	22.9215	0.102998	0.266189	1.21787	0.318994	1.63979	1.22937	0.439476	0.335	96.6345	0.141058	96.4935
MC-27.5	3.1		28.926	34.1163	1.53991	2.75574	0.42094	0.0132662	23.7904	0.351909	0	1.44646	0.426889	1.0073	1.25969	0.411647	0.167	96.6334	0.0703187	96.563
MC-27.5	4.1		29.2404	35.0304	1.3094	2.01411	0.238877	0	23.8393	0.351909	0.0769261	1.03373	0.361214	1.53671	1.34717	0.271339	0.159	96.8105	0.0669501	96.7436
MC-27.5	5.1		28.098	33.3156	1.49268	3.05394	0.411901	0.00994966	24.0212	0.391964	0	1.46297	0.31313	2.15163	1.59095	0.488178	0.173	96.9752	0.0728451	96.9023
MC-27.5	6.1		28.7848	34.5133	1.44355	2.56423	0.278905	0.00331655	25.0874	0.444893	0.170947	1.29153	0.437444	1.6105	1.12206	0.326998	0.441	98.5208	0.185692	98.3351
MC-27.5	7.1		28.6543	34.1113	1.37742	2.56166	0.41061	0	25.0412	0.121595	0	0.905466	0.322513	1.40904	1.16405	0.390775	0.221	96.6909	0.0930565	96.5979
MC-43	1.1		30.1775	35.1571	1.93481	1.72748	0.178189	0	26.1914	0.171663	0	0.0850859	0.229863	1.19939	0.338251	0.0730528	0.508	97.9718	0.213904	97.7579
MC-43	3.1		28.9174	33.2739	1.06188	3.22617	0.636575	0.0348238	23.2853	0.346187	0.633725	1.65473	0.239246	1.37976	1.07657	0.344392	0.472	96.5826	0.198745	96.3839
MC-43	4.1		28.988	33.2656	0.995747	3.71459	0.606876	0.0464317	22.8739	0.188829	0	1.74743	0.18178	1.30012	1.21537	0.426721	0.621	96.1724	0.261484	95.9109
MC-43	5.1		29.878	35.6158	1.47	2.04238	0.152365	0	26.2487	0.253203	0.24421	0.123184	0.157152	0.760158	0.24494	0	0.396	97.5861	0.166744	97.4194
MC-43	6.1		30.0748	36.3364	1.42843	1.76218	0.1472	0	25.759	0.247481	0	0.120644	0.0809213	0.658257	0.388406	0.0324679	0.405	97.4412	0.170533	97.2707

## Sheet: Apatite
Electron microprobe analyses of titanite from volcanic ash beds in the Morrison Formation (wt%)
Sample	Grain	P2O5	SiO2	Fe2O3	CaO	MnO	Na2O	La2O3	Ce2O3	Nd2O3	F	Cl	Sum	-O=F,Cl	SubTotal	H2O calc	Total
LCM-1	1	41.123	0.545	0.252275	52.507	0.455	0.192	0.339	0.857	0.603	1.96	0.715	99.5483	0.986	98.56	0.64	99.2
LCM-1	1	41.057	0.563	0.382303	52.414	0.493	0.138	0.38	0.921	0.566	1.975	0.693	99.5823	0.987	98.6	0.63	99.23
LCM-1	1	40.87	0.545	0.344517	52.402	0.452	0.19	0.403	0.942	0.528	1.934	0.707	99.3175	0.973	98.34	0.65	98.99
LCM-1	2	41.673	0.305	0.306731	52.808	0.455	0.185	0.222	0.602	0.426	1.978	0.715	99.6757	0.994	98.68	0.63	99.31
LCM-1	2	41.366	0.284	0.256721	52.699	0.448	0.212	0.222	0.592	0.548	2.124	0.684	99.4357	1.048	98.39	0.57	98.96
LCM-1	2	41.541	0.554	0.23116	52.258	0.453	0.185	0.306	0.869	0.54	2.036	0.68	99.6532	1.01	98.64	0.61	99.25
LCM-1	3	41.283	0.278	0.197819	52.847	0.455	0.201	0.253	0.549	0.442	2.049	0.717	99.2718	1.024	98.25	0.59	98.84
LCM-1	3	41.564	0.25	0.151143	52.722	0.459	0.163	0.258	0.623	0.366	1.993	0.672	99.2211	0.99	98.23	0.63	98.86
LCM-1	4	41.604	0.285	0.342294	53.779	0.061	0.116	0.122	0.227	0.084	1.793	0.37	98.7833	0.838	97.95	0.81	98.76
LCM-1	4	41.949	0.257	0.328958	53.836	0.076	0.079	0.071	0.268	0.126	1.668	0.363	99.022	0.784	98.24	0.88	99.12
LCM-1	4	41.858	0.195	0.405641	53.811	0.059	0.142	0.041	0.177	0.097	1.817	0.378	98.9806	0.85	98.13	0.8	98.93
LCM-1	5	41.505	0.449	0.105578	52.722	0.432	0.179	0.22	0.674	0.494	2.021	0.677	99.4786	1.003	98.48	0.62	99.1
LCM-1	5	41.338	0.368	0.193374	52.801	0.462	0.197	0.274	0.626	0.454	2.009	0.678	99.4004	0.998	98.4	0.62	99.02
LCM-1	5	41.669	0.269	0.172258	52.785	0.465	0.168	0.182	0.548	0.393	2.141	0.63	99.4223	1.043	98.38	0.57	98.95
LCM-1	6	41.769	0.348	0.176704	52.688	0.433	0.19	0.267	0.62	0.477	1.903	0.673	99.5447	0.953	98.59	0.68	99.27
LCM-1	6	41.63	0.318	0.0922416	52.703	0.48	0.193	0.271	0.687	0.489	1.917	0.671	99.4512	0.958	98.49	0.67	99.16
LCM-1	6	41.294	0.305	0.146697	52.811	0.464	0.214	0.235	0.659	0.501	1.874	0.676	99.1797	0.941	98.24	0.69	98.93
LCM-1	7	41.766	0.33	0.235605	53.548	0.172	0.179	0.247	0.415	0.259	2.529	0.77	100.451	1.238	99.21	0.37	99.58
LCM-1	7	41.797	0.356	0.218935	53.391	0.172	0.161	0.278	0.634	0.339	2.843	0.616	100.806	1.336	99.47	0.26	99.73
LCM-1	7	41.459	0.352	0.105578	53.497	0.168	0.166	0.217	0.561	0.274	2.504	0.859	100.163	1.247	98.92	0.35	99.27
LCM-1	8	41.582	0.298	0.147809	52.868	0.417	0.166	0.184	0.568	0.37	2.093	0.689	99.3828	1.036	98.35	0.58	98.93
LCM-1	8	41.553	0.422	0.143363	52.827	0.467	0.2	0.273	0.695	0.445	1.96	0.68	99.6654	0.978	98.69	0.65	99.34
LCM-1	8	41.461	0.348	0.185595	52.959	0.461	0.163	0.255	0.602	0.37	2.05	0.66	99.5146	1.012	98.5	0.61	99.11
LCM-1	9	41.619	0.29	0.477878	53.992	0.066	0.133	0.04	0.07	0.056	1.739	0.373	98.8559	0.816	98.04	0.84	98.88
LCM-1	9	41.391	0.326	0.3723	54.059	0.086	0.177	0.029	0.069	0.073	1.83	0.36	98.7723	0.851	97.92	0.8	98.72
LCM-1	9	41.867	0.175	0.321179	53.875	0.117	0.135	0.056	0.06	0.069	1.649	0.357	98.6812	0.775	97.91	0.89	98.8
LCM-1	10	40.703	0.584	0.298952	52.258	0.466	0.144	0.414	0.892	0.584	1.889	0.665	98.898	0.945	97.95	0.67	98.62
LCM-1	10	42.032	0.032	0.336737	53.516	0.463	0.161	0.16	0.44	0.208	2.038	0.68	100.067	1.011	99.06	0.63	99.69
LCM-1	10	42.024	0.203	0.172258	53.072	0.478	0.157	0.258	0.51	0.372	2.1	0.69	100.036	1.039	99	0.59	99.59
LCM-1	11	41.065	0.175	0.477878	53.81	0.097	0.13	0.103	0.229	0.127	1.712	0.497	98.4229	0.833	97.59	0.81	98.4
LCM-1	11	41.074	0.213	0.527889	53.755	0.079	0.135	0.115	0.269	0.179	1.543	0.481	98.3709	0.758	97.61	0.9	98.51
LCM-1	11	41.774	0.155	0.674586	53.512	0.096	0.121	0.122	0.22	0.21	1.418	0.487	98.7896	0.707	98.08	0.96	99.04
LCM-1	12	41.623	0.363	0.29784	52.995	0.451	0.196	0.219	0.66	0.4	2.087	0.692	99.9838	1.034	98.95	0.59	99.54
LCM-1	12	41.817	0.288	0.151143	52.917	0.44	0.173	0.199	0.597	0.389	1.967	0.667	99.6051	0.978	98.63	0.65	99.28
LCM-1	12	41.626	0.334	0.167813	52.842	0.446	0.198	0.239	0.682	0.377	1.996	0.676	99.5838	0.992	98.59	0.63	99.22
LCM-1	13	41.161	0.156	0.298952	53.02	0.461	0.249	0.277	0.558	0.314	1.982	0.687	99.164	0.989	98.17	0.63	98.8
LCM-1	13	41.912	0.251	0.361187	53.039	0.44	0.228	0.225	0.583	0.342	2.077	0.683	100.141	1.028	99.11	0.6	99.71
LCM-1	13	41.57	0.287	0.20671	52.984	0.438	0.217	0.211	0.545	0.345	1.947	0.677	99.4277	0.972	98.46	0.66	99.12
LCM-1	14	42.093	0.176	0.218935	53.655	0.025	0.094	0.216	0.515	0.297	3.208	0.432	100.93	1.448	99.48	0.13	99.61
LCM-1	14	41.834	0.234	0.323401	53.82	0.041	0.101	0.213	0.47	0.273	3.467	0.375	101.151	1.544	99.61	0.02	99.63
LCM-1	14	42.487	0.171	0.235605	53.834	0.049	0.089	0.247	0.521	0.279	3.405	0.369	101.687	1.517	100.17	0.06	100.23
LCM-1	15	41.926	0.197	0.31451	54.096	0.15	0.107	0.156	0.251	0.115	3.01	0.914	101.237	1.473	99.76	0.11	99.87
LCM-1	15	41.743	0.251	0.323401	53.945	0.151	0.121	0.091	0.233	0.107	2.921	1.275	101.161	1.517	99.64	0.06	99.7
LCM-1	15	41.81	0.246	0.290061	54.189	0.137	0.137	0.11	0.275	0.148	3.092	0.789	101.223	1.479	99.74	0.1	99.84
LCM-6	10a	40.907	0.261	0.235605	53.395	0.159	0.215	0.214	0.582	0.331	2.142	0.563	99.0046	1.028	97.98	0.59	98.57
LCM-6	10b	41.669	0.272	0.193374	53.29	0.195	0.189	0.196	0.48	0.295	2.14	0.66	99.5794	1.049	98.53	0.57	99.1
LCM-6	1a	40.559	0.288	0.378968	54.157	0.104	0.153	0.131	0.215	0.175	3.454	0.085	99.7	1.473	98.23	0.09	98.32
LCM-6	2a	41.424	0.263	0.205599	53.484	0.179	0.131	0.17	0.443	0.324	2.041	0.69	99.3546	1.015	98.34	0.61	98.95
LCM-6	2b	41.855	0.276	0.2645	53.563	0.201	0.133	0.198	0.438	0.301	2.023	0.679	99.9315	1.004	98.93	0.63	99.56
LCM-6	3a	41.34	0.211	0.218935	54.07	0.097	0.072	0.059	0.239	0.158	2.239	0.604	99.3079	1.079	98.23	0.54	98.77
LCM-6	3b	40.76	0.192	0.278947	54.117	0.086	0.062	0.106	0.212	0.119	2.219	0.564	98.7159	1.061	97.65	0.55	98.2
LCM-6	4a	41.815	0.243	0.362298	53.97	0.045	0.145	0.019	0.078	0.102	2.166	0.32	99.2653	0.984	98.28	0.66	98.94
LCM-6	4b	41.433	0.266	0.176704	54.037	0.072	0.141	0.069	0.071	0.144	2.04	0.339	98.7887	0.935	97.85	0.7	98.55
LCM-6	8a	41.46	0.328	0.285616	53.158	0.189	0.174	0.154	0.543	0.266	2.053	0.74	99.3506	1.031	98.32	0.59	98.91
LCM-6	8b	41.282	0.371	0.252275	53.235	0.199	0.175	0.206	0.512	0.289	1.997	0.71	99.2283	1	98.23	0.62	98.85
LCM-6	9a	41.087	0.305	0.214489	53.695	0.188	0.138	0.153	0.467	0.269	2.04	0.665	99.2215	1.008	98.21	0.62	98.83
LCM-6	9b	41.166	0.332	0.20671	53.571	0.177	0.164	0.136	0.365	0.204	2.06	0.661	99.0427	1.016	98.03	0.61	98.64
LCM-9	2	41.769	0.32	0.311176	54.19	0.095	0.113	0.098	0.065	0.149	2.1	0.294	99.5042	0.95	98.55	0.7	99.25
LCM-9	2	41.139	0.306	0.332292	54.211	0.088	0.101	0.106	0.122	0.189	2.107	0.283	98.9843	0.951	98.03	0.69	98.72
LCM-9	2	41.958	0.246	0.273391	54.188	0.08	0.146	0.031	0.114	0.065	2.166	0.256	99.5234	0.969	98.55	0.68	99.23
LCM-9	4	41.313	0.408	0.448983	54.166	0.106	0.025	0.17	0.438	0.287	2.581	0.219	100.162	1.136	99.03	0.49	99.52
LCM-9	4	42.299	0.226	0.318956	54.639	0.103	0.015	0.108	0.215	0.191	2.533	0.252	100.9	1.123	99.78	0.52	100.3
LCM-9	4	41.657	0.276	0.344517	54.608	0.073	0.033	0.091	0.367	0.276	2.526	0.224	100.476	1.114	99.36	0.52	99.88
LCM-9	7	41.912	0.161	0.398973	54.749	0.062	0.055	0	0.179	0.205	2.397	0.42	100.539	1.104	99.43	0.53	99.96
LCM-9	7	41.955	0.13	0.23116	54.714	0.087	0.053	0.048	0.164	0.182	2.323	0.401	100.288	1.068	99.22	0.57	99.79
LCM-9	7	41.882	0.12	0.331181	54.819	0.09	0.028	0.036	0.165	0.164	2.389	0.422	100.446	1.101	99.35	0.54	99.89
LCM-9	8	41.438	0.252	0.433424	54.348	0.04	0.147	0	0.074	0.101	2.042	0.247	99.1224	0.915	98.21	0.74	98.95
LCM-9	8	41.648	0.281	0.303397	54.468	0.042	0.128	0.009	0.032	0	1.902	0.234	99.0474	0.853	98.19	0.81	99
LCM-9	8	41.898	0.278	0.320067	54.449	0.056	0.15	0.017	0	0.046	1.958	0.216	99.3881	0.873	98.52	0.79	99.31
LCM-9	9	41.622	0.316	0.385637	54.555	0.07	0.05	0.137	0.354	0.267	2.712	0.201	100.67	1.187	99.48	0.44	99.92
LCM-9	9	41.631	0.272	0.293395	54.548	0.079	0.046	0.129	0.339	0.225	2.65	0.203	100.415	1.161	99.25	0.46	99.71
LCM-9	9	41.588	0.309	0.315622	53.957	0.069	0.072	0.125	0.382	0.286	2.791	0.202	100.097	1.22	98.88	0.39	99.27
LCM-9	11	41.432	0.242	0.362298	54.209	0.072	0.132	0.005	0	0.084	1.608	0.233	98.3793	0.729	97.65	0.94	98.59
LCM-9	11	41.143	0.25	0.526777	54.282	0.085	0.151	0.036	0.095	0.062	1.664	0.244	98.5388	0.755	97.78	0.91	98.69
LCM-9	11	41.581	0.213	0.416754	54.194	0.086	0.101	0.048	0	0.019	1.706	0.249	98.6138	0.774	97.84	0.89	98.73
LCM-9	12	41.493	0.309	0.315622	54.65	0.056	0.134	0.024	0.143	0.061	2.19	0.353	99.7286	1.001	98.73	0.64	99.37
LCM-9	12	41.251	0.33	0.344517	54.584	0.063	0.131	0.044	0.15	0.129	2.27	0.323	99.6195	1.028	98.59	0.61	99.2
LCM-9	12	41.398	0.369	0.327847	54.334	0.069	0.136	0.046	0.158	0.13	2.182	0.384	99.5338	1.005	98.53	0.63	99.16
LCM-9	13	41.248	0.276	0.488992	54.334	0.088	0.135	0.044	0.117	0.044	1.944	0.275	98.994	0.88	98.11	0.77	98.88
LCM-9	13	41.586	0.274	0.306731	54.583	0.061	0.137	0.093	0.111	0.07	1.955	0.244	99.4207	0.878	98.54	0.78	99.32
LCM-9	13	41.9	0.168	0.366744	54.365	0.059	0.121	0.053	0.089	0.038	2.03	0.247	99.4367	0.91	98.53	0.75	99.28
LCM-9	14	41.557	0.249	0.378968	54.294	0.071	0.116	0.051	0.041	0.05	1.894	0.197	98.899	0.842	98.06	0.82	98.88
LCM-9	14	41.221	0.204	0.43787	54.412	0.118	0.095	0.034	0.04	0.068	1.803	0.22	98.6529	0.809	97.84	0.85	98.69
LCM-9	14	41.626	0.27	0.450095	54.449	0.052	0.093	0.029	0.007	0.027	1.909	0.229	99.1411	0.855	98.29	0.81	99.1
LCM-9	15	41.472	0.277	0.320067	54.333	0.079	0.092	0.031	0.077	0.077	1.928	0.256	98.9421	0.869	98.07	0.78	98.85
LCM-9	15	41.761	0.249	0.496771	54.34	0.086	0.114	0.009	0.013	0.016	1.986	0.239	99.3098	0.89	98.42	0.77	99.19
LCM-9	15	41.124	0.224	0.4212	53.972	0.104	0.113	0.093	0.028	0.102	1.923	0.263	98.3672	0.869	97.5	0.77	98.27
LCM-13	1	40.497	0.601	0.104466	52.403	0.396	0.235	0.413	0.968	0.498	2.58	0.429	99.1245	1.183	97.94	0.4	98.34
LCM-13	1	41.063	0.443	0.213378	52.55	0.386	0.237	0.391	0.907	0.571	2.351	0.445	99.5574	1.09	98.47	0.52	98.99
LCM-13	1	40.783	0.675	0.188929	51.745	0.414	0.231	0.475	1.05	0.622	2.683	0.436	99.3029	1.228	98.07	0.35	98.42
LCM-13	2	39.995	2.662	0.134473	50.986	0.292	0.258	0.358	0.754	0.566	2.22	0.461	98.6865	1.038	97.65	0.56	98.21
LCM-13	3	40.617	0.484	0.138918	52.589	0.385	0.237	0.357	0.85	0.558	2.285	0.427	98.9279	1.058	97.87	0.55	98.42
LCM-13	3	40.875	0.49	0.142252	52.517	0.412	0.209	0.341	0.849	0.584	2.296	0.407	99.1223	1.058	98.06	0.55	98.61
LCM-13	3	40.975	0.29	0.071126	53.263	0.343	0.253	0.303	0.642	0.438	2.339	0.436	99.3531	1.083	98.27	0.53	98.8
LCM-13	4	40.198	0.872	0.180038	52.1	0.351	0.19	0.511	1.093	0.716	2.452	0.44	99.103	1.131	97.97	0.46	98.43
LCM-13	4	40.47	0.802	0.237828	52.078	0.405	0.208	0.451	1.124	0.796	2.39	0.441	99.4028	1.105	98.3	0.49	98.79
LCM-13	4	40.486	0.731	0.130027	52.168	0.376	0.162	0.391	1.053	0.662	2.475	0.479	99.113	1.15	97.96	0.44	98.4
LCM-13	5	41.276	0.202	0.226714	53.316	0.368	0.283	0.234	0.555	0.357	2.406	0.387	99.6107	1.1	98.51	0.52	99.03
LCM-13	5	40.991	0.253	0.104466	53.081	0.364	0.324	0.3	0.67	0.448	2.483	0.432	99.4505	1.143	98.31	0.46	98.77
LCM-13	5	41.03	0.524	0.292284	52.618	0.385	0.227	0.358	0.857	0.57	2.492	0.428	99.7813	1.145	98.64	0.46	99.1
LCM-13	6	40.553	0.432	0.23116	53.386	0.2	0.262	0.242	0.498	0.311	2.184	0.326	98.6252	0.993	97.63	0.63	98.26
LCM-13	6	41.072	0.451	0.172258	53.175	0.228	0.253	0.224	0.562	0.418	2.288	0.334	99.1773	1.038	98.14	0.58	98.72
LCM-13	6	40.547	0.622	0.205599	52.914	0.227	0.245	0.28	0.66	0.468	2.229	0.317	98.7146	1.01	97.7	0.6	98.3
LCM-13	7	41.27	0.331	0.117803	52.903	0.393	0.247	0.269	0.714	0.426	2.351	0.433	99.4548	1.087	98.37	0.52	98.89
LCM-13	7	41.363	0.281	0.130027	53.258	0.379	0.26	0.279	0.584	0.331	2.349	0.426	99.64	1.085	98.56	0.53	99.09
LCM-13	8	40.614	0.729	0.0877962	52.254	0.374	0.175	0.475	1.054	0.763	2.479	0.421	99.4258	1.138	98.29	0.45	98.74
LCM-13	8	40.161	0.771	0.175592	52.111	0.379	0.203	0.423	1.085	0.671	2.376	0.43	98.7856	1.097	97.69	0.49	98.18
LCM-13	8	40.436	0.687	0.313399	52.174	0.385	0.184	0.451	1.065	0.715	2.416	0.412	99.2384	1.11	98.13	0.48	98.61
LCM-13	9	40.885	0.387	0.33896	53.454	0.206	0.148	0.219	0.613	0.375	2.784	0.488	99.898	1.282	98.62	0.31	98.93
LCM-13	9	40.365	0.79	0.293395	52.546	0.231	0.113	0.28	0.857	0.589	2.46	0.502	99.0264	1.149	97.88	0.44	98.32
LCM-13	9	41.35	0.459	0.180038	53.212	0.212	0.152	0.238	0.653	0.433	2.527	0.494	99.91	1.175	98.74	0.43	99.17
LCM-13	10	40.186	0.832	0.196708	52.357	0.409	0.184	0.426	1.128	0.732	2.48	0.439	99.3697	1.143	98.23	0.45	98.68
LCM-13	10	40.182	0.728	0.142252	52.346	0.391	0.178	0.408	1.161	0.755	2.478	0.401	99.1703	1.133	98.04	0.46	98.5
LCM-13	10	40.419	0.657	0.196708	52.369	0.417	0.195	0.462	1.041	0.712	2.425	0.459	99.3527	1.124	98.23	0.47	98.7
LCM-13	11	40.61	0.613	0.30562	52.405	0.378	0.194	0.442	0.983	0.647	2.396	0.443	99.4166	1.108	98.31	0.49	98.8
LCM-13	11	41.22	0.657	0.192263	52.202	0.388	0.217	0.357	1.018	0.622	2.434	0.432	99.7393	1.122	98.62	0.48	99.1
LCM-13	11	40.002	1.511	0.213378	51.837	0.384	0.256	0.337	0.932	0.539	2.373	0.4	98.7844	1.089	97.7	0.51	98.21
LCM-13	12	41.189	0.258	0.104466	53.598	0.297	0.244	0.176	0.482	0.317	3.612	0.458	100.735	1.624	99.11	0	99.11
LCM-13	12	40.81	0.348	0.137807	53.404	0.303	0.202	0.206	0.511	0.397	3.486	0.431	100.236	1.565	98.67	0	98.66
LCM-13	12	41.295	0.225	0.133361	53.627	0.296	0.21	0.18	0.413	0.386	3.572	0.444	100.781	1.604	99.18	0	99.18
LCM-13	13	40.874	0.679	0.242273	52.311	0.387	0.187	0.372	0.92	0.593	2.365	0.432	99.3623	1.093	98.27	0.51	98.78
LCM-13	13	40.644	0.701	0.32229	52.474	0.366	0.203	0.398	0.997	0.657	2.431	0.395	99.5883	1.112	98.48	0.49	98.97
LCM-13	13	40.41	0.7	0.258943	52.31	0.423	0.172	0.431	1.034	0.746	2.401	0.448	99.3339	1.112	98.22	0.48	98.7
LCM-13	14	40.8	0.509	0.217824	52.93	0.42	0.2	0.28	0.774	0.601	2.589	0.428	99.7488	1.186	98.56	0.41	98.97
LCM-13	14	40.961	0.353	0.108912	53.324	0.353	0.256	0.332	0.693	0.398	2.567	0.452	99.7979	1.182	98.62	0.42	99.04
LCM-13	14	40.666	0.39	0.238939	53.066	0.354	0.236	0.284	0.67	0.398	2.531	0.454	99.2879	1.168	98.12	0.43	98.55
LCM-13	15	40.926	0.487	0.230048	53.498	0.153	0.133	0.233	0.61	0.419	2.635	0.48	99.804	1.217	98.59	0.38	98.97
LCM-13	15	41.024	0.478	0.251164	53.462	0.152	0.166	0.21	0.597	0.39	2.772	0.446	99.9482	1.267	98.68	0.33	99.01
LCM-13	15	40.852	0.484	0.251164	53.368	0.195	0.134	0.25	0.58	0.328	2.621	0.416	99.4792	1.197	98.28	0.4	98.68
LCM-14	10a	41.569	0.118	0.381191	54.058	0.152	0.077	0.009	0.37	0.124	1.778	0.761	99.3972	0.92	98.48	0.72	99.2
LCM-14	10b	42.17	0.114	0.368966	53.972	0.182	0.088	0.126	0.163	0.102	1.917	0.734	99.937	0.972	98.96	0.67	99.63
LCM-14	10c	41.683	0.161	0.362298	53.913	0.149	0.103	0.148	0.223	0.089	1.802	0.716	99.3493	0.92	98.43	0.72	99.15
LCM-14	1b	41.881	0.115	0.328958	53.378	0.223	0.07	0.052	0.209	0.151	1.938	0.737	99.083	0.982	98.1	0.65	98.75
LCM-14	1c	42.065	0.138	0.332292	53.709	0.195	0.071	0.116	0.217	0.155	1.811	0.774	99.5833	0.937	98.65	0.71	99.36
LCM-14	2a	41.462	0.21	0.36341	53.605	0.238	0.164	0.129	0.426	0.142	2.176	0.693	99.6084	1.072	98.54	0.55	99.09
LCM-14	2b	42.198	0.206	0.388971	52.896	0.262	0.165	0.147	0.438	0.274	2.122	0.734	99.831	1.059	98.77	0.56	99.33
LCM-14	3a	41.912	0.193	0.328958	53.661	0.219	0.101	0.242	0.443	0.117	2.175	0.732	100.124	1.08	99.04	0.55	99.59
LCM-14	3b	41.605	0.27	0.386748	53.577	0.252	0.119	0.207	0.368	0.18	1.955	0.774	99.6937	0.997	98.7	0.64	99.34
LCM-14	4a	41.218	0.144	0.332292	52.839	0.249	0.098	0.177	0.356	0.234	1.925	0.8	98.3723	0.99	97.38	0.62	98
LCM-14	4b	41.669	0.098	0.353408	53.67	0.218	0.068	0.13	0.238	0.146	2.051	0.784	99.4254	1.04	98.39	0.58	98.97
LCM-14	4c	40.927	0.142	0.371189	53.35	0.301	0.102	0.139	0.373	0.111	2.074	0.763	98.6532	1.045	97.61	0.56	98.17
LCM-14	5a	42.086	0.154	0.453429	53.629	0.103	0.078	0.204	0.202	0.07	2.204	0.495	99.6784	1.039	98.64	0.59	99.23
LCM-14	5b	42.106	0.137	0.386748	53.825	0.105	0.075	0.121	0.309	0.101	1.974	0.482	99.6217	0.94	98.68	0.71	99.39
LCM-14	5c	41.607	0.152	0.416754	54.139	0.132	0.03	0.017	0.361	0.184	2.121	0.469	99.6288	0.998	98.63	0.64	99.27
LCM-14	6a	41.716	0.315	0.424534	53.37	0.206	0.078	0.368	0.495	0.212	2.059	0.697	99.9405	1.024	98.92	0.6	99.52
LCM-14	6b	40.631	0.323	0.431202	53.464	0.207	0.109	0.283	0.462	0.277	2.196	0.809	99.1922	1.107	98.09	0.5	98.59
LCM-14	8a	41.501	0.324	0.386748	53.72	0.238	0.083	0.316	0.622	0.196	1.82	0.744	99.9507	0.934	99.02	0.71	99.73
LCM-14	8b	41.205	0.192	0.346739	53.205	0.229	0.073	0.182	0.433	0.108	1.843	0.729	98.5457	0.94	97.61	0.68	98.29
LCM-14	9a	40.98	0.131	0.467876	53.934	0.081	0.093	0.035	0.239	0.13	1.857	0.369	98.3169	0.865	97.45	0.77	98.22
LCM-14	9b	41.656	0.21	0.546781	54.185	0.099	0.112	0.104	0.079	0.07	2.08	0.425	99.5668	0.971	98.6	0.67	99.27
LCM-16	10a	41.04	0.478	0.402307	53.32	0.236	0.134	0.246	0.617	0.24	4.061	0.396	101.17	1.799	99.37	0	99.37
LCM-16	10b	41.339	0.53	0.411197	53.231	0.291	0.113	0.255	0.584	0.451	4.204	0.373	101.782	1.854	99.93	0	99.93
LCM-16	11a	41.783	0.286	0.625687	54.331	0.13	0.149	0.131	0.244	0.134	2.351	0.324	100.489	1.063	99.43	0.58	100.01
LCM-16	11b	41.163	0.285	0.566786	54.372	0.143	0.132	0.052	0.274	0.044	2.238	0.33	99.5998	1.016	98.58	0.62	99.2
LCM-16	12a	41.427	0.287	0.629021	54.012	0.033	0.146	0.121	0.194	0.143	2.752	0.471	100.215	1.265	98.95	0.34	99.29
LCM-16	12b	41.299	0.279	0.660139	54.029	0.093	0.2	0.052	0.278	0.193	2.895	0.455	100.433	1.321	99.11	0.28	99.39
LCM-16	13a	41.417	0.287	0.353408	54.047	0.203	0.152	0.139	0.321	0.206	2.159	0.667	99.9514	1.059	98.89	0.57	99.46
LCM-16	13b	40.809	0.27	0.342294	53.774	0.205	0.197	0.16	0.452	0.279	2.422	0.727	99.6373	1.183	98.45	0.42	98.87
LCM-16	1a	41.286	0.315	0.683477	54.035	0.052	0.154	0.151	0.075	0.104	2.138	0.311	99.3045	0.97	98.33	0.67	99
LCM-16	1b	41.234	0.269	0.564563	55.116	0.055	0.127	0.056	0	0.104	2.076	0.27	99.8716	0.935	98.94	0.73	99.67
LCM-16	1c	41.385	0.286	0.76016	54.084	0.091	0.152	0.048	0.119	0.032	2.096	0.29	99.3432	0.948	98.4	0.7	99.1
LCM-16	2a	41.857	0.336	0.337849	53.565	0.254	0.106	0.194	0.443	0.218	2.583	0.621	100.515	1.227	99.29	0.38	99.67
LCM-16	2b	41.939	0.346	0.385637	53.17	0.206	0.09	0.147	0.281	0.231	2.415	0.639	99.8496	1.16	98.69	0.45	99.14
LCM-16	2c	41.262	0.289	0.344517	53.56	0.189	0.121	0.16	0.514	0.373	2.491	0.668	99.9715	1.199	98.77	0.4	99.17
LCM-16	3a	40.547	0.545	0.463431	52.769	0.192	0.238	0.246	0.542	0.48	2.473	0.363	98.8584	1.123	97.74	0.47	98.21
LCM-16	3b	40.745	0.477	0.460097	52.806	0.257	0.174	0.32	0.526	0.458	2.338	0.322	98.8831	1.057	97.83	0.55	98.38
LCM-16	4a	41.389	0.237	0.69459	53.801	0.082	0.125	0.009	0.083	0.07	1.932	0.306	98.7286	0.882	97.85	0.76	98.61
LCM-16	4b	41.741	0.398	0.806836	54.152	0.057	0.106	0.095	0.171	0.051	2.178	0.218	99.9738	0.966	99.01	0.69	99.7
LCM-16	4c	41.236	0.379	0.875739	53.65	0.059	0.112	0.017	0.107	0.029	2.123	0.275	98.8627	0.956	97.91	0.68	98.59
LCM-16	5a	41.201	0.28	0.741267	54.44	0.063	0.139	0.117	0	0.016	1.858	0.199	99.0543	0.827	98.23	0.84	99.07
LCM-16	5b	41.332	0.241	0.729042	54.377	0.037	0.148	0.052	0.04	0.032	2.014	0.275	99.277	0.91	98.37	0.74	99.11
LCM-16	6a	40.729	0.259	0.789055	53.821	0.064	0.116	0.052	0.064	0.006	1.983	0.263	98.1461	0.894	97.25	0.74	97.99
LCM-16	7a	41.822	0.223	0.713483	54.562	0.022	0.156	0	0	0.041	2.295	0.233	100.067	1.019	99.05	0.63	99.68
LCM-16	7b	41.724	0.263	0.593458	54.373	0.034	0.161	0	0.123	0.003	2.311	0.271	99.8565	1.034	98.82	0.61	99.43
LCM-16	7c	41.459	0.24	0.674586	54.221	0.031	0.131	0.056	0.052	0	2.306	0.261	99.4316	1.03	98.4	0.61	99.01
LCM-17	10a	40.925	0.857	0.374523	53.138	0.048	0.056	0.293	0.817	0.454	2.638	0.482	100.083	1.219	98.86	0.38	99.24
LCM-17	10b	40.828	0.714	0.416754	53.503	0.076	0.085	0.219	0.685	0.301	2.707	0.464	99.9988	1.244	98.75	0.35	99.1
LCM-17	10c	40.664	1.176	0.336737	53.116	0.129	0.077	0.359	0.713	0.435	2.658	0.565	100.229	1.246	98.98	0.35	99.33
LCM-17	1a	42.396	0.292	0.0722374	54.954	0.033	0.101	0.013	0.124	0.118	3.312	0.099	101.514	1.417	100.1	0.19	100.29
LCM-17	1b	41.361	0.352	0.0533445	54.433	0	0.096	0.039	0.152	0.083	3.154	0.099	99.8223	1.35	98.47	0.24	98.71
LCM-17	1c	41.955	0.248	0.171147	53.919	0.096	0.098	0.013	0.12	0.086	3.255	0.102	100.063	1.393	98.67	0.19	98.86
LCM-17	2a	41.596	0.388	0.41342	54.24	0.136	0.128	0.224	0.277	0.199	2.73	0.54	100.871	1.271	99.6	0.34	99.94
LCM-17	2b	40.568	0.401	0.433424	54.061	0.136	0.117	0.079	0.5	0.201	2.654	0.512	99.6624	1.233	98.43	0.37	98.8
LCM-17	2b	41.906	0.356	0.382303	53.601	0.096	0.12	0.162	0.444	0.262	2.579	0.501	100.409	1.198	99.21	0.41	99.62
LCM-17	3a	41.215	0.397	0.41342	53.801	0.115	0.073	0.175	0.373	0.198	2.504	0.502	99.7664	1.167	98.6	0.44	99.04
LCM-17	3b	42.133	0.221	0.386748	54.001	0.105	0.098	0.039	0.352	0.179	2.56	0.511	100.586	1.193	99.39	0.43	99.82
LCM-17	4a	41.831	0.173	0.427868	54.531	0.135	0.154	0.123	0.18	0.195	2.465	0.49	100.705	1.148	99.56	0.49	100.05
LCM-17	4b	41.817	0.269	0.415643	54.447	0.11	0.147	0.079	0.293	0.214	2.768	0.486	101.046	1.275	99.77	0.34	100.11
LCM-17	5a	40.922	0.318	0.414531	54.008	0.068	0.123	0.083	0.393	0.141	2.435	0.494	99.3995	1.136	98.26	0.47	98.73
LCM-17	5b	41.316	0.303	0.408975	54.238	0.07	0.179	0.184	0.301	0.199	2.533	0.496	100.228	1.178	99.05	0.44	99.49
LCM-17	6a	41.349	0.232	0.535668	53.597	0.187	0.179	0.193	0.257	0.106	2.461	0.492	99.5887	1.147	98.44	0.46	98.9
LCM-17	6b	41.578	0.253	0.442315	54.132	0.133	0.167	0.101	0.149	0.16	2.535	0.532	100.182	1.187	99	0.43	99.43
LCM-17	6c	42.057	0.259	0.376746	53.699	0.106	0.159	0.149	0.385	0.163	2.653	0.49	100.497	1.227	99.27	0.39	99.66
LCM-17	7a	41.154	0.309	0.447872	54.147	0.14	0.183	0.061	0.317	0.164	2.622	0.533	100.078	1.224	98.85	0.39	99.24
LCM-17	7b	41.758	0.261	0.431202	53.945	0.098	0.154	0.097	0.422	0.209	2.517	0.541	100.433	1.181	99.25	0.44	99.69
LCM-17	8a	41.789	0.101	0.518998	54.167	0.059	0.104	0.066	0.129	0.145	2.222	0.49	99.791	1.046	98.74	0.59	99.33
LCM-17	8b	41.902	0.238	0.587901	53.747	0.076	0.11	0.083	0.289	0.151	2.133	0.467	99.7839	1.003	98.78	0.63	99.41
LCM-17	8c	42.434	0.189	0.533445	54.04	0.053	0.072	0.101	0.209	0.138	2.157	0.46	100.386	1.012	99.37	0.64	100.01
LCM-17	9a	41.481	0.45	0.39675	53.018	0.03	0.105	0.228	0.434	0.334	2.416	0.472	99.3647	1.123	98.24	0.48	98.72
LCM-17	9b	41.484	0.29	0.385637	53.534	0.086	0.166	0.228	0.285	0.189	2.491	0.521	99.6596	1.166	98.49	0.44	98.93
LCM-18	10a	41.253	0.359	0.551227	53.962	0.146	0.165	0.091	0.294	0.133	1.85	0.922	99.7262	0.986	98.74	0.65	99.39
LCM-18	10b	41.636	0.253	0.422311	53.741	0.128	0.181	0.069	0.314	0.064	1.967	0.931	99.7063	1.038	98.67	0.59	99.26
LCM-18	10c	41.688	0.277	0.525666	54.102	0.136	0.148	0.161	0.282	0.136	1.844	0.989	100.289	0.999	99.29	0.65	99.94
LCM-18	1a	41.282	0.3	0.541225	54.104	0.062	0.022	0.104	0.416	0.184	2.346	0.295	99.6562	1.054	98.6	0.57	99.17
LCM-18	1b	41.544	0.282	0.473433	54.497	0.018	0.038	0.148	0.266	0.251	2.118	0.356	99.9914	0.972	99.02	0.68	99.7
LCM-18	2a	42.243	0.18	0.348962	54.539	0.059	0.093	0.14	0.22	0.106	2.739	0.429	101.097	1.25	99.85	0.37	100.22
LCM-18	2b	42.199	0.171	0.404529	54.194	0.024	0.094	0.052	0.199	0.121	2.924	0.475	100.858	1.338	99.52	0.27	99.79
LCM-18	2c	42.019	0.171	0.412309	54.413	0.051	0.087	0.087	0.203	0.083	2.637	0.484	100.647	1.219	99.43	0.4	99.83
LCM-18	3a	41.528	0.325	0.433424	53.662	0.22	0.041	0.238	0.555	0.269	2.766	0.416	100.453	1.258	99.2	0.34	99.54
LCM-18	3b	41.448	0.226	0.30562	53.804	0.127	0.066	0.247	0.441	0.159	2.811	0.44	100.075	1.282	98.79	0.31	99.1
LCM-18	4a	42.247	0.13	0.467876	53.801	0.088	0.038	0.043	0.099	0.079	2.633	0.346	99.9719	1.186	98.79	0.43	99.22
LCM-18	4b	42.587	0.17	0.441204	54.334	0.058	0.019	0.048	0.195	0.048	2.684	0.352	100.936	1.209	99.73	0.42	100.15
LCM-18	4c	41.617	0.159	0.502328	54.13	0.058	0.021	0.165	0.231	0.146	2.6	0.304	99.9333	1.163	98.77	0.45	99.22
LCM-18	6a	41.736	0.274	0.477878	54.319	0.086	0.044	0.152	0.377	0.105	3.087	0.433	101.091	1.397	99.69	0.2	99.89
LCM-18	6b	42.214	0.26	0.407863	54.103	0.076	0.038	0.23	0.262	0.181	3.366	0.247	101.385	1.473	99.91	0.11	100.02
LCM-18	6c	42.013	0.235	0.494548	54.134	0.075	0.045	0.156	0.417	0.27	2.839	0.371	101.05	1.279	99.77	0.33	100.1
LCM-18	6d	42.233	0.257	0.444538	53.603	0.044	0.05	0	0.398	0.201	3.01	0.334	100.575	1.342	99.23	0.25	99.48
LCM-18	7a	42.201	0.266	0.484546	54.344	0.067	0.075	0.082	0.213	0.139	2.723	0.489	101.084	1.256	99.83	0.36	100.19
LCM-18	7b	41.767	0.334	0.435647	54.402	0.063	0.055	0.151	0.352	0.312	2.818	0.443	101.133	1.286	99.85	0.33	100.18
LCM-18	7c	41.975	0.338	0.474544	53.726	0.057	0.066	0.181	0.371	0.306	2.663	0.492	100.65	1.232	99.42	0.38	99.8
LCM-18	8a	42.109	0.303	0.306731	54.346	0.165	0.064	0.139	0.51	0.309	2.634	0.382	101.268	1.195	100.07	0.43	100.5
LCM-18	8b	41.993	0.348	0.311176	54.363	0.151	0.035	0.147	0.376	0.366	2.596	0.421	101.107	1.188	99.92	0.44	100.36
LCM-18	8c	41.932	0.252	0.237828	54.44	0.118	0.054	0.19	0.384	0.297	2.671	0.379	100.955	1.21	99.74	0.41	100.15
LCM-18	9a	42.442	0.129	0.606794	54.387	0.115	0.012	0.043	0.194	0.07	1.669	0.5	100.168	0.815	99.35	0.86	100.21
LCM-18	9b	42.499	0.113	0.643468	54.649	0.109	0.011	0.078	0.131	0.006	1.797	0.472	100.508	0.863	99.65	0.81	100.46
LCM-18	9c	42.253	0.146	0.822395	54.108	0.062	0.023	0.004	0.127	0.2	1.83	0.475	100.05	0.877	99.17	0.79	99.96
LCM-19	1a	41.753	0.158	0.44676	54.086	0.038	0.06	0.087	0.207	0.086	2.424	0.427	99.7728	1.117	98.66	0.5	99.16
LCM-19	1b	42.239	0.278	0.563452	53.757	0.087	0.041	0.048	0.266	0.229	2.136	0.343	99.9875	0.976	99.01	0.67	99.68
LCM-19	2a	41.819	0.186	0.739044	54.216	0.108	0.019	0.061	0.092	0.048	1.862	0.182	99.332	0.825	98.51	0.84	99.35
LCM-19	2b	42.19	0.195	0.665695	54.269	0.114	0.004	0	0.036	0.095	1.807	0.185	99.5607	0.802	98.76	0.87	99.63
LCM-19	2c	41.791	0.19	0.656805	54.25	0.059	0.025	0.122	0.151	0.127	1.891	0.214	99.4768	0.844	98.63	0.82	99.45
LCM-19	3a	41.774	0.201	0.417866	54.403	0.057	0.114	0.174	0.223	0.08	2.596	0.403	100.443	1.184	99.26	0.44	99.7
LCM-19	3b	41.542	0.199	0.287838	54.033	0.04	0.118	0.074	0.307	0.105	2.762	0.4	99.8678	1.253	98.61	0.35	98.96
LCM-19	3c	42.1	0.187	0.317845	54.48	0.018	0.112	0.083	0.115	0.153	2.702	0.406	100.674	1.229	99.44	0.39	99.83
LCM-19	4a	42.103	0.224	0.323401	54.097	0.086	0.027	0.109	0.362	0.194	2.363	0.499	100.387	1.107	99.28	0.52	99.8
LCM-19	4b	41.637	0.199	0.432313	53.956	0.16	0.062	0.13	0.318	0.229	2.358	0.538	100.019	1.114	98.91	0.51	99.42
LCM-19	4c	42.029	0.219	0.473433	53.786	0.15	0.082	0.113	0.298	0.254	2.242	0.558	100.204	1.069	99.14	0.56	99.7
LCM-19	6a	41.868	0.174	0.530111	54.987	0.052	0.016	0	0.108	0.022	2.251	0.351	100.359	1.027	99.33	0.62	99.95
LCM-19	6b	42.292	0.19	0.496771	54.694	0.093	0.013	0	0.195	0.051	2.207	0.305	100.537	0.998	99.54	0.66	100.2
LCM-20	7	42.116	0.165	0.232271	54.285	0.089	0.053	0.045	0.284	0.14	2.402	0.408	100.219	1.103	99.12	0.53	99.65
LCM-20	7	42.258	0.158	0.321179	54.403	0.074	0.06	0.086	0.195	0.172	2.516	0.431	100.674	1.156	99.52	0.47	99.99
LCM-20	7	42.109	0.196	0.307842	54.431	0.103	0.058	0.084	0.2	0.055	2.523	0.413	100.48	1.155	99.32	0.47	99.79
LCM-20	8	41.021	0.288	0.117803	53.104	0.156	0.131	0.18	0.399	0.162	1.427	2.159	99.1448	1.087	98.06	0.51	98.57
LCM-20	8	41.635	0.281	0.332292	53.215	0.153	0.096	0.201	0.513	0.293	1.475	2.161	100.355	1.107	99.25	0.5	99.75
LCM-20	8	41.371	0.277	0.211155	53.245	0.157	0.083	0.174	0.394	0.188	1.396	2.166	99.6622	1.075	98.59	0.53	99.12
LCM-20	10	42.439	0.225	0.270057	54.009	0.106	0.052	0.071	0.195	0.218	2.516	0.408	100.509	1.151	99.36	0.48	99.84
LCM-20	10	42.291	0.283	0.401195	53.855	0.084	0.046	0.141	0.252	0.152	2.557	0.41	100.472	1.169	99.3	0.45	99.75
LCM-20	10	42.318	0.233	0.295618	53.867	0.089	0.021	0.141	0.235	0.252	2.395	0.416	100.263	1.102	99.16	0.53	99.69
LCM-20	12	42.389	0.217	0.110023	53.778	0.057	0.082	0.206	0.53	0.358	3.736	0.028	101.491	1.579	99.91	0	99.9
LCM-20	12	42.227	0.22	0.244496	53.845	0.067	0.063	0.162	0.425	0.268	3.702	0.072	101.295	1.575	99.72	0	99.71
LCM-20	12	42.48	0.225	0.298952	53.934	0.069	0.039	0.17	0.477	0.271	3.699	0.052	101.715	1.569	100.15	0.01	100.16
LCM-20	14	42.254	0.127	0.493437	53.646	0.123	0.062	0.141	0.26	0.134	2.029	0.657	99.9264	1.002	98.92	0.64	99.56
LCM-20	14	42.366	0.117	0.350074	53.629	0.076	0.08	0.111	0.258	0.158	2.251	0.859	100.255	1.141	99.11	0.48	99.59
LCM-20	14	42.348	0.142	0.497882	53.846	0.093	0.072	0.103	0.274	0.129	2.164	0.798	100.467	1.091	99.38	0.54	99.92
LCM-21	1a	41.396	0.195	0.518998	54.065	0.098	0.028	0	0.115	0.153	2.292	0.591	99.452	1.098	98.35	0.52	98.87
LCM-21	1b	41.567	0.192	0.35563	54.297	0.042	0.052	0.078	0.254	0.121	2.195	0.584	99.7376	1.055	98.68	0.57	99.25
LCM-21	1c	41.487	0.233	0.448983	53.872	0.016	0.024	0.104	0.234	0.213	2.422	0.603	99.657	1.155	98.5	0.45	98.95
LCM-21	4a	41.123	0.139	0.621242	54.259	0.046	0.023	0	0	0.006	1.773	0.339	98.3292	0.823	97.51	0.83	98.34
LCM-21	4b	41.868	0.082	0.693479	53.968	0.096	0.042	0.009	0	0.134	1.635	0.361	98.8885	0.77	98.12	0.89	99.01
LCM-21	4c	41.857	0.105	0.641246	53.817	0.033	0.042	0	0.127	0.111	1.728	0.312	98.7732	0.798	97.98	0.86	98.84
LCM-21	5a	40.694	0.581	0.357853	52.962	0.308	0.163	0.377	0.84	0.469	2.631	0.413	99.7959	1.201	98.59	0.39	98.98
LCM-21	5b	40.858	0.407	0.383414	52.89	0.338	0.136	0.299	0.73	0.431	2.554	0.426	99.4524	1.171	98.28	0.42	98.7
LCM-22	1a	41.624	0.255	0.643468	54.808	0.056	0.1	0.017	0.06	0.08	2.677	0.212	100.532	1.175	99.36	0.46	99.82
LCM-22	1b	41.87	0.269	0.675697	54.373	0.071	0.162	0.104	0	0.083	3.788	0.053	101.449	1.607	99.84	0	99.84
LCM-22	2a	41.623	0.241	0.515664	53.429	0.087	0.176	0.131	0.299	0.134	2.688	0.397	99.7207	1.221	98.5	0.38	98.88
LCM-22	2b	41.575	0.307	0.448983	53.493	0.104	0.142	0.139	0.271	0.14	2.813	0.364	99.797	1.266	98.53	0.33	98.86
LCM-22	2c	41.466	0.25	0.600126	53.772	0.126	0.179	0.144	0.331	0.089	2.801	0.413	100.171	1.272	98.9	0.33	99.23
LCM-22	3a	40.602	0.586	0.334515	52.903	0.247	0.178	0.325	0.834	0.594	2.142	0.625	99.3705	1.042	98.33	0.57	98.9
LCM-22	3b	41.052	0.627	0.36341	52.904	0.279	0.118	0.36	0.783	0.413	2.155	0.644	99.6984	1.052	98.65	0.56	99.21
LCM-22	4a	40.872	0.335	0.789055	53.279	0.304	0.314	0.217	0.708	0.216	2.159	0.951	100.144	1.123	99.02	0.5	99.52
LCM-22	4b	41.644	0.206	0.749046	53.158	0.307	0.262	0.234	0.552	0.222	2.045	0.808	100.187	1.043	99.14	0.59	99.73
LCM-22	4c	41.397	0.154	0.787943	52.929	0.271	0.228	0.187	0.43	0.181	2.29	0.838	99.6929	1.153	98.54	0.45	98.99
LCM-22	5a	41.258	0.322	0.384525	53.487	0.242	0.233	0.204	0.53	0.181	2.183	0.666	99.6905	1.069	98.62	0.55	99.17
LCM-22	5b	41.629	0.223	0.294506	53.747	0.205	0.192	0.178	0.545	0.216	2.202	0.673	100.105	1.078	99.03	0.55	99.58
LCM-22	6a	41.245	0.273	0.524555	54.426	0.045	0.143	0.004	0.183	0.143	2.55	0.464	100.001	1.178	98.82	0.44	99.26
LCM-22	6b	41.708	0.278	0.529	54.213	0.076	0.126	0.148	0.275	0.179	2.679	0.422	100.633	1.223	99.41	0.4	99.81
LCM-22	7a	41.182	0.308	0.574565	54.39	0.254	0.261	0.136	0.33	0.119	2.048	0.916	100.519	1.068	99.45	0.57	100.02
LCM-22	7b	41.596	0.246	0.445649	54.14	0.233	0.217	0.135	0.351	0.178	1.967	0.775	100.284	1.002	99.28	0.64	99.92
LCM-22	8a	41.471	0.261	0.382303	53.906	0.147	0.252	0.126	0.486	0.274	2.266	0.936	100.507	1.165	99.34	0.45	99.79
LCM-22	8c	41.21	0.257	0.35563	53.685	0.145	0.306	0.304	0.628	0.207	2.241	0.951	100.29	1.157	99.13	0.46	99.59
LCM-23	2a	41.813	0.387	0.324513	53.914	0.182	0.075	0.247	0.361	0.174	2.611	0.603	100.692	1.235	99.46	0.38	99.84
LCM-23	2b	41.861	0.279	0.198931	54.317	0.115	0.084	0.147	0.476	0.111	2.932	0.491	101.012	1.345	99.67	0.26	99.93
LCM-23	2c	42.11	0.249	0.287838	54.51	0.154	0.081	0.117	0.429	0.162	2.811	0.555	101.466	1.308	100.16	0.31	100.47
LCM-23	3a	41.734	0.378	0.353408	52.89	0.217	0.195	0.303	0.678	0.203	2.387	0.45	99.7884	1.106	98.68	0.51	99.19
LCM-23	3b	41.578	0.194	0.345628	53.838	0.213	0.231	0.1	0.481	0.19	2.362	0.49	100.023	1.105	98.92	0.52	99.44
LCM-23	3c	41.199	0.383	0.3723	53.299	0.175	0.177	0.234	0.761	0.288	2.392	0.467	99.7473	1.112	98.64	0.5	99.14
LCM-23	4a	42.055	0.177	0.0811281	54.996	0.06	0.024	0.022	0.131	0.057	3.443	0	101.046	1.45	99.6	0.15	99.75
LCM-23	4b	42.734	0.11	0.0622353	55.561	0.075	0.036	0	0.191	0.07	3.27	0.035	102.144	1.385	100.76	0.24	101
LCM-23	5a	41.878	0.482	0.146697	53.955	0.067	0.062	0.39	0.689	0.415	2.385	0.804	101.274	1.185	100.09	0.44	100.53
LCM-23	5b	41.948	0.278	0.204487	54.332	0.177	0.094	0.187	0.235	0.127	2.15	0.808	100.54	1.087	99.45	0.55	100
LCM-23	5c	41.882	0.277	0.205599	54.977	0.162	0.087	0.278	0.37	0.108	2.31	0.83	101.487	1.159	100.33	0.48	100.81
LCM-25	1a	41.717	0.323	0.411197	54.586	0.062	0.221	0.242	0.396	0.199	2.874	0.431	101.462	1.307	100.16	0.31	100.47
LCM-25	1b	41.518	0.337	0.518998	54.604	0.093	0.174	0.138	0.427	0.237	2.959	0.447	101.453	1.346	100.11	0.27	100.38
LCM-25	1c	40.934	0.232	0.441204	54.29	0.117	0.175	0.199	0.562	0.24	2.946	0.42	100.556	1.335	99.22	0.26	99.48
LCM-25	2a	41.113	0.299	0.33896	53.963	0.245	0.243	0.199	0.586	0.398	2.753	0.59	100.728	1.292	99.44	0.31	99.75
LCM-25	2b	41.708	0.257	0.417866	53.52	0.253	0.21	0.212	0.522	0.285	2.781	0.532	100.698	1.291	99.41	0.31	99.72
LCM-25	2c	41.58	0.255	0.535668	53.636	0.336	0.218	0.341	0.518	0.316	2.854	0.493	101.083	1.312	99.77	0.29	100.06
LCM-25	3a	41.109	0.793	0.267834	54.056	0.168	0.123	0.355	0.874	0.448	2.97	0.518	101.682	1.367	100.31	0.23	100.54
LCM-25	3b	40.51	0.864	0.262277	52.965	0.187	0.136	0.328	1.003	0.65	2.685	0.466	100.056	1.235	98.82	0.36	99.18
LCM-25	4a	41.224	0.184	0.320067	53.923	0.181	0.201	0.307	0.598	0.338	2.725	0.518	100.519	1.264	99.26	0.34	99.6
LCM-25	4b	41.159	0.179	0.330069	53.263	0.161	0.248	0.216	0.583	0.31	2.732	0.517	99.6981	1.266	98.43	0.32	98.75
LCM-25	5b	42.588	0.216	0.391193	54.196	0.074	0.061	0.113	0.23	0.162	2.491	0.766	101.288	1.221	100.07	0.4	100.47
LCM-25	5b	42.551	0.289	0.418977	54.561	0.085	0.053	0.122	0.244	0.141	2.311	0.833	101.609	1.16	100.45	0.48	100.93
LCM-25	6a	41.812	0.231	0.640134	54.234	0.258	0.173	0.004	0.25	0.215	2.488	0.496	100.801	1.159	99.64	0.47	100.11
LCM-25	6b	41.858	0.193	0.715706	53.746	0.213	0.095	0.1	0.25	0.174	2.29	0.481	100.116	1.072	99.04	0.56	99.6
LCM-25	6c	42.118	0.153	0.537891	53.804	0.229	0.169	0.082	0.254	0.203	2.229	0.499	100.278	1.051	99.23	0.59	99.82
LCM-26	1	40.844	0.64	0.151143	52.79	0.345	0.183	0.354	0.826	0	2.428	0.318	98.8791	1.094	97.79	0.51	98.3
LCM-26	1	40.79	0.284	0.155588	53.157	0.315	0.318	0.2	0.524	0.991	2.537	0.329	99.6006	1.142	98.46	0.46	98.92
LCM-26	1	41.174	0.228	0.101132	53.386	0.348	0.305	0.218	0.524	0.355	2.741	0.329	99.7091	1.228	98.48	0.37	98.85
LCM-26	2	41.284	0.34	0.197819	54.076	0.079	0.151	0.008	0.073	0.091	2.255	0.27	98.8248	1.01	97.81	0.62	98.43
LCM-26	2	41.55	0.283	0.353408	54.056	0.127	0.158	0.005	0.057	0.101	2.108	0.234	99.0324	0.94	98.09	0.7	98.79
LCM-26	2	41.055	0.53	0.291172	53.872	0.118	0.173	0.054	0.008	0.048	2.014	0.245	98.4082	0.903	97.51	0.74	98.25
LCM-26	3	41.411	0.254	0.0800168	53.693	0.3	0.235	0.168	0.455	0.309	2.61	0.356	99.871	1.179	98.69	0.43	99.12
LCM-26	3	40.906	0.263	0.193374	53.682	0.29	0.241	0.136	0.431	0.31	2.457	0.386	99.2954	1.121	98.17	0.49	98.66
LCM-26	3	40.894	0.501	0.217824	53.292	0.267	0.148	0.274	0.698	0.528	2.683	0.342	99.8448	1.206	98.64	0.39	99.03
LCM-26	4	41.478	0.332	0.374523	53.74	0.052	0.08	0.045	0.147	0.078	2.333	0.268	98.9275	1.042	97.89	0.58	98.47
LCM-26	4	41.314	0.279	0.395639	53.973	0.053	0.07	0.04	0.094	0.123	2.268	0.283	98.8926	1.019	97.87	0.61	98.48
LCM-26	4	41.42	0.251	0.4212	53.812	0.074	0.104	0.014	0.075	0.028	2.343	0.267	98.8092	1.046	97.76	0.58	98.34
LCM-26	5	40.482	0.221	0.261166	53.338	0.321	0.291	0.147	0.439	0.325	2.677	0.345	98.8472	1.205	97.64	0.39	98.03
LCM-26	5	40.882	0.227	0.167813	53.532	0.317	0.242	0.171	0.373	0.325	2.495	0.35	99.0818	1.129	97.95	0.48	98.43
LCM-26	6	40.681	0.374	0.125582	53.334	0.282	0.226	0.256	0.599	0.441	2.744	0.381	99.4436	1.241	98.2	0.35	98.55
LCM-26	6	41.032	0.326	0.0800168	53.63	0.238	0.163	0.223	0.499	0.389	2.69	0.34	99.61	1.209	98.4	0.39	98.79
LCM-26	6	40.52	0.367	0.108912	53.36	0.257	0.201	0.207	0.61	0.431	2.614	0.354	99.0299	1.18	97.85	0.41	98.26
LCM-26	7	41.235	0.283	0.130027	53.637	0.18	0.242	0.201	0.388	0.236	2.434	0.494	99.46	1.136	98.32	0.48	98.8
LCM-26	7	41.622	0.21	0.071126	53.968	0.18	0.231	0.151	0.38	0.25	2.498	0.491	100.052	1.162	98.89	0.46	99.35
LCM-26	7	41.721	0.245	0.096687	53.948	0.209	0.205	0.095	0.411	0.279	2.363	0.483	100.056	1.103	98.95	0.52	99.47
LCM-26	8	40.869	0.587	0.0633466	53.041	0.281	0.145	0.267	0.774	0.59	2.711	0.355	99.6833	1.221	98.46	0.37	98.83
LCM-26	8	41.681	0.143	0.096687	53.844	0.257	0.166	0.18	0.351	0.326	2.589	0.354	99.9877	1.17	98.82	0.44	99.26
LCM-26	8	40.945	0.731	0.172258	52.99	0.29	0.129	0.281	0.932	0.648	2.651	0.362	100.131	1.198	98.93	0.4	99.33
LCM-26	9	40.612	0.652	0.0211155	52.998	0.282	0.156	0.289	0.722	0.575	2.503	0.342	99.1521	1.131	98.02	0.47	98.49
LCM-26	9	40.64	0.609	0.146697	53.179	0.254	0.172	0.264	0.673	0.485	2.643	0.354	99.4197	1.192	98.23	0.4	98.63
LCM-26	9	40.772	0.622	0.130027	53.182	0.278	0.119	0.255	0.75	0.544	2.595	0.356	99.603	1.173	98.43	0.43	98.86
LCM-26	10	40.423	0.684	0.122248	52.965	0.279	0.152	0.258	0.803	0.631	2.62	0.363	99.3002	1.185	98.12	0.41	98.53
LCM-26	10	40.303	0.557	0.188929	52.915	0.311	0.142	0.319	0.812	0.629	2.609	0.345	99.1309	1.176	97.95	0.41	98.36
LCM-26	10	40.257	0.595	0.184483	52.929	0.269	0.14	0.263	0.786	0.571	2.486	0.372	98.8525	1.13	97.72	0.46	98.18
LCM-26	11	40.571	0.68	0.138918	52.79	0.312	0.119	0.266	0.811	0.514	2.667	0.322	99.1909	1.195	98	0.39	98.39
LCM-26	11	40.232	0.726	0.28117	52.684	0.294	0.132	0.314	0.843	0.585	2.638	0.37	99.0992	1.194	97.91	0.39	98.3
LCM-26	11	40.584	0.668	0.193374	52.666	0.318	0.129	0.349	0.887	0.657	2.545	0.346	99.3424	1.149	98.19	0.44	98.63
LCM-26	12	40.521	0.6	0.180038	53.307	0.276	0.147	0.252	0.776	0.559	2.621	0.33	99.569	1.178	98.39	0.42	98.81
LCM-26	12	40.645	0.604	0.0633466	53.147	0.316	0.172	0.291	0.748	0.578	2.41	0.357	99.3313	1.095	98.24	0.51	98.75
LCM-26	12	40.986	0.601	0.213378	53.188	0.274	0.151	0.302	0.717	0.447	2.578	0.336	99.7934	1.161	98.63	0.44	99.07
LCM-26	13	40.871	0.749	0.196708	52.658	0.287	0.153	0.329	0.858	0.653	2.895	0.327	99.9767	1.292	98.68	0.29	98.97
LCM-26	13	40.615	0.75	0.096687	52.834	0.261	0.161	0.359	0.838	0.575	2.685	0.381	99.5557	1.216	98.34	0.37	98.71
LCM-26	13	40.64	0.714	0.222269	52.73	0.269	0.155	0.257	0.812	0.617	2.793	0.369	99.5783	1.259	98.32	0.32	98.64
LCM-26	14	41.202	0.237	0.0877962	53.684	0.281	0.248	0.171	0.514	0.338	2.622	0.327	99.7118	1.177	98.53	0.43	98.96
LCM-26	14	41.288	0.25	0.176704	53.659	0.302	0.265	0.114	0.452	0.281	2.532	0.332	99.6517	1.141	98.51	0.47	98.98
LCM-26	14	40.884	0.287	0.122248	53.258	0.288	0.287	0.19	0.441	0.279	2.523	0.359	98.9182	1.143	97.78	0.46	98.24
LCM-26	15	40.691	0.646	0.155588	53.2	0.287	0.112	0.351	0.796	0.541	2.662	0.346	99.7876	1.199	98.59	0.4	98.99
LCM-26	15	40.747	0.517	0.0666807	53.156	0.258	0.123	0.322	0.69	0.471	2.55	0.366	99.2667	1.156	98.11	0.44	98.55
LCM-26	15	40.675	0.677	0.104466	52.909	0.273	0.136	0.353	0.808	0.696	2.75	0.354	99.7355	1.237	98.5	0.35	98.85
LCM-27	10a	40.441	0.634	0.24783	54.022	0.272	0.204	0.316	0.812	0.607	2.252	0.002	99.8098	0.949	98.86	0.7	99.56
LCM-27	10b	40.167	0.614	0.342294	54.013	0.264	0.167	0.349	0.875	0.613	2.184	0.012	99.6003	0.922	98.68	0.72	99.4
LCM-27	11a	40.704	0.27	0.356742	54.161	0.252	0.232	0.211	0.509	0.269	1.919	0.006	98.8897	0.809	98.08	0.85	98.93
LCM-27	11b	41.026	0.5	0.33896	53.739	0.248	0.184	0.299	0.797	0.559	1.862	0.008	99.561	0.786	98.77	0.88	99.65
LCM-27	2a	41.349	0.255	0.423422	55.203	0.223	0.206	0.154	0.373	0.262	2.385	0.005	100.838	1.005	99.83	0.66	100.49
LCM-27	2b	41.427	0.269	0.436758	55.034	0.236	0.141	0.132	0.328	0.226	2.428	0.005	100.663	1.023	99.64	0.63	100.27
LCM-27	3a	40.546	0.315	0.377857	54.852	0.227	0.19	0.151	0.546	0.272	1.896	0.007	99.3799	0.8	98.58	0.87	99.45
LCM-27	3b	40.922	0.275	0.398973	54.675	0.227	0.195	0.181	0.465	0.322	1.806	0.007	99.474	0.762	98.71	0.92	99.63
LCM-27	4a	41.27	0.363	0.580122	54.929	0.141	0.176	0.123	0.465	0.352	2.588	0.005	100.992	1.091	99.9	0.56	100.46
LCM-27	4b	41.102	0.272	0.539002	55.236	0.114	0.188	0.187	0.442	0.213	2.724	0.002	101.019	1.147	99.87	0.5	100.37
LCM-27	5a	40.603	0.391	0.755714	55.137	0.064	0.066	0.082	0.293	0.2	2.762	0.011	100.365	1.165	99.2	0.46	99.66
LCM-27	5b	40.69	0.353	0.634578	55.126	0.07	0.095	0.12	0.295	0.179	2.573	0.003	100.139	1.084	99.05	0.56	99.61
LCM-27	6a	41.109	0.249	0.258943	54.697	0.232	0.211	0.208	0.489	0.363	1.911	0.003	99.7309	0.805	98.93	0.87	99.8
LCM-27	6b	41.509	0.276	0.373412	54.56	0.211	0.213	0.266	0.517	0.377	2.013	0.004	100.319	0.848	99.47	0.83	100.3
LCM-27	7a	39.334	1.007	0.366744	53.433	0.28	0.215	0.418	1.081	0.787	2.078	0.005	99.0047	0.876	98.13	0.76	98.89
LCM-27	7b	39.868	0.776	0.285616	54.092	0.287	0.211	0.39	0.958	0.713	2.191	0.004	99.7756	0.923	98.85	0.72	99.57
LCM-27	8a	40.61	0.684	0.293395	53.79	0.264	0.215	0.288	0.867	0.581	2.02	0.009	99.6214	0.852	98.77	0.8	99.57
LCM-27	8b	40.13	0.686	0.38008	54.135	0.273	0.209	0.341	0.885	0.786	1.888	0.008	99.7211	0.797	98.92	0.87	99.79
LCM-27	9a	41.374	0.207	0.412309	53.698	0.225	0.165	0.202	0.502	0.359	1.895	0.004	99.0433	0.799	98.24	0.86	99.1
LCM-27	9b	41.339	0.233	0.284504	54.325	0.236	0.168	0.193	0.544	0.347	1.998	0.011	99.6785	0.844	98.83	0.82	99.65
LCM-29	10a	41.702	0.179	0.785721	53.811	0.029	0.123	0.069	0.298	0.114	1.726	0.424	99.2607	0.822	98.44	0.84	99.28
LCM-29	10b	41.813	0.204	0.684588	53.813	0.115	0.116	0.082	0.365	0.067	1.924	0.424	99.6076	0.905	98.7	0.75	99.45
LCM-29	10c	42.329	0.232	0.639023	53.11	0.068	0.11	0.142	0.308	0.129	1.932	0.47	99.469	0.919	98.55	0.72	99.27
LCM-29	1a	41.922	0.181	0.311176	54.464	0.118	0.094	0.039	0.226	0.213	1.82	0.613	100.001	0.904	99.1	0.76	99.86
LCM-29	1b	42.241	0.145	0.386748	54.562	0.151	0.078	0.113	0.321	0.155	1.924	0.643	100.72	0.955	99.76	0.71	100.47
LCM-29	1c	41.638	0.209	0.434536	54.633	0.2	0.098	0.065	0.286	0.13	1.856	0.639	100.189	0.925	99.26	0.74	100
LCM-29	2a	42.006	0.154	0.7935	54.197	0.113	0.103	0.078	0.262	0.089	1.914	0.547	100.256	0.929	99.33	0.73	100.06
LCM-29	2b	42.593	0.237	0.520109	54.734	0.108	0.058	0.212	0.331	0.229	1.864	0.513	101.399	0.9	100.5	0.78	101.28
LCM-29	3a	42.38	0.221	0.539002	54.247	0.332	0.083	0.057	0.369	0.215	2.027	0.683	101.153	1.007	100.15	0.65	100.8
LCM-29	3b	41.702	0.213	0.286727	54.148	0.092	0.062	0.091	0.33	0.178	1.944	0.644	99.6907	0.963	98.73	0.68	99.41
LCM-29	4a	41.41	0.196	0.517887	54.431	0.13	0.12	0.069	0.218	0.079	1.864	0.883	99.9179	0.983	98.93	0.66	99.59
LCM-29	4b	41.39	0.255	0.547893	54.239	0.168	0.136	0.091	0.238	0.181	1.675	0.915	99.8359	0.911	98.92	0.74	99.66
LCM-29	5a	41.471	0.154	0.433424	54.403	0.212	0.077	0.173	0.326	0.092	1.918	0.62	99.8794	0.947	98.93	0.7	99.63
LCM-29	5b	42.367	0.21	0.347851	55.317	0.184	0.078	0.115	0.263	0.178	2.005	0.658	101.723	0.992	100.73	0.68	101.41
LCM-29	6a	41.071	0.228	0.497882	54.248	0.201	0.095	0.074	0.298	0.143	1.737	0.686	99.2789	0.886	98.39	0.77	99.16
LCM-29	6b	41.488	0.242	0.441204	53.979	0.146	0.147	0.121	0.282	0.168	1.988	0.696	99.6982	0.994	98.7	0.65	99.35
LCM-29	7a	41.281	0.182	0.323401	53.506	0.238	0.182	0.195	0.258	0.251	2.181	0.713	99.3104	1.079	98.23	0.54	98.77
LCM-29	7b	41.007	0.173	0.515664	53.816	0.296	0.135	0.152	0.329	0.212	2.093	0.744	99.4727	1.049	98.42	0.57	98.99
LCM-29	8a	40.771	0.222	0.395639	53.964	0.281	0.148	0.204	0.322	0.168	2.03	0.724	99.2296	1.018	98.21	0.61	98.82
LCM-29	8b	40.809	0.181	0.408975	53.57	0.296	0.145	0.243	0.365	0.257	2.119	0.765	99.159	1.064	98.09	0.55	98.64
LCM-29	9a	42.14	0.138	0.345628	54.654	0.146	0.043	0.13	0.361	0.238	1.95	0.681	100.827	0.974	99.85	0.68	100.53
LCM-29	9b	42.007	0.179	0.374523	54.462	0.242	0.099	0.113	0.246	0.178	2.002	0.621	100.524	0.983	99.54	0.67	100.21

## Sheet: Whole Rock
Whole-rock chemical composition and zircon morphology of volcanic ash beds in the Morrison Formation
					XRF trace elements (ppm)																			Instrumental neutron activation analysis (ppm)
Sample Number	Group	Authigenic phases	XRD phases	Field description	Rb	Sr	Y	Zr	Nb	Sc	Ti	V	Cr	Ni	Cu	Zn	Ga	Ba	La	Ce	Nd	Th		As	Ba	Br	Ca	Co	Cr	Cs	Fe	Hf	Rb	Sb	Sc	Sr	Ta	Th	U	W	Zn	La	Ce	Nd	Sm	Eu	Tb	Yb	Lu
MC-106	A	Sme	Sme-Qz-Kfs	mudstone	132	115	43	292	19	8	2995	58	10	0	12	59	20	187	57	108	44	19		2	240	14	0.2	12	7.1	3.8	2.35	8.2	130	0.5	10.1	200	1.1	15	4.2	62	60	49.4	90	35	6.44	1.25	0.8	2.87	0.4
MC-4	F	Kf		silicified	74	560	13	100	8	6	1577	41	1	0	0	32	11	894	41	74	29	6		3	1100	13	2.3	18	7.8	2.6	2.48	3.4	70	0.8	5.51	700	0.25	7.5	1.4	12	40	35.1	62	24	3.92	0.89	0.4	1.68	0.25
MC-6	Z	Cpt-Anl	Qz-cl-Anl-Cal	green silicified zeolitic	41	7303	29	250	9	12	1600	19	2	0	0			848		111	46	1
MC-7	Z	Cpt	Cpt	red zeolitic	76	1380	52	365	20	19	3491	45	6	0	0	72	16	293	31	103	45	15		1	540	12	0.1	5.9	10	2.1	2.27	11	70	0.7	11	1600	1.5	16	6.2	19	110	37.4	76	35	7.73	1.47	1.2	4.04	0.6
MC-8	Z	Anl	Anl	zeolitic	49	695	47	221	12	6	2020	67	1	0	0	74	16	1892	40	75	32	8		3	2200	13	4.4	12	10	1.2	5.58	6.4	50	0.6	7.32	1000	1.3	8.7	3.2	16	70	34.6	66	27	5.06	1	0.8	5.09	0.81
MC-9	Z	Anl	Qz-Anl-Cal	silicified	28	437	31	211	9	4	1371	44	4	0	1	35	9	599	15	66	31	3		6	620	13	3	15	5.2	3.7	2.49	5	40	0.7	4.7	600	0.5	6.9	2.3	66	30	33.5	64	24	4.64	0.97	0.6	3.04	0.49
MC-10	Z	Cpt		green zeolitic	148	1668	51	307	20	19	3501	52	5	0	0	63	13	3088	38	95	42	16
MC-10	Z	Cpt		red zeolitic	114	1454	25	194	13	8	2527	40	6	0	0	42	9	5113	32	97	40	5
MC-13	F	Kf	Kfs	Kf-altered	65	316	18	121	6	8	1871	33	8	0	1	27	8	334	0	46	19	5		11	470	12	5.3	25	9.4	0.5	1.4	3.8	60	0.8	4.01	50	0.6	4.1	0.9	180	20	20.5	35	16	3.19	0.98	0.4	1.22	0.18
MC-15	F	Kf	Kfs	Kf-altered	96	190	22	165	9	10	2092	35	13	0	9	36	11	819	17	55	25	7
MC-17.5	A	Sme	Sme-z	smectitic	155	69	40	278	16	15	3339	74	22	0	13	58	19	160	26	82	36	15
MC-17.75	A	Sme-Kf	Sme-Qz-Kfs	smectitic	107	114	35	396	19	15	3687	51	2	0	6	49	19	202	46	107	44	23
MC-17.9	Z	Zeo	Zeo	lt green	121	157	36	337	19	14	3432	46	12	0	8	38	16	262	31	75	38	16
MC-18	F	Kf-Ab		green dense	152	978	36	126	13	5	2049	50	13	0	0	115	17	4410	85	192	72	8		50	4400	12	0.3	23	11	1.2	6.3	5	130	0.6	5.04	1000	0.9	6.6	6.4	56	110	72	132	50	8.37	1.64	0.9	3.53	0.51
MC-19	Z	Cpt		zeolitic	77	592	32	277	18	14	2998	40	11	0	0	47	17	356	42	110	44	15
MC-23.5	Z	Cpt		zeolitic	34	2534	29	195	16	17	3328	46	10	0	10	41	20	211	63	129	49	5
MC-26	Z	Cpt	Sme-Qz-Cpt	red zeolitic	65	1522	39	260	22	12	2583	32	4	0	0	39	16	123	27	82	38	18
MC-27	F	Ab		white	43	421	23	143	10	11	1973	34	6	0	0	63	12	164	23	44	18	10
MC-27.5	F			white	16	332	29	146	10	2	1257	26	0	0	1	34	15	159	39	103	38	12
MC-28	F	Kf-Ab			45	506	26	140	13	6	2075	42	10	0	4	50	12	733	33	60	24	8
MC-29	F	Kf		white	51	594	17	175	12	6	1917	30	2	0	0	37	13	180	4	49	26	8		1	270	17	0.7	7.7	7.3	0.9	1.59	5.5	50	0.6	6.36	700	0.9	9.6	1.8	26	30	25.8	48	20	3.57	0.93	0.5	1.55	0.23
MC-30	F	Kf		green dense	37	569	13	56	9	9	1128	40	11	0	1	77	9	6010	3	37	24	0
MC-31.5	Z	Cpt	Cpt	salmon zeolitic	120	105	36	320	18	13	1999	25	2	0	0	23	10	202	9	85	36	13
MC-33	Z	Cpt		zeolitic	49	1112	40	304	19	10	2776	32	5	0	0	55	18	167	50	123	53	18
MC-34	F			green dense	50	294	22	197	11	11	2164	36	12	0	4	52	11	233	15	73	30	6
MC-36.5	Z			pink zeolitic	118	453	43	283	16	6	2975	51	13	0	4	49	17	353	16	74	35	12
MC-36.8	x	Clastic		clastic sediment	39	192	24	201	12	12	1755	51	5	0	7	52	11	176	32	63	32	5
MC-39A	A	Sme-Cpt	Sme-Qz-Cpt	purple clay zeolite	81	1140	51	372	18	10	2300	77	1	0	0	59	24	287	104	224	88	23		1	350	11	0.8	6.4	3.5	4.2	3.94	11	70	0.8	4.38	1300	1.9	22	2.7	8	60	85.5	160	65	12.2	1.74	1.5	3.8	0.52
MV-39B	F	Ab	Sme-Qz-Ab	white	96	136	35	369	23	8	1934	43	6	0	13	59	22	194	21	39	24	25		1	310	14	0.1	6	3.5	3.3	3.5	12	90	1.5	4.39	50	1.8	25	0.8	14	50	6.7	16	8	2.2	0.54	0.6	2.54	0.39
MC-40	x	mudstone		mudstone	101	334	36	293	19	7	2616	35	4	0	4	55	19	160	48	86	41	16
MC-43	F	Ab-Cpt	Sme-Qz-Ab-Kfs-Cpt	white	71	689	39	302	22	16	3352	74	5	0	1	55	17	328	34	96	34	13
MC-45	F	Ab		white	66	574	27	300	17	14	3391	41	8	0	1	56	18	341	34	84	34	12
MC45.5	A			red clay	75	367	25	240	15	9	3126	43	8	0	1	54	15	318	40	91	41	13
MC-46	A			white smectitic	89	114	40	369	20	19	4070	44	9	0	5	66	19	190	43	121	49	14		8	270	14	0.6	8.7	14	2.7	1.38	8.9	90	0.7	9.61	50	0.9	14	3.1	28	30	56.6	102	42	7.27	1.84	0.9	3.54	0.52
MC-47	Z			white dense	50	320	27	231	18	13	2616	39	4	0	2	48	16	163	25	67	28	14
MC-47.1	F			purple dense	58	369	48	161	9	8	1512	25	6	0	4	44	13	150	59	97	54	14
MC-47.5	x			mud?	44	218	24	195	13	10	2318	26	8	0	5	40	12	172	37	67	31	8
MC-48	F	Ab	Sme-Qz-Ab-Cpt	white dense	77	247	42	314	19	15	3402	44	11	0	7	55	21	213	35	104	42	13
MC-51	x			shale	34	82	28	134	13	6	1682	22	4	0	9	41	14	156	74	96	37	5		2	150	13	0.3	7.1	9	1.8	2.19	3.9	40	0.5	4.63	50	1	11	1.4	14	30	51.2	90	33	5.52	0.91	0.7	3.1	0.49
MC-52	A	Sme	Sme	smectitic	66	135	37	284	30	6	2463	26	1	0	13	53	24	249	80	121	40	25
MC-52.5	A			white smectitic	73	365	32	305	25	14	3086	28	9	0	0	39	20	365	35	90	38	21
MC-53.5	A			smectitic	33	241	36	354	21	16	3876	37	2	0	5	40	19	262	43	100	39	13
MC-53.8	A			white smectitic	44	297	31	268	21	11	2674	37	5	0	4	47	21	310	51	104	41	18
MC-53.9	A			smectitic	32	298	27	279	18	10	2265	33	3	0	1	44	18	290	42	109	41	18
MC-53.93	A	Sme	Sme	green smectitic	95	85	34	216	15	7	2916	48	24	0	16	42	16	160	31	90	41	11
MC-53.96	A	Sme	Sme	green smectitic	132	112	29	195	13	6	2960	48	32	0	18	54	17	164	28	65	40	10
MC-54	A			green smectitic	112	62	32	133	11	15	2350	47	43	0	6	87	12	181	42	92	37	8
MC-55.3	A	Sme	Sme	green smectitic	91	167	37	253	19	14	3325	61	12	0	13	49	19	512	47	95	51	15
MC-55.5	A	Sme-Qz	Sme-Qz	green smectitic	99	138	37	249	17	17	3061	73	18	0	9	49	19	283	51	109	44	13
MC-57	A	Sme-Ab	Sme-Qz-Ab	smectitic	75	197	55	402	23	17	3409	91	13	0	8	79	21	107	78	168	69	23		18	180	14	1.1	14	11	3	2.36	10	80	1.8	12.6	50	1.5	20	4.5	23	70	67.2	126	56	10.8	2	1.5	4.7	0.64
MC-59	F	Ab		green dense	96	192	26	221	14	2	2605	44	16	0	22	75	15	278	19	74	40	16		1	330	12	0.2	11	16	5.7	3.45	6.3	100	1	6.72	50	1.1	11	1.7	28	90	30.4	60	25	4.98	1	0.8	2.58	0.37
BD-2	F			dense silicified	171	57	33	167	14	14	2537	56	14	0	17	55	19	238	37	72	31	10
BD-5	F	Kf-Anl		dense silicified	54	178	18	146	11	4	1365	23	3	0	9	29	11	214	14	51	29	7
BD-5.5	F			dense silicified	91	294	25	114	12	4	1498	50	6	0	4	48	11	463	24	50	19	2
BD-6	F	Kf-Anl		dense silicified	138	120	23	140	9	10	2040	47	11	0	11	35	16	896	46	76	32	8
BD-7	F	Kf-Anl		dense silicified	46	270	15	156	10	8	1612	51	4	0	4	51	9	4203	42	63	32	7
BD-8	F	Kf-Anl		dense silicified	65	143	18	145	9	9	1726	39	5	0	11	40	11	1405	12	50	23	7
BD-11	F	Ab-Anl		dense silicified	81	109	23	139	10	15	2061	33	4	0	8	45	13	868	28	42	21	7
BD-12	F	Kf-Anl		dense silicified	51	100	25	176	10	12	1822	24	4	0	9	30	8	814	47	84	27	9
BD-13	F			dense silicified	54	141	24	165	10	6	1612	25	2	0	5	16	8	746	33	57	25	8
BD-13.9	F			dense silicified	128	195	34	220	14	10	2614	74	6	0	10	52	16	191	64	121	44	11
BD-14	Z			zeolitic	110	171	25	186	14	9	2384	35	4	0	4	65	12	232	27	67	28	10
BD-15	F			dense silicified	84	134	17	134	11	8	2034	26	0	0	3	72	13	422	34	67	23	9
BD-16	F			dense silicified	71	134	21	99	11	4	1453	23	4	0	3	53	10	541	33	58	20	7
BD-20	A	Sme		smectitic	109	121	55	353	25	12	3137	55	8	0	8	24	23	136	97	151	64	27
NOR-5	A				201.25	190.6	42.5	317.8	30.6	9.55		237.9	12.15	14.55	17.25	72	29.5	63.7	75.05	137.95	73.5	30
NOR-8	A				173.35	320.4	52.1	287.8	34.7	0		31.1	10.1	6.35	12.05	67.2	27.25	162	78.55	146.5	61.6	47.35
NOR-9	A				131.4	278.8	48.6	270.8	27.6	0		31.1	6.8	6.45	11.05	53.25	20	142.1	64.95	122	60.1	33.45
NOR-10	A				234.3	292.4	51.4	320.3	31.7	16.85		86.8	48.6	10.9	20.9	69.25	32.05	126.2	67.1	131.85	53.2	29.1
NOR-11	A				205.9	204.2	53.2	286.2	22.6	13.8		86	52.55	12.5	13.9	50.55	22.35	156.1	60.95	118.95	50	21.95
NH-0-SW	A	Sme		smectitic	186	208	37	317	17	9	3369	321	37	0	6	60	29	46	40	97	33	25
NH-11	A	Sme	Sme-Qz	smectitic	103	136	38	293	18	11	2098	30	4	0	4	57	20	54	55	101	37	18
NH-18	F	Ab	Qz-Ab	dense silicified	57	158	21	113	13	2	1576	34	20	0	14	25	13	432	23	56	21	10
NH-22	F	Ab		dense silicified	13	309	18	116	12	1	1135	33	7	0	6	23	5	8389	10	44	27	4
NH-26	F	Ab		dense silicified	32	116	33	205	10	5	1903	24	6	0	17	87	11	196	33	58	22	7
NH-28	F	Ab		dense silicified	49	145	39	228	15	5	2263	23	4	0	8	53	13	176	41	81	38	5
NH-29	F	Ab		dense silicified	50	129	42	311	16	10	2779	37	2	0	8	60	16	230	54	87	40	11
NH-29.5	F	Ab		dense silicified	71	141	31	279	18	13	3111	159	8	0	9	61	16	214	34	61	28	15
NH-34	F	Ab	Sme-Qz-Ab	dense silicified	58	148	30	187	20	0	1703	27	9	0	24	34	13	333	31	84	33	13
NH-36	F	Ab		dense silicified	73	147	20	193	16	11	2447	39	11	0	20	32	12	338	40	83	25	9
NH-37	F	Ab		dense silicified	72	123	21	191	13	11	2026	35	15	0	18	38	13	241	24	64	27	12
NH-38	F	Ab		dense silicified	74	146	24	229	15	13	2366	39	18	0	15	55	14	303	40	106	41	10
NH-40	F	Ab		dense silicified	88	132	22	220	14	6	2243	40	18	0	14	42	15	318	26	57	30	11
NH-41	F	Ab		dense silicified	63	134	15	165	10	5	2220	45	13	0	23	32	12	1353	40	77	31	9
NH-42	F	Ab		dense silicified	101	190	34	247	15	15	2787	106	17	0	17	53	15	1548	45	66	30	8
NH-44	F	Ab		dense silicified	129	277	199	189	12	8	2477	88	36	29	26	54	15	1782	61	126	63	9
NH-45	F	Ab		dense silicified	44	158	18	137	7	7	1567	28	21	0	11	21	7	693	15	29	21	8
NH-47	F	Ab		dense silicified	112	163	26	213	14	11	2533	39	19	0	12	50	18	343	36	68	27	13
NH-50	F	Ab		dense silicified	56	142	23	176	14	2	2342	46	16	0	9	111	13	296	15	49	24	11
NH-52	F	Ab	Qz-Ab	dense silicified	45	78	22	160	7	8	1398	39	21	0	12	39	7	169	24	17	18	6
NH-53	A	Ilt	Ilt-Qz-Cal	argillic	132	201	43	381	29	7	3785	35	3	0	4	49	23	205	71	138	57	37
NH-54	F	Ab		dense silicified	56	100	49	240	12	10	2476	40	23	0	11	64	13	90	46	91	37	9
NH-55	F	Ab		dense silicified	153	139	27	143	11	12	3131	80	69	1	19	53	15	175	31	44	13	8
NH-56	A	Sme		smectitic	143	272	74	444	29	18	4140	88	12	0	27	38	21	388	65	130	59	31
NH-57	F	Sme		smectitic	109	321	36	163	11	9	2857	45	25	0	15	56	15	1934	39	80	47	8
LCM-1	A	Sme		waxy smectitic, biotite-bearing ash bed	28	131	16	160	22	9	1438	23	3	0	7	53	20	64	61	125	40	15
LCM-1.5	A	Sme		maroon and green ash bed	24	239	23	244	19	16	1622	29	2	0	3	59	21	277	55	110	43	21
LCM-2	A	Sme		smectitic	58	274	32	246	18	13	2590	83	15	0	13	57	21	111	38	80	30	16
LCM-3	A	Sme		w/ mud	67	200	31	211	14	2	1918	47	11	0	8	46	14	59	16	49	21	16
LCM-5	A	Sme		green & purple thin bed w/ bronzed biotite and feldspar	115	194	24	202	16	13	3409	55	17	0	24	74	18	709	28	76	30	12
LCM-6	A	Sme		smectitic	63	168	34	249	13	0	1977	37	7	0	4	43	13	243	12	51	18	10
LCM-7	A	Sme		smectitic	50	193	23	254	21	6	2334	48	10	0	13	65	18	64	5	30	4	20
LCM-8	A	Sme		waxy claystone with small biotite	52	142	56	464	24	34	2894	29	13	0	6	135	23	34	57	141	66	19
LCM-9	A	Sme		smectitic	53	145	62	392	18	17	3416	35	14	0	11		19	81	101	186	83	17
LCM-10	A	Sme		smectitic	75	140	62	302	16	14	3521	58	14	0	14	84	22	293	37	88	46	11
LCM-12	A	Sme		greenish waxy tuff bed, minor biotite	22	314	39	377	22	7	3088	29	0	0	0	69	21	289	82	173	59	20
LCM-13	A	Sme		green tuff, biotite rich	27	146	33	319	20	9	2431	33	2	0	4	83	23	799	88	146	54	17
LCM-14	A	Sme		smectitic	25	175	17	265	14	4	2815	71	4	0	5	120	22	686	39	71	33	25
LCM-15	A	Sme		smectitic	41	199	23	267	18	18	2898	51	12	0	9	68	19	451	65	113	34	13
LCM-16	A	Sme		greenish waxy tuff with biotite	25	375	32	383	28	8	3470	87	3	0	0	85	20	13389	68	155	68	16
LCM-17	A	Sme		greenish-gray tuffaceous mudstone	48	322	27	301	16	8	3152	39	11	0	6	59	18	250	58	143	53	25
LCM-18	A	Sme		reddish brown tuffaceous mudstone, obvious biotite	72	248	22	211	16	14	2439	55	22	0	9	64	18	190	49	99	41	17
LCM-19	A	Sme		purplish-green tuffaceous mudstone	97	207	34	213	16	13	2609	41	25	0	13	57	16	377	30	58	28	11
LCM-20	A	Sme		greenish tuffaceous mudstone, minor biotite	78	240	42	245	14	13	2720	46	20	0	20	65	17	267	42	95	45	16
LCM-21	A	Sme		smectitic	87	207	32	227	19	13	2562	34	18	0	5	85	18	174	83	193	67	24
LCM-22	A	Sme		purplish tuffaceous claystone with biotite	26	226	21	282	19	10	2289	46	1	0	0	80	21	46	62	145	43	20
LCM-23	A	Sme		smectitic	43	195	50	262	16	16	2532	37	25	0	11	61	17	107	40	85	43	15
LCM-24	A	Sme		smectitic	99	170	21	276	15	17	4088	74	28	0	8	83	20	296	28	76	28	11
LCM-25	A	Sme		reddish claystone with biotite	44	225	35	341	27	9	3004	71	8	0	7	73	19	261	60	162	53	26
LCM-26	A	Sme		reddish smectitic claystone with biotite	30	241	50	241	21	0	1936	33	10	0	3	66	23	110	24	79	40	23
LCM-27	A	Sme		reddish tuffaceous claystone with biotite	41	224	35	335	26	4	2538	45	6	0	4	67	22	105	32	97	33	21
LCM-29	A	Sme		smectitic	32	283	30	203	13	4	2078	38	6	0	7	52	19	302	25	72	28	10
LCM-30	A	Sme		smectitic	19	266	31	229	16	18	1974	43	3	0	6	50	17	79	43	125	40	26
LCM-31	A	Sme		green waxy claystone, lots of biotite	35	265	35	277	18	16	2753	42	9	0	13	55	17	430	35	87	40	12
LCM-32	A	Sme		light pinkish gray smectitic mudstone, minor biotite	11	266	46	301	20	4	1625	21	0	0	4	49	20	233	66	135	51	17
LCM-33	A	Sme		smectitic	23	185	36	214	18	12	1873	27	7	0	10	48	18	133	41	86	32	17
LCM-34	A	Sme		smectitic	23	259	50	261	16	14	2746	31	5	0	4	48	17	340	50	127	55	7
LCM-35	A	Sme		purplish smectitic claystone, minor biotite	22	242	38	309	26	10	2225	41	11	0	11	74	20	340	39	95	36	18
LCM-36	A	Sme		smectitic mudstone, minor biotite	43	205	35	280	16	13	3413	53	17	0	9	65	19	125	45	87	31	10
LCM-37	A	Sme		purplish red claystone	13	287	33	387	17	18	3574	65	6	0	2	70	20	33	25	79	30	8
LCM-38	A	Sme		purple claystone	34	213	63	454	29	15	3438	50	21	3	1	88	23	92	63	161	76	21
LCM-39	A	Sme		purple smectitic claystone	37	302	48	318	18	22	3942	53	13	0	1	47	17	159	40	109	51	15
LCM-40	A	Sme		purple smectitic claystone	11	377	65	323	17	10	3084	38	3	0	0	47	17	174	19	114	52	11
LCM-41	A	Sme		green smectitic claystone	23	459	61	349	19	20	4690	51	8	2	0	57	18	113	84	293	96	9
Notom-1319-1	A				36.3	313	20	291	58	4.3	1499	22.6	14.6		14.6	61.6	19.3	208	5.2	48.5	18.2	9.1
Notom-1319-2	A				56.7	234.1	22	251	42	3.5	1499	47	11		44	70.5	20.8	358	22	71.3	30	4.6
Dinosaur-1325-4+4	A				90	36.1	14.5	447	30	4.3	2338	38	13		76.4	67.9	14.8	173	10.5	20.6	7.2	7.7
Front R-1346-18-14	A				95.6	1298.2	9.1	138	95	27	779	45	15		33	29.8	16.3	60	34.2	15.5	5.2
Front R-1346-28-2	A				41.8	368.2	19.9	320	16	6.8	1738	62	21		9.4	61.3	17.6	110	37.3	114.1	27.3
DH-1	A	Sme			11	297	38	108	10	0	770	17	0	0	0	25	10	30	16	46	22	7
CLQ-1A	A	Sme		smectitic	20	167	11	133	7	10	1189	36	3	0	7	76	12	2658	19	29	16	12
CLQ-2	A	Sme		smectitic	31	227	59	217	12	6	2445	53	6	0	10	47	15	590	36	81	43	4
CLQ-2A	A	Sme		smectitic	31	97	28	183	9	10	1983	44	8	0	13	47	13	603	39	61	40	8
CLQ-3	A	Sme		smectitic	55	166	16	170	9	12	2210	40	20	0	11	46	12	1358	19	58	23	5
CLQ-4	A	Sme		smectitic	31	186	19	199	9	8	2240	47	12	0	7	40	14	790	10	62	25	6
CLQ-5	A	Sme		smectitic	22	323	20	193	12	7	2017	49	10	0	1	41	14	1734	5	34	18	4
CLQ-7	A	Sme		smectitic
DINO-1	A	Sme		smectitic	40	201	41	226	15	8	2625	43	14	0	9	54	16	234	40	91	41	11
DINO-2	A	Sme		smectitic	87	233	21	318	18	13	3499	77	28	0	16	56	19	120	49	94	38	8
DINO-3	A	Sme	Sme-Qz	smectitic	34	312	13	162	13	8	1754	27	8	0	4	45	19	137	49	60	25	20
RV-1	A	Sme		smectitic	21	167	25	147	14	6	1204	16	4	0	6	61	14	128	36	87	38	12
FPS-1	A	Sme		smectitic	69	590	44	385	18	14	4171	41	5	0	1	57	20	77	128	207	85	15
RAIN-1	A	Sme		smectitic	4	534	30	292	13	8	3044	89	4	0	2	70	18	67	47	112	47	11
RAIN-1UP	A	Sme		smectitic	4	536	28	294	14	11	2947	83	3	0	3	70	20	56	55	118	47	13
RAIN-2	A	Sme		smectitic	3	1066	34	265	14	14	2828	182	5	0	0	90	17	275	80	225	80	9
Group: A = argillic; F = feldspathic, Z = zeolitic; An = analcime; x = clastic sedimentary rock
Authigenic/XRD phases = Sme = smectitic clay, Ilt = illitic clay; Cpt = clinoptilolite; Anl = analcime; Zeo = zeolite; Kfs = K-feldspar; Ab = albite; Qz = quartz; Cal = calcite
XRD = X-ray diffraction determination of mineral assemblage
LOI = Loss on ignition at 1000°C
